# Supplementary material
Source: PubMed Central journal article supplement (PMC3211109)

■ **General:** Unless otherwise noted, all reactions were performed with distilled and degassed solvents under an atmosphere of dry N<sub>2</sub> in oven- (135 °C) or flame-dried glassware with standard dry box or vacuum line techniques. All substrates were dried by azeotropic distillation with C<sub>6</sub>H<sub>6</sub> prior to use in reactions with Mo- and W-based complexes. Substrate **3**<sup>1</sup>, **11**<sup>2</sup>, and the precursors to **13**<sup>3</sup> were prepared according to the previously reported procedures. Infrared (IR) spectra were recorded on a Bruker FTIR Alpha (ATR Mode) spectrometer,  $\nu_{\text{max}}$  in cm<sup>-1</sup>. Bands are characterized as broad (br), strong (s), medium (m), or weak (w). <sup>1</sup>H NMR spectra were recorded on a Varian Unity INOVA 400 (400 MHz) spectrometer. Chemical shifts are reported in ppm from tetramethylsilane with the solvent resonance resulting from incomplete deuterium incorporation as the internal standard (CDCl<sub>3</sub>:  $\delta$  7.26 ppm, C<sub>6</sub>D<sub>6</sub>:  $\delta$  7.16 ppm, CD<sub>3</sub>OD:  $\delta$  3.31 ppm). Data are reported as follows: chemical shift, integration, multiplicity (s = singlet, d = doublet, q = quartet, br = broad, m = multiplet), and coupling constants (Hz). <sup>13</sup>C NMR spectra were recorded on a Varian Unity INOVA 400 (100 MHz) spectrometer with complete proton decoupling. Chemical shifts are reported in ppm from tetramethylsilane with the solvent resonance as the internal standard (CDCl<sub>3</sub>:  $\delta$  77.16 ppm, CD<sub>3</sub>OD:  $\delta$  49.00 ppm). High-resolution mass spectrometry was performed on a Micromass LCT ESI-MS and JEOL Accu TOF Dart (positive mode) at the Boston College Mass Spectrometry Facility. *Z:E* ratios of **4**, **6** and **12** were determined by analysis of <sup>1</sup>H NMR spectra. The stereochemical identity of the macrocyclic alkenes was established by comparison with reported spectroscopic data (**4**<sup>1</sup>, **12**<sup>2</sup>); the stereochemical identity of **6** was established by X-ray crystal structure of the major isomer. Optical rotations were measured on a Rudolph Research Analytical Autopol IV Polarimeter.

**Vacuum Pumps:** Edwards RV8 two stage rotary vane pump generates a vacuum of 1.0 torr (glove box) or 0.02 torr (fume hood) at point of connection to the reaction vessel. KNF Laboport N840.3FTP diaphragm vacuum pump generates a vacuum of 7.0 torr at point of connection to the reaction vessel.

**Solvents:** Solvents were purged with Ar and purified under a positive pressure of dry Ar by a modified Innovative Technologies purification system. Toluene (Doe & Ingalls), dichloromethane (Fisher), benzene (Aldrich) and pentane<sup>4</sup> (J. T. Baker) were passed successively through activated copper and alumina columns. Tetrahydrofuran was purified by distillation from sodium benzophenone ketyl immediately prior to use. *N,N*-Dimethylformamide (Acros; extra dry with molecular sieves) was used as received. All work-up and purification procedures were carried out with reagent grade solvents (purchased from Fisher) under bench-top conditions.

---

(1) Meng, D.; Bertinato, P.; Balog, A.; Su, D.-S.; Kamenecka, T.; Sorensen, E. J.; Danishefsky, S. J. *J. Am. Chem. Soc.* **1997**, *119*, 10073–10092.

(2) Fürstner, A.; Langemann, K. *J. Org. Chem.* **1996**, *61*, 3942–3943.

(3) Jakubec, P.; Cockfield, D. M.; Dixon, D. J. *J. Am. Chem. Soc.* **2009**, *131*, 16632–16633.

(4) *n*-Pentane was allowed to stir over concentrated H<sub>2</sub>SO<sub>4</sub> for three days, washed with water, followed by a saturated aqueous solution of NaHCO<sub>3</sub>, dried over MgSO<sub>4</sub>, and filtered before use in a solvent purification system.

**Metal-based Complexes:** Mo-based bis(alkoxide) complex **1** was prepared according to a previously reported procedure<sup>5</sup>. Mo or W monopyrrolide-monoaryloxide complexes **7a**, **7b** and **8**<sup>6</sup> were prepared in situ according to published procedures from Mo bis(pyrrolide) complexes **A**, **B** and **C**, respectively, with chiral alcohol **D**<sup>7</sup>; **9** and **10**<sup>8</sup> were prepared and purified according to previously disclosed procedures<sup>9</sup>. Ru-based carbene complexes **2b-d** were obtained from Materia, Inc. and purified by silica gel column chromatography or by recrystallization (dichloromethane / pentane) prior to use. Unless otherwise noted, all Mo and W complexes were handled under an inert atmosphere of N<sub>2</sub> in a dry box. (As noted below, in some cases, catalysts can be manipulated and used outside a glove box).

**Chart 1. Mo Bis-pyrrolide Complexes and the Alcohol Used to Access Catalysts**

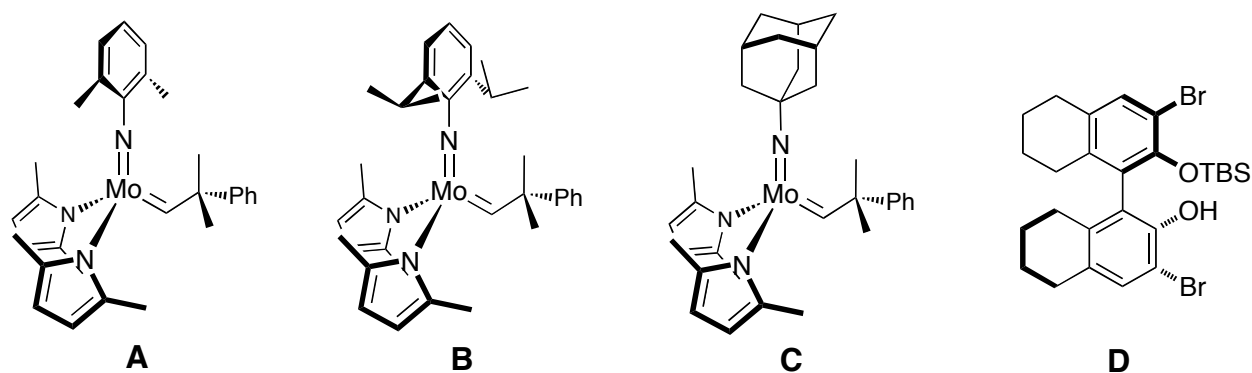

■ **Reagents:**

**Acetic anhydride** was purchased from Aldrich and used as received.

**Azobisisobutyronitrile (AIBN)** was purchased from Janssen Chimica and used as received.

***d*<sub>6</sub>-Benzene** was purchased from Cambridge Isotope Laboratories and distilled from Na into activated 4 Å molecular sieves prior to use.

**6-Bromo-1-hexene** was purchased from Fluorochem and used as received.

***tert*-Butyldimethylsilyl trifluoromethanesulfonate (TBSOTf)** was purchased from TCI and used as received.

**But-3-en-1-amine** was purchased from Alfa Aesar and used as received.

**But-3-en-1-ol** was purchased from Aldrich and used as received.

**(+)-Camphorsulfonic acid** was purchased from Aldrich and used as received.

***d*-Chloroform** was purchased from Cambridge Isotope Laboratories and passed through basic alumina then stored in activated 4 Å molecular sieves prior to use.

(5) Schrock, R. R.; Murdzek, J. S.; Bazan, G. C.; Robbins, J.; DiMare, M.; O'Regan, M. *J. Am. Chem. Soc.* **1990**, *112*, 3875–3886.

(6) Malcolmson, S. J.; Meek, S. J.; Sattely, E. S.; Schrock, R. R.; Hoveyda, A. H. *Nature* **2008**, *456*, 933–937.

(7) (a) Hock, A. S.; Schrock, R. R.; Hoveyda, A. H. *J. Am. Chem. Soc.* **2006**, *128*, 16373–16375. (b) Singh, R.; Czekelius, C.; Schrock, R. R.; Müller, P. M.; Hoveyda, A. H. *Organometallics* **2007**, *26*, 2528–2539.

(8) Jiang, A. J.; Zhao, Y.; Schrock, R. R.; Hoveyda, A. H. *J. Am. Chem. Soc.* **2009**, *131*, 16630–16631.

(9) Jiang, A. J.; Simpson, J. H.; Muller, P.; Schrock, R. R. *J. Am. Chem. Soc.* **2009**, *131*, 7770–7780.

**Dec-9-en-1-ol** was purchased from Aldrich and used as received.

**Dec-9-enoic acid** was purchased from Aldrich and used as received.

**Diisobutylaluminium hydride (DIBAL-H)** was purchased from Strem and used as received.

**Dimethyl sulfoxide (DMSO)** was purchased from Acros and distilled over  $\text{CaH}_2$  and dried over 4 Å activated molecular sieves prior to use.

**Di-tert-Butyl dicarbonate** was purchased from Alfa Aesar and used as received.

**4-(N,N-Dimethylamino)pyridine (DMAP)** was purchased from Aldrich and used as received.

**N,N-Dimethylformamide (DMF)** was purchased from Acros and dried over 4 Å activated molecular sieves prior to use.

**1-Ethyl-3-(3-dimethylaminopropyl)carbodiimide hydrochloride (EDC)** was purchased from Advanced Chem. Tech. and used as received.

**Formaldehyde (37% solution in water)** was purchased from Fisher Scientific and used as received.

**Hex-5-enoic acid** was purchased from Aldrich and used as received.

**Hydrogen fluoride-pyridine complex** was purchased from Aldrich and used as received.

**1-Hydroxy-benzotriazole (HOBT)** was purchased from Advanced Chem. Tech. and used as received.

**2-Iodoxybenzoic acid (IBX)** was purchased from Aldrich and used as received.

**Lithium triethylborohydride (1.0 M solution in THF)** was purchased from Aldrich and used as received.

**2,6-Lutidine** was purchased from Aldrich and distilled over  $\text{CaH}_2$  prior to use.

**Mesitylene** was purchased from Aldrich and distilled over Na prior to use.

**Methanol** was purchased from Aldrich and dried over 4 Å activated molecular sieves prior to use.

***d*<sub>4</sub>-Methanol** was purchased from Cambridge Isotope Laboratories and used as received.

**Methyl triphenylphosphonium bromide** was purchased from Alfa Aesar and used as received.

**Oct-7-enoic acid** was purchased from Aldrich and used as received.

**Oxalyl chloride** was purchased from Acros and distilled over  $\text{CaH}_2$  prior to use.

**Potassium *tert*-butyloxide** was purchased from Alfa Aesar and used as received.

**Tributyltin hydride** was purchased from Alfa Aesar and used as received.

**Triethylamine** was purchased from Aldrich and distilled over  $\text{CaH}_2$  prior to use.

**Trifluoroacetic acid** was purchased from Aldrich and used as received.

***p*-Toluenesulfonic acid (PTSA)** was purchased from Aldrich and used as received.

**Undec-10-enoic acid** was purchased from Aldrich and used as received.

**Undec-10-en-1-amine** was purchased from GFS Chemical and used as received.



## ■ Preparation of Mo Monoalkoxide-monopyrrolide Complexes

Chart 2. *In situ* Generated Mo Monoalkoxide-monopyrrolide Complexes

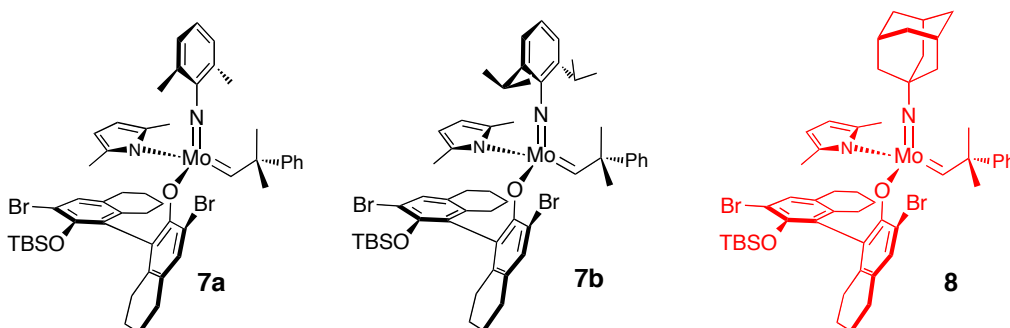

**General procedure for the preparation of Mo complex 8:** In an  $N_2$ -filled glove box, a 4-mL vial with a magnetic stir bar was charged with Mo bispyrrolide complex **C** (8.6 mg, 0.015 mmol), chiral alcohol **D** (8.5 mg, 0.015 mmol), and  $C_6D_6$  (760  $\mu$ L). The vial was tightly capped and the mixture was allowed to stir for one hour, at which time it was transferred to an NMR tube (screw cap NMR) by a pipette. The NMR tube was capped and sealed with Teflon tape. Please note that for *in situ*-generated complexes, only the diagnostic signals of the  $\alpha$  carbon of the *syn*-alkylidenes are shown.  $^1H$  NMR (400 MHz,  $C_6D_6$ ):  $\delta$  12.94 (1H, s), 12.74 (1H, s), 12.46 (1H, s), 12.38 (1H, s); dr = 3:1 (entry 1, Table 1).

**Representative procedure for preparation of Mo complex 8 (used *in situ*):** In an  $N_2$ -filled glove box, a 4 mL vial containing a magnetic stir bar was charged with **C** (6.0 mg, 0.011 mmol), chiral alcohol **D** (6.0 mg, 0.011 mmol), and  $C_6H_6$  (500  $\mu$ L, 0.02 M), resulting in an orange solution. The vial was capped and the mixture was allowed to stir for one hour at 22  $^\circ$ C, after which the catalyst solution was transferred to the reaction mixture by a syringe (dried at 65  $^\circ$ C).

## ■ Synthesis of Macrocyclic Alkenes by Z-Selective Ring-Closing Metathesis (RCM)

**General procedure for catalytic ring-closing metathesis (RCM) reactions with Mo or W-based catalyst:** In an  $N_2$ -filled glove box, an oven-dried 35 mL vial equipped with a magnetic stir bar was charged with the diene substrate. A stock solution of the complex in  $C_6H_6$  (or toluene), prepared as mentioned above, was added to the solution of substrate (0.005 M in toluene) by syringe. The resulting mixture was allowed to stir for two to three minutes to allow complete initiation of the catalyst. The vial was capped with a septum fitted with two 20-gauge needles and connected to a seven torr vacuum generated from a diaphragm vacuum pump. The resulting solution was allowed to stir for the required period of time under vacuum; toluene was added a few times to maintain the appropriate concentration. The reaction was then quenched by exposure of the solution to air and concentrated *in vacuo* (percent conversion determined by 400 MHz  $^1H$  NMR analysis). Purification was performed by silica gel chromatography.

**General procedure for catalytic ring-closing metathesis (RCM) reactions with Ru-based catalyst:** A flame-dried 50 mL round bottom flask equipped with a magnetic stir bar, and fitted with a reflux condenser, was charged with a solution of diene substrate in dichloromethane or toluene. The Ru-based carbene was weighed and dissolved in the corresponding solvent. The solution of the catalyst was then added to the substrate through a syringe. The resulting mixture

was allowed to stir at 40 °C for the required period of time. The reaction was quenched by the addition of excess ethyl vinyl ether and allowed to stir for two hours. Then the mixture was concentrated *in vacuo* (percent conversion determined by 400 MHz  $^1\text{H}$  NMR analysis). Purification was performed by silica gel chromatography.

### Z-selective Macrocyclic Ring-Closing Metathesis (RCM):

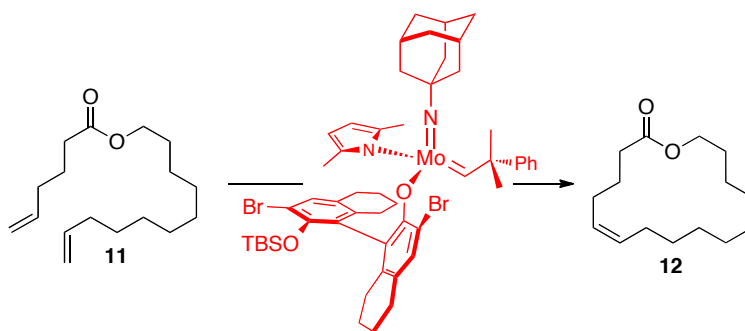

**(Z)-Oxacyclohexadec-6-en-2-one (12).** Following the general procedure for Mo-catalyzed RCM, with 1.2 mol % of **8**, diene **11** (12.4 mg, 0.0446 mmol) was transformed to **12** with 75% conversion in one hour. The resulting yellow oil was purified by silica gel chromatography (50:1 hexanes: diethyl ether) to afford the macrocyclic alkene **12** as a colorless oil (6.2 mg, 0.026 mmol, 56% yield, *Z:E* = 92:8). **IR (neat):** 3003 (m), 2927 (s), 2856 (s), 1735 (s), 1459 (m), 1349 (m), 1239 (m), 1206 (m), 1167 (m), 1144 (m), 1045 (m), 715 (m);  **$^1\text{H}$  NMR (400 MHz,  $\text{CDCl}_3$ ):**  $\delta$  5.40-5.31 (2H, m), 4.15 (2H, dd,  $J = 5.2, 5.2$  Hz), 2.35 (2H, dd,  $J = 6.6, 6.6$  Hz), 2.13-2.01 (4H, m), 1.75-1.61 (4H, m), 1.44-1.27 (12H, m);  **$^{13}\text{C}$  NMR (100 MHz,  $\text{CDCl}_3$ ):**  $\delta$  174.0, 131.2, 129.0, 64.5, 34.3, 28.0, 27.9, 27.4, 27.0, 26.9, 26.8, 26.6, 26.2, 25.6, 25.5; **HRMS (ESI $^+$ )  $[\text{M}+\text{H}]^+$**  calcd for  $\text{C}_{15}\text{H}_{27}\text{O}_2$ : 239.2011, found: 239.2010.

### ■ Model for Origin of Z Selectivity:

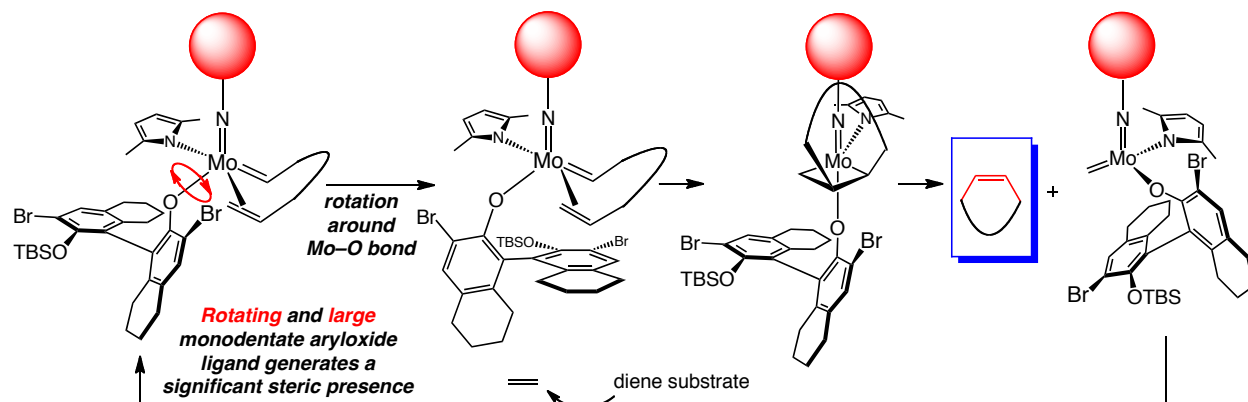

## ■ Synthesis of Epothilone C:

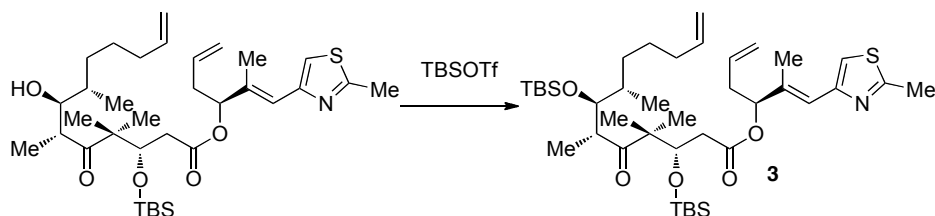

**(3*S*,6*R*,7*S*,8*S*)-(S,*E*)-2-Methyl-1-(2-methylthiazol-4-yl)hexa-1,5-dien-3-yl 3,7-bis((*tert*-butyldimethylsilyl)oxy)-4,4,6,8-tetramethyl-5-oxotridec-12-enoate.** A solution of (3*S*,6*R*,7*S*,8*S*)-(S,*E*)-2-methyl-1-(2-methylthiazol-4-yl)hexa-1,5-dien-3-yl 3-((*tert*-butyldimethylsilyl)oxy)-7-hydroxy-4,4,6,8-tetramethyl-5-oxotridec-12-enoate<sup>10</sup> (0.326 g, 0.522 mmol) in CH<sub>2</sub>Cl<sub>2</sub> (19.9 mL) at -50 °C was treated with 2,6-lutidine (1.82 mL, 15.7 mmol) followed by TBSOTf (3.60 mL, 15.7 mmol). The mixture was allowed to stir at the same temperature for 0.5 hour, after which the reaction was quenched by the addition of a saturated aqueous solution of NH<sub>4</sub>Cl. The resulting mixture was washed with CH<sub>2</sub>Cl<sub>2</sub> (three times). The combined organic layers were dried (MgSO<sub>4</sub>), filtered and concentrated under reduced pressure. Purification by chromatography on SiO<sub>2</sub> (hexanes:ethyl ether = 100:2 to 10:1) followed by the second chromatography (hexanes: diethyl ether = 100:4 to 100:6 to 10:1) to remove TBSOH, afforded the title compound (0.281 g, 0.383 mmol, 73% yield) as a colorless oil. The physical and spectral data were identical to those previously reported<sup>1</sup>. **IR (neat)** 3076 (w), 2954 (m), 2929 (m), 2886 (m), 2856 (m), 1736 (m), 1696 (m), 1641 (w), 1505 (w), 1471 (m), 1385 (s), 1292 (w), 1259 (m), 1177 (m), 1084 (m); **<sup>1</sup>H NMR (400 MHz, CDCl<sub>3</sub>)**: δ 6.95 (1H, s), 6.49 (1H, s), 5.85-5.65 (2H, m), 5.30 (1H, t, *J* = 6.8 Hz), 5.13-4.91 (4H, m), 4.34 (1H, dd, *J* = 6.0, 3.6 Hz), 3.73 (1H, dd, *J* = 6.8, 2.4 Hz), 3.15 (1H, dq, *J* = 14.0, 6.8 Hz), 2.70 (3H, s), 2.56-2.43 (3H, m), 2.39 (1H, dd, *J* = 16.8, 6.0 Hz), 2.07 (3H, d, *J* = 4.0 Hz), 2.05-1.98 (2H, m), 1.50-1.29 (3H, m), 1.24 (3H, s), 1.19-1.06 (2H, m), 1.06-1.02 (6H, m), 0.89 (3H, d, *J* = 6.8 Hz), 0.89 (9H, s), 0.87 (9H, s), 0.15 (3H, s), 0.05 (3H, s), 0.03 (6H, s); **<sup>13</sup>C NMR (100 MHz, CDCl<sub>3</sub>)**: δ 217.9, 171.4, 164.8, 152.7, 139.2, 137.0, 133.6, 121.3, 118.0, 116.6, 114.6, 78.9, 77.8, 74.3, 53.6, 45.4, 40.5, 39.1, 37.7, 34.5, 30.7, 27.3, 26.4, 26.3, 23.4, 20.5, 19.5, 18.7, 18.4, 17.8, 15.6, 14.8, -3.4, -3.6, -4.0, -4.5; **HRMS (ESI<sup>+</sup>) [M+H]<sup>+</sup>** calcd for C<sub>40</sub>H<sub>72</sub>NO<sub>5</sub>SSi<sub>2</sub>: 734.4670, found: 734.4652.

(10) Nicolaou, K. C.; He, Y.; Vourloumis, D.; Vallberg, H.; Roschangar, F.; Sarabia, F.; Ninkovic, S.; Yang, Z.; Trujillo, J. I. *J. Am. Chem. Soc.* **1997**, *119*, 7960–7973

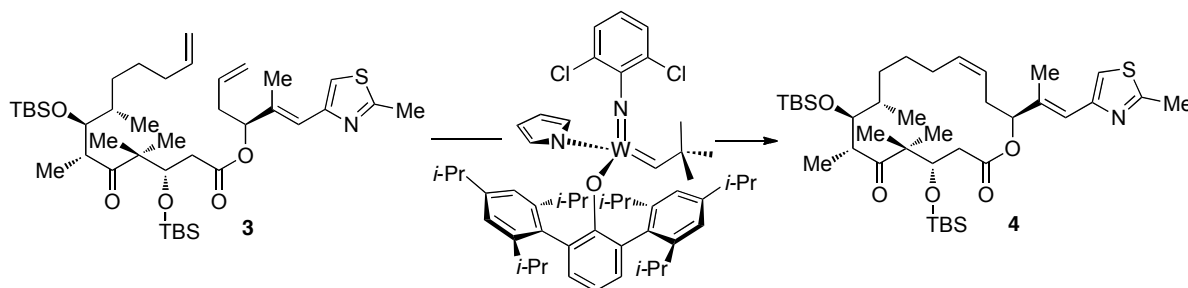

**(4*S*,7*R*,8*S*,9*S*,16*S*,*Z*)-4,8-Bis((*tert*-butyldimethylsilyl)oxy)-5,5,7,9-tetramethyl-16-((*E*)-1-(2-methylthiazol-4-yl)prop-1-en-2-yl)oxacyclohexadec-13-ene-2,6-dione.**

**Reaction outside glovebox:** A 250 mL Airfree<sup>®</sup> Schlenk flask (with a 24/40 joint, lubricated with Krytox<sup>®</sup> fluorinated grease) fitted with an Airfree<sup>®</sup> connecting adapter (Chemglass<sup>®</sup> item number AF-0506-03) and a rubber septum was connected to an argon (UHP) filled manifold, flame-dried and charged with diene **3** (0.219 g, 0.298 mmol). The diene was azeotroped with dry benzene three times (freeze-pump). The reaction apparatus was then charged with the solid tungsten complex (21.9 mg, 0.0224 mmol, weighed in air), evacuated, back-filled with argon and charged with mesitylene (50.0 mL, freshly distilled from sodium and transferred via a gas-tight syringe). The valve on the connecting adapter was closed to isolate the septum from reaction vessel. The resulting solution was exposed to vacuum (0.02 torr) and allowed to stir for 4 hours at 22 °C. The reaction mixture was then quenched by the addition of wet ethyl ether (~1 mL). Purification on SiO<sub>2</sub> (hexanes:Et<sub>2</sub>O 20:1) afforded **4** (0.172 g, 0.243 mmol, 82% yield, 94:6 mixture of *Z/E* isomers as determined by 500MHz <sup>1</sup>H NMR) as a white foam along with recovered starting material (9.3 mg, 0.013 mmol, 3%).

**Reaction inside glovebox:** In an N<sub>2</sub>-filled glovebox, diene (4.1 mg, 0.0056 mmol, azeotroped with benzene) in a 20-mL vial was dissolved in toluene (5.6 mL) and treated with a solution of the tungsten complex (0.028 mL, 0.020 M in benzene, 0.00056 mmol). The vial was capped with a septum fitted with one 20-gauge needles and a vacuum adapter. The mixture was exposed to vacuum (one torr) and allowed to stir at 22 °C for 2.5 hours. Additional toluene was added during the reaction (after 1.5 hours) to compensate for solvent loss due to vacuum. The reaction was quenched by the addition of ethyl ether and concentrated under reduced pressure. Purification on SiO<sub>2</sub> (hexanes: diethyl ether 20:1) afforded the title compound (3.4 mg, 0.0048 mmol, 85% yield, *Z:E* = 96:4) as a colorless solid. The physical and spectral data were identical to those previously reported<sup>11,12</sup>. **IR (neat):** 2955 (m), 2924 (s), 2854 (m), 1743 (m), 1697 (w), 1462 (m), 1378 (w), 1254 (m), 1182 (w), 1158 (w), 1097 (w), 1066 (w), 1019 (w); **<sup>1</sup>H NMR of *Z* isomer (400 MHz, CDCl<sub>3</sub>):** δ 6.96 (1H, s), 6.57 (1H, s) [diagnostic *E* isomer signal: 6.53 (1H, s)], 5.53 (1H, dt, *J* = 11.2, 4.2 Hz), 5.42-5.23 (1H, m), 5.02 (1H, d, *J* = 10.2 Hz), 4.03 (1H, dd, *J* = 10.2, 1.2 Hz), 3.89 (1H, d, *J* = 8.4 Hz), 3.05-2.96 (1H, m), 2.82 (1H, dd, *J* = 16.2, 1.2 Hz), 2.79-2.70 (2H, m), 2.70 (3H, s), 2.67 (1H, dd, *J* = 16.2, 10.2 Hz), 2.40-2.33 (1H, m), 2.11 (3H, d, *J* = 1.2 Hz), 2.10-2.06 (1H, m), 1.90-1.82 (1H, m), 1.62-1.46 (3H, m), 1.30-1.00 (1H, m), 1.19

(11) Storer R. I.; Takemoto, T.; Jackson, P. S.; Brown, D. S.; Baxendale, I. R.; Ley, S. V. *Chem. Eur. J.* **2004**, *10*, 2529–2547.

(12) Schinzer, D.; Bauer, A.; Bohm, O. M.; Limberg, A.; Cordes, M. *Chem. Eur. J.* **1999**, *5*, 2483–2491.

(3H, s), 1.14 (3H, s), 1.09 (3H, d,  $J = 6.6$  Hz), 0.95 (3H, d,  $J = 6.6$  Hz), 0.94 (9H, s), 0.84 (9H, s), 0.12 (3H, s), 0.10 (3H, s), 0.07 (3H, s),  $-0.10$  (3H, s);  $^{13}\text{C}$  NMR (100 MHz,  $\text{CDCl}_3$ ):  $\delta$  215.2, 171.5, 164.8, 152.7, 138.8, 135.3, 123.0, 119.7, 116.3, 79.8, 79.5, 76.6, 53.6, 48.2, 39.1, 38.0, 32.0, 31.6, 29.4, 28.6, 26.6, 26.4, 25.2, 24.4, 19.4, 19.3, 18.9, 18.8, 17.9, 15.5,  $-3.0$ ,  $-3.1$ ,  $-3.5$ ,  $-5.5$ . HRMS (ESI<sup>+</sup>) [ $\text{M}+\text{H}$ ]<sup>+</sup> calcd for  $\text{C}_{38}\text{H}_{67}\text{NO}_5\text{SSi}_2$ : 706.4357, found: 706.4348.

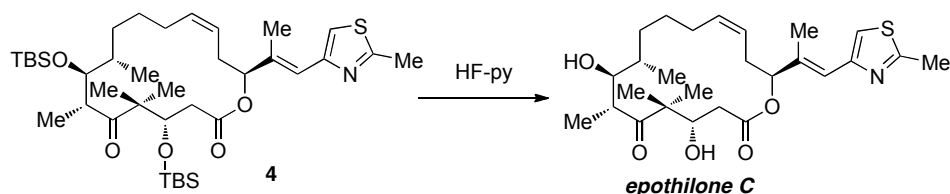

**Epothilone C.** A solution of (4*S*,7*R*,8*S*,9*S*,16*S*,*Z*)-4,8-Bis(*tert*-butyldimethylsilyloxy)-5,5,7,9-tetramethyl-16-((*E*)-1-(2-methylthiazol-4-yl)prop-1-en-2-yl)oxacyclohexadec-13-ene-2,6-dione (26.2 mg, 0.0371 mmol) in THF (3.60 mL) in a plastic vial was treated with HF-pyridine complex (70% HF, 1.09 mL). The mixture was allowed to stir at 22 °C for 36 hours, diluted with  $\text{CH}_2\text{Cl}_2$  and quenched by the addition of a saturated aqueous solution of  $\text{NaHCO}_3$ . The aqueous layer was extracted twice with  $\text{CH}_2\text{Cl}_2$ . The combined organic layers were dried with  $\text{MgSO}_4$  and concentrated under reduced pressure. Purification on  $\text{SiO}_2$  (hexanes: diethyl ether 2:1 to 1:1) afforded epothilone C (15.2 mg, 0.0301 mmol, 81% yield, *Z*:*E* = 95:5) as a colorless solid together with 2.6 mg of mono-desilylated product. The physical and spectral data were identical to those previously reported<sup>12,13</sup>. IR (neat): 3503 (br), 2928 (s), 1732 (s), 1686 (s), 1506 (m), 1465 (m), 1405 (m), 1376 (m), 1331 (m), 1293 (m), 1249 (m), 1184 (m), 1150 (m), 1090 (m), 1047 (m), 1006 (m);  $^1\text{H}$  NMR (400 MHz,  $\text{CDCl}_3$ ):  $\delta$  6.96 (1 H, s), 6.59 (1 H, s) [diagnostic *E* isomer signal: 6.56 (1 H, s)], 5.49-5.34 (2 H, m), 5.29 (1 H, dd,  $J = 10.0$ , 2.0 Hz), 4.22 (1 H, d,  $J = 10.4$  Hz), 3.74 (1 H, dd,  $J = 4.0$ , 2.0 Hz), 3.22 (1 H, br s), 3.14 (1 H, dq,  $J = 13.6$ , 2.4 Hz), 3.02 (1 H, br s), 2.74-2.64 (1 H, m), 2.70 (3 H, s), 2.50 (1 H, dd,  $J = 15.2$ , 11.2 Hz), 2.36 (1 H, dd,  $J = 15.2$ , 2.8 Hz), 2.30-2.15 (2 H, m), 2.09 (3 H, d,  $J = 1.6$  Hz), 2.06-1.98 (1 H, m), 1.80-1.1.61 (2 H, m), 1.41-1.30 (1 H, m), 1.33 (s, 3 H), 1.28-1.16 (2 H, m), 1.18 (3 H, d,  $J = 6.8$  Hz), 1.08 (3 H, s), 1.00 (3 H, d,  $J = 7.2$  Hz);  $^{13}\text{C}$  NMR (100 MHz,  $\text{CDCl}_3$ ):  $\delta$  220.8, 170.6, 165.2, 152.2, 138.9, 133.6, 125.2, 119.6, 116.0, 78.6, 74.3, 72.5, 53.6, 41.9, 39.5, 38.8, 32.6, 32.0, 27.8, 27.7, 23.0, 19.3, 18.7, 16.1, 15.7, 13.7. HRMS (ESI<sup>+</sup>) [ $\text{M}+\text{H}$ ]<sup>+</sup> calcd for  $\text{C}_{26}\text{H}_{40}\text{NO}_5\text{S}$ : 478.2627, found: 478.2625.

(13) Nicolaou, K. C.; He, Y.; Vourloumis, D.; Vallberg, H.; Roschangar, F.; Sarabia, F.; Ninkovic, S.; Yang, Z.; Trujillo, J. I. *J. Am. Chem. Soc.* **1997**, *119*, 7960–7973.

## ■ Synthesis of Nakadomarin A:

### Chart 3. Synthesis of (-)-Nakadomarin A

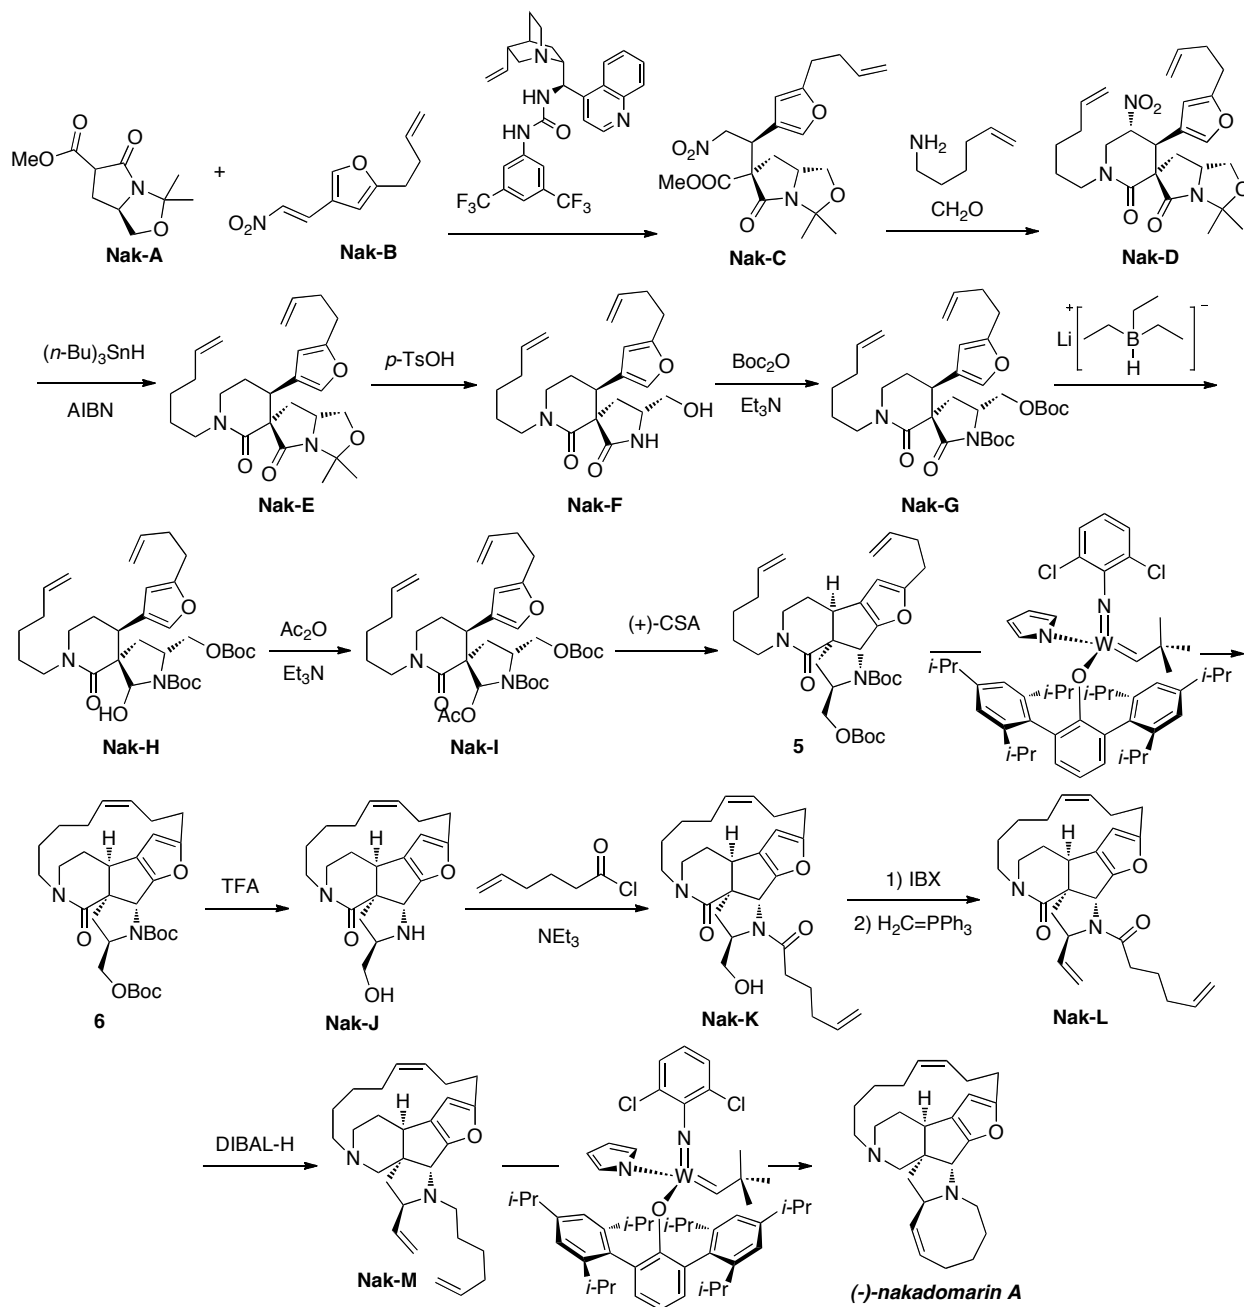

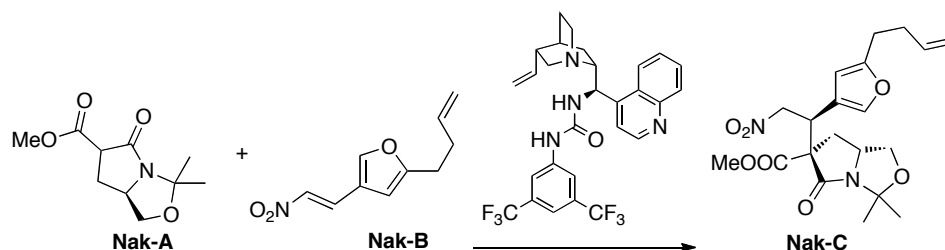

**Nitro ester Nak-A.** To a solution of methyl ester **Nak-A**<sup>14</sup> (8.28 g, 38.8 mmol) and nitroalkene **Nak-B**<sup>4</sup> (4.95 g, 25.6 mmol) in toluene (82 mL) was added organocatalyst<sup>4</sup> (4.26 g, 7.77 mmol) in one portion. The mixture was allowed to stir for three days at 30 °C before being concentrated *in vacuo* and purified by silica gel chromatography (7:3 to 3:7 petroleum ether: diethyl ether). **Nak-C** was obtained as a yellow crystalline solid, which was further purified by recrystallization from diethyl ether and cooled to -20 °C. Further purification of the mother liquors were also required in a similar manner to give the desired compound as a colorless crystalline solid (7.50 g, 18.4 mmol, 72% yield, single diastereoisomer). M.p. 90-92 °C; **IR (neat)**: 2984 (w), 2935 (w), 1738 (s), 1690 (s), 1554 (s), 1413 (m), 1380 (m), 1278 (m), 1224 (m), 1038 (w), 923 (w), 819 (w); **<sup>1</sup>H NMR (400 MHz, CDCl<sub>3</sub>)**: δ 7.30 (1H, d, *J* = 0.8 Hz), 6.03 (1H, d, *J* = 0.8 Hz), 5.78 (1H, ddt, *J* = 17.0, 10.3, 6.6 Hz), 5.06-4.86 (4H, m), 4.07 (1H, dd, *J* = 10.6, 3.8 Hz), 3.94-3.88 (1H, m), 3.82 (3H, s), 3.43-3.30 (2H, m), 2.67 (2H, t, *J* = 7.5 Hz), 2.40-2.31 (2H, m), 2.21-2.17 (2H, m), 1.68 (3H, s), 1.43 (3H, s); **<sup>13</sup>C NMR (100 MHz, CDCl<sub>3</sub>)**: δ 171.7, 167.3, 157.1, 140.3, 137.0, 119.6, 115.6, 105.0, 91.9, 76.8, 69.9, 63.5, 58.7, 53.4, 38.8, 33.4, 31.9, 27.5, 26.3, 23.3; **HRMS (ESI<sup>+</sup>) [M+Na]<sup>+</sup>** calcd for C<sub>20</sub>H<sub>26</sub>N<sub>2</sub>NaO<sub>7</sub>: 429.1632, found: 429.1637; [ $\alpha$ ]<sub>D</sub><sup>21</sup> + 0.9 (c = 0.67, CHCl<sub>3</sub>).

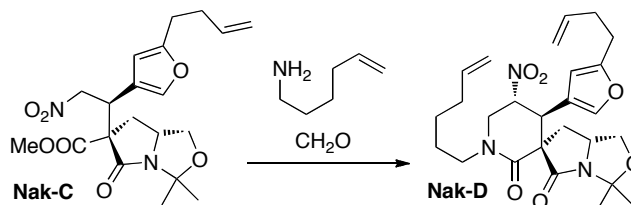

**Nitro lactam Nak-D.** A mixture of 6-bromo-1-hexene (11.4 g, 69.9 mmol) and NaN<sub>3</sub> (6.82 g, 105 mmol) in DMSO (82 mL) was allowed to stir at 22 °C for two hours. The mixture was poured into water (160 mL) and washed three times with diethyl ether (50 mL). The combined organic layers were washed with brine and water was added. Triphenylphosphine (36.7 g, 140 mmol) was added over ten minutes. The resulting solution was stirred for 16 hours and then washed with a solution of aqueous 1.0 M HCl three times. The aqueous phase was washed with diethyl ether and the aqueous layer was basified with solid sodium hydroxide while cooling in an ice-bath and then washed three times with diethyl ether (50 mL). The combined organic layers were washed with brine, dried and concentrated with a stream of nitrogen, to afford the desired amine as a colorless oil. A solution of nitro ester **Nak-C** (5.30 g, 13.0 mmol), hex-5-en-1-amine

(14) Kyle, A. F.; Jakubec, P.; Cockfield, D. M.; Cleator, E.; Skidmore, J.; Dixon, D. J. *Chem. Commun.* **2011**, DOI: 10.1039/c1cc13665h.

(1.94 g, 19.6 mmol) and formaldehyde (37% solution in water) (1.59 g, 1.46 mL, 19.6 mmol) in MeOH (100 mL) was allowed to heat at 65 °C for five hours. The solution was allowed to cool to 22 °C and concentrated *in vacuo* before being purified by silica gel chromatography (1:1 to 2:8 petroleum ether: diethyl ether) to afford the nitroamide **Nak-D** as a brown oil (4.15 g, 8.58 mmol, 66% yield). **IR (neat)**: 2982 (w), 2933 (w), 2858 (w), 1693 (s), 1650 (s), 1556 (s), 1411 (m), 1350 (m), 1259 (m), 1134 (w), 916 (w), 821 (w); **<sup>1</sup>H NMR (400 MHz, CDCl<sub>3</sub>)**: δ 7.28 (1H, d, *J* = 1.0 Hz), 6.06 (1H, d, *J* = 1.0 Hz), 5.89 (1H, ddd, *J* = 12.0, 9.5, 6.5 Hz), 5.84-5.72 (2H, m), 5.06-4.93 (4H, m), 4.01 (1H, dd, *J* = 12.0, 6.4 Hz), 3.90 (1H, dd, *J* = 8.0, 5.4 Hz), 3.79 (1H, dd, *J* = 12.1, 9.1 Hz), 3.57-3.47 (3H, m), 3.46-3.34 (2H, m), 3.01 (1H, dd, *J* = 13.3, 7.2 Hz), 2.66 (2H, t, *J* = 7.5 Hz), 2.38-2.30 (2H, m), 2.13-2.05 (2H, m), 1.90 (1H, dd, *J* = 13.1, 7.3 Hz), 1.70-1.56 (2H, m), 1.58 (3H, s), 1.47-1.37 (2H, m), 1.35 (3H, s); **<sup>13</sup>C NMR (100 MHz, CDCl<sub>3</sub>)**: δ 168.4, 167.2, 157.2, 139.9, 138.3, 137.0, 118.8, 115.7, 114.9, 104.9, 91.6, 81.5, 69.7, 62.8, 58.7, 49.4, 48.3, 42.9, 33.3, 31.9, 31.6, 27.6, 26.3, 26.2, 25.8, 23.3; **HRMS (ESI<sup>+</sup>) [M+Na]<sup>+</sup>** calcd for C<sub>26</sub>H<sub>35</sub>N<sub>3</sub>NaO<sub>6</sub>: 508.2418, found: 508.2412; [α]<sub>D</sub><sup>21</sup> +97.3 (*c* = 0.640, CHCl<sub>3</sub>).

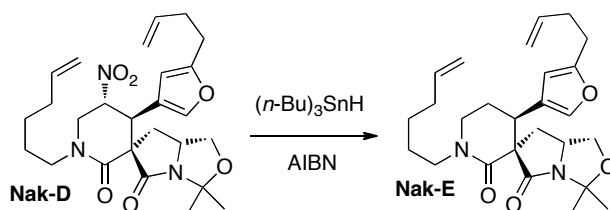

**Spirolactam Nak-E.** Nitroamide **Nak-D** (5.60 g, 11.5 mmol) was dissolved in mesitylene (160 mL). To this solution was added AIBN (0.380 g, 2.31 mmol) and tributyltin hydride (16.8 g, 15.3 mL, 57.7 mmol); the mixture was degassed by repeated cycles of vacuum/nitrogen purge. The solution was heated rapidly to 160 °C in a pre-heated oil bath for 2.5 hours before being cooled to 22 °C. The mixture was loaded directly onto silica gel; the mesitylene and excess tin compounds eluted with petroleum ether before ramping the solvent system (9:1 to 1:8 petroleum ether: diethyl ether), to afford the spirolactam **Nak-E** as pale yellow oil (2.95 g, 6.67 mmol, 58% yield). **IR (neat)**: 2982 (w), 2932 (w), 2863 (w), 1691 (s), 1638 (s), 1548 (w), 1491 (w), 1442 (w), 1406 (m), 1261 (w), 914 (w); **<sup>1</sup>H NMR (400 MHz, CDCl<sub>3</sub>)**: δ 7.24 (1H, br. s), 6.05 (1H, br. s), 5.87-5.74 (2H, m), 5.08-4.91 (4H, m), 3.88 (1H, dd, *J* = 7.7, 5.2 Hz), 3.54-3.31 (6H, m), 2.99 (1H, dd, *J* = 12.8, 7.5 Hz), 2.95-2.87 (2H, m), 2.70-2.63 (2H, m), 2.40-2.32 (2H, m), 2.14-2.03 (2H, m), 1.84 (1H, dd, *J* = 12.6, 7.1 Hz), 1.78-1.71 (1H, m), 1.67-1.53 (5H, m), 1.48-1.36 (2H, m), 1.29 (3H, s); **<sup>13</sup>C NMR (100 MHz, CDCl<sub>3</sub>)**: δ 169.5, 168.6, 156.2, 138.6, 137.8, 137.2, 124.7, 115.4, 114.6, 105.6, 91.2, 69.9, 63.3, 58.6, 48.3, 47.4, 40.0, 33.4, 33.0, 32.0, 27.6, 26.3, 26.3, 26.0, 25.3, 23.4; **HRMS (ESI<sup>+</sup>) [M+Na]<sup>+</sup>** calcd for C<sub>26</sub>H<sub>36</sub>N<sub>2</sub>NaO<sub>4</sub>: 463.2567, found: 463.2578; [α]<sub>D</sub><sup>21</sup> +94.1 (*c* = 2.30, CHCl<sub>3</sub>).



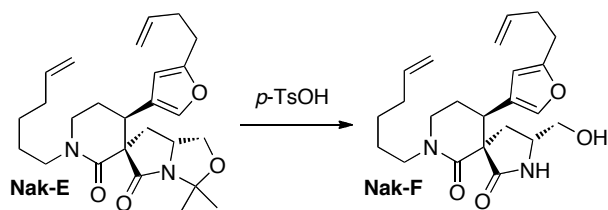

**Alcohol Nak-F.** *p*-Toluenesulfonic acid (63.0 mg, 0.330 mmol) was added to a solution of spiroactam **Nak-E** (2.91 g, 6.61 mmol) in methanol (150 mL) and the mixture was heated to 65 °C and allowed to stir at that temperature for four hours. Additional amount of *p*-toluenesulfonic acid (10.0 mg, 0.0500 mmol) was then introduced. After heating at reflux for an additional hour, the solution was cooled to 22 °C, concentrated and purified by silica gel chromatography (ethyl acetate to 98:2 ethyl acetate: methanol) to afford **Nak-F** as a colorless oil (2.11 g, 5.29 mmol, 80% yield). **IR (neat):** 3406 (m), 3270 (m), 2929 (m), 2858 (m), 1695 (s), 1618 (s), 1494 (w), 1435 (m), 1348 (w), 1272 (m), 1125 (w), 1062 (w), 912 (m), 734 (w); **<sup>1</sup>H NMR (400 MHz, CDCl<sub>3</sub>):** δ 7.22 (1H, d, *J* = 0.8 Hz), 6.28 (1H, br. s), 6.06 (1H, d, *J* = 0.8 Hz), 5.87-5.73 (2H, m), 5.08-4.91 (4H, m), 4.47 (1H, t, *J* = 5.4 Hz), 3.59 (2H, t, *J* = 4.9 Hz), 3.52-3.37 (3H, m), 3.37-3.22 (2H, m), 3.15-3.02 (1H, m), 2.84 (1H, dd, *J* = 13.4, 2.8 Hz), 2.71-2.60 (3H, m), 2.41-2.32 (2H, m), 2.16-2.03 (3H, m), 1.84-1.72 (1H, m), 1.67-1.54 (2H, m), 1.45-1.35 (2H, m); **<sup>13</sup>C NMR (100 MHz, CDCl<sub>3</sub>):** δ 175.6, 170.5, 156.2, 138.5, 138.1, 137.4, 124.4, 115.3, 114.7, 105.7, 65.7, 55.6, 52.9, 48.5, 47.6, 40.4, 34.0, 33.4, 32.0, 27.6, 26.3, 26.0, 25.3; **HRMS (ESI<sup>+</sup>) [M+Na]<sup>+</sup>** calcd for C<sub>23</sub>H<sub>32</sub>N<sub>2</sub>NaO<sub>4</sub>: 423.2254, found: 423.2258; [α]<sub>D</sub><sup>21</sup> +112.0 (*c* = 0.700, CHCl<sub>3</sub>).

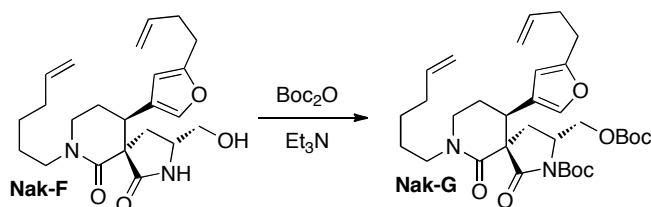

**Bis-Boc-protected lactam Nak-G.** To a solution of **Nak-F** (1.75 g, 4.37 mmol) in CH<sub>2</sub>Cl<sub>2</sub> (75 mL) was added DMAP (53.0 mg, 0.430 mmol) and triethylamine (2.21 g, 3.04 mL, 21.9 mmol) before the portionwise addition of di-*tert*-butyl dicarbonate (4.77 g, 21.9 mmol). The solution was allowed to stir at 22 °C for 15 hours. The resulting dark yellow solution was concentrated and purified by silica gel chromatography (4:1 to 3:7 petroleum ether: ethyl acetate), to give the bis-Boc-protected lactam **Nak-G** as a colorless oil (2.55 g, 4.24 mmol, 97% yield). **IR (neat):** 2979 (w), 2934 (w), 1781 (m), 1744 (s), 1640 (s), 1491 (w), 1455 (w), 1369 (m), 1278 (s), 1254 (s), 1158 (s), 914 (w), 856 (w); **<sup>1</sup>H NMR (400 MHz, CDCl<sub>3</sub>):** δ 7.17 (1H, br, s), 5.93 (1H, br, s), 5.85-5.73 (2H, m), 5.06-4.92 (4H, m), 4.44 (1H, dd, *J* = 10.0, 4.4 Hz), 4.19 (1H, dd, *J* = 9.9, 8.6 Hz), 3.82 (1H, tt, *J* = 8.9, 4.5 Hz), 3.52-3.40 (3H, m), 3.29 (1H, ddd, *J* = 13.1, 8.7, 6.4 Hz), 3.06-2.92 (1H, m), 2.84 (1H, dd, *J* = 13.4, 2.8 Hz), 2.73 (1H, dd, *J* = 13.8, 4.7 Hz), 2.65-2.58 (2H, m), 2.37-2.29 (2H, m), 2.13-2.03 (3H, m), 1.79-1.71 (1H, m), 1.66-1.52 (2H, m), 1.48 (9H, s), 1.46 (9H, s), 1.45-1.36 (2H, m); **<sup>13</sup>C NMR (100 MHz, CDCl<sub>3</sub>):** δ 172.8, 167.7, 156.7, 153.1, 149.4, 138.5, 138.3, 137.2, 123.9, 115.4, 114.7, 105.1, 83.3, 82.1, 68.2, 57.0, 53.4, 48.3,

47.4, 41.6, 33.5, 32.0, 31.3, 27.9, 27.8, 27.6, 26.4, 26.1, 25.2; **HRMS (ESI<sup>+</sup>) [M+Na]<sup>+</sup>** calcd for C<sub>33</sub>H<sub>48</sub>N<sub>2</sub>NaO<sub>8</sub>: 623.3303, found: 623.3312; [α]<sub>D</sub><sup>21</sup> +120.0 (*c* = 0.700, CHCl<sub>3</sub>).

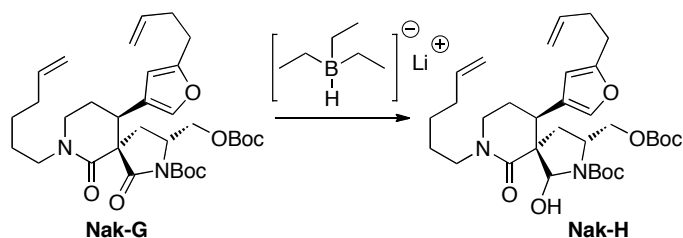

**Boc-protected hemiaminol Nak-H.** To a solution of **Nak-G** (2.50 g, 4.16 mmol) in THF (105 mL) was added dropwise lithium triethylborohydride (11.2 mL, 11.2 mmol, 1.0 M solution in THF) at  $-78\text{ }^{\circ}\text{C}$  and the solution was allowed to stir at this temperature for three hours. The reaction was then quenched by the addition of a saturated aqueous solution of NH<sub>4</sub>Cl (100 mL). The reaction was allowed to warm to  $22\text{ }^{\circ}\text{C}$  over one hour and then diluted by the addition of diethyl ether (150 mL). The aqueous layer was washed and the combined organics were dried (Na<sub>2</sub>SO<sub>4</sub>) and concentrated. The resulting oil was purified by silica gel chromatography (4:1 to 7:3 petroleum ether: ethyl acetate) to afford **Nak-H** as a colorless oil (2.04 g, 3.37 mmol, 81% yield): The <sup>1</sup>H NMR spectrum of the title compound suffers from considerable broadening due to rotamers when run in CDCl<sub>3</sub> at 298 K. Attempts to improve this spectrum by collecting the data in toluene-d<sub>8</sub> at 363 K resulted in decomposition of the compound. The material was used in the next step without full characterization.

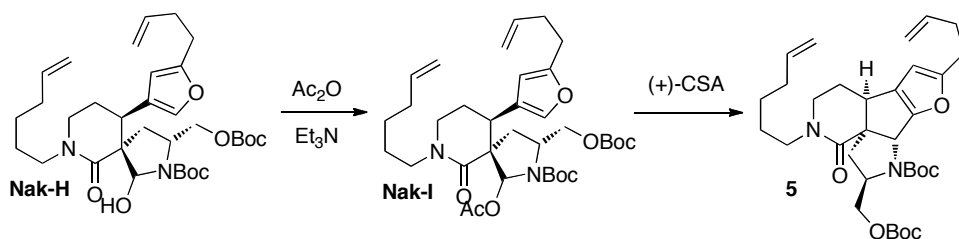

**Diene 5.** To a solution of **Nak-H** (300 mg, 0.498 mmol) in CH<sub>2</sub>Cl<sub>2</sub> (10 ml) was added triethylamine (280 mg, 0.390 mL, 2.79 mmol), acetic anhydride (290 mg, 0.260 mL, 2.79 mmol) and DMAP (3.0 mg, 0.025 mmol). The reaction was allowed to stir at  $22\text{ }^{\circ}\text{C}$  for six hours, followed by the addition of a second portion of DMAP (20.0 mg, 0.164 mmol). The mixture was allowed to stir for 15 hours, before being filtered through a short pad of silica, which was washed with diethyl ether. The filtrate was concentrated and the resulting residue was dissolved in CH<sub>2</sub>Cl<sub>2</sub> (10 ml), (+)-camphorsulfonic acid (21.0 mg, 0.0900 mmol) was added and the mixture was allowed to stir at  $22\text{ }^{\circ}\text{C}$  for one hour. The resulting solution was concentrated *in vacuo* and the resulting oil was purified by column chromatography (9:1 to 6:4 petroleum ether: ethyl acetate), to give diene **5** as colorless oil (268 mg, 0.458 mmol, 92% yield). The <sup>1</sup>H NMR spectrum of the title compound suffers from broadening due to the presence of rotamers when performed in CDCl<sub>3</sub> at  $22\text{ }^{\circ}\text{C}$ . The major rotamer has been assigned. **IR (neat)**: 2978 (m), 2931 (m), 1743 (s), 1699 (s), 1640 (s), 1483 (w), 1454 (w), 1380 (s), 1369 (s), 1279 (s), 1255 (s), 1162 (s), 1099 (w), 913 (w), 863 (w); **<sup>1</sup>H NMR (400 MHz, CDCl<sub>3</sub>)**: δ 5.91-5.68 (3H, m), 5.08-4.90

(5H, m), 4.72 (1H, dd,  $J = 9.6, 3.5$  Hz), 4.35 (1H, t,  $J = 9.5$  Hz), 4.13-4.04 (1H, m), 3.37 (2H, t,  $J = 7.3$  Hz), 3.27-3.12 (2H, m), 3.02 (1H, t,  $J = 6.1$  Hz), 2.69 (2H, t,  $J = 7.6$  Hz), 2.59 (1H, dd,  $J = 13.4, 4.5$  Hz), 2.38 (2H, q,  $J = 7.1$  Hz), 2.16-1.99 (4H, m), 1.71-1.60 (1H, m), 1.56-1.43 (20H, m), 1.40-1.30 (2H, m);  $^{13}\text{C}$  NMR (100 MHz,  $\text{CDCl}_3$ ):  $\delta$  172.2, 161.1, 155.0, 153.9, 153.2, 138.4, 137.3, 128.2, 115.4, 114.8, 102.2, 81.7, 80.0, 67.0, 65.9, 63.9, 56.8, 48.0, 45.1, 43.5, 40.5, 33.4, 32.0, 29.2, 28.5, 28.3, 27.8, 26.7, 26.0; HRMS (ESI<sup>+</sup>) [ $\text{M}+\text{Na}$ ]<sup>+</sup> calcd for  $\text{C}_{33}\text{H}_{48}\text{N}_2\text{NaO}_7$ : 607.3354, found: 607.3349;  $[\alpha]_D^{21} +28.9$  ( $c = 3.40, \text{CHCl}_3$ ).

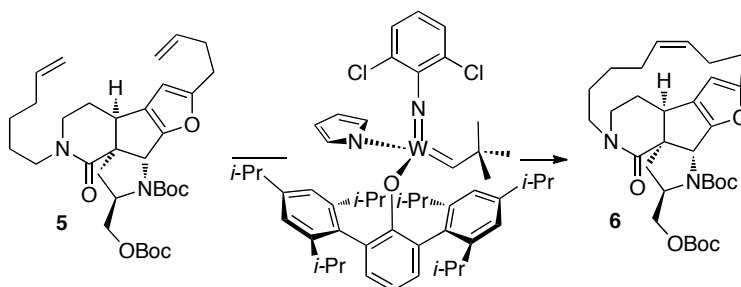

**Boc-protected pentacycle 6.** In an  $\text{N}_2$ -filled glove box, a 100 mL round bottom flask was charged with diene (107 mg, 0.186 mmol). Toluene (37 mL) was added and W complex **10** (9.1 mg, 0.0093 mmol, 0.05 equivalent) was subsequently introduced. The resulting mixture was allowed to stir for three minutes to allow complete initiation of the catalyst. The flask was capped with a septum fitted with two 20-gauge needles and connected to a seven torr vacuum generated from a diaphragm vacuum pump. After it was allowed to stir at 22 °C for two hours, the mixture was removed from the glovebox and exposed to air. The resulting solution was concentrated to deliver a yellow oil, which was then purified by silica gel chromatography (2:1 to 1:2 hexanes: diethyl ether) to afford the macrocyclic alkene **6** as a white solid (94.1 mg, 0.168 mmol, 90% yield,  $Z:E = 97:3$ ). M.p. 184-187 °C; IR (neat): 2978 (s), 2938 (s), 2868 (m), 1742 (s), 1694 (s), 1634 (s), 1488 (m), 1453 (m), 1393 (s), 1367 (s), 1351 (s), 1277 (s), 1254 (s), 1155 (s), 1106 (s), 953 (m), 859 (m), 792 (m), 761 (m), 732 (m);  $^1\text{H}$  NMR (400 MHz,  $\text{CDCl}_3$ ):  $\delta$  5.82 (1H, s), 5.44 (1H, dt,  $J = 5.6, 6.1$  Hz), 5.26 (1H, dt,  $J = 5.6, 6.0$  Hz), 4.81-4.72 (2H, m), 4.46 (1H, dt,  $J = 8.8, 2.4$  Hz), 4.28-4.25 (1H, m), 4.17 (1H, dd,  $J = 6.6, 5.4$  Hz), 3.27 (1H, s), 3.14 (1H, dt,  $J = 7.6, 2.4$  Hz), 2.90 (1H, dd,  $J = 8.0, 2.8$  Hz), 2.75 (1H, t,  $J = 8.4$  Hz), 2.59-2.41 (4H, m), 2.19 (2H, dd,  $J = 8.8, 4.0$  Hz), 2.10 (1H, d,  $J = 8.4$  Hz), 1.93-1.88 (2H, m), 1.62-1.59 (1H, m), 1.53-1.40 (19H, m), 1.28-1.23 (1H, m), 0.99-0.96 (1H, m), 0.03-0.05 (1H, m);  $^{13}\text{C}$  NMR (100 MHz,  $\text{CDCl}_3$ ):  $\delta$  171.6, 159.9, 157.0, 154.2, 153.4, 130.5, 128.7, 128.5, 103.0, 82.1, 80.2, 69.0, 67.7, 67.6, 58.3, 46.8, 43.5, 39.5, 36.0, 28.8, 28.3, 27.9, 27.6, 26.6, 26.3, 25.6, 22.3; HRMS (ESI<sup>+</sup>) [ $\text{M}+\text{H}$ ]<sup>+</sup> calcd for  $\text{C}_{31}\text{H}_{45}\text{N}_2\text{O}_7$ : 557.3227, found: 557.3218;  $[\alpha]_D^{20} -63.17$  ( $c = 0.640, \text{CHCl}_3$ ).

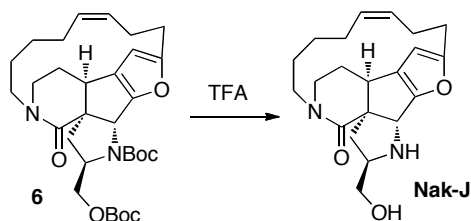

**Aminol Nak-J.** In a 35-mL vial equipped with a magnetic stir bar, the macrocyclic alkene **6** (130 mg, 0.233 mmol) was treated with trifluoroacetic acid (1.0 mL, 13 mmol), and allowed to stir for five minutes at 22 °C. The trifluoroacetic acid was removed by vacuum. The resulting yellow oil was treated with a saturated aqueous solution of NaHCO<sub>3</sub> (6.0 mL) and dichloromethane (6.0 mL). Layers were partitioned and the aqueous layer was washed with a 4:1 solution of chloroform/isopropanol (6.0 mL x 3). The combined organic layers were dried and concentrated. The resulting yellow oil was purified by silica gel chromatography (9:1 dichloromethane: methanol) to afford the aminol **Nak-J** as a white solid (80.0 mg, 0.225 mmol, 95% yield, *Z:E* = 95:5). M.p. 182–185 °C; **IR** (neat): 3368 (br, s), 3004 (m), 2925 (s), 2856 (s), 1676 (s), 1604 (s), 1494 (m), 1443 (s), 1361 (m), 1201 (s), 1181 (s), 1131 (s), 1035 (m), 840 (m), 800 (m), 722 (m); **<sup>1</sup>H NMR** (400 MHz, CDCl<sub>3</sub>): δ 5.82 (1H, s), 5.46 (1H, dt, *J* = 8.8, 7.4 Hz), 5.26 (1H, dt, *J* = 8.8, 8.0 Hz), 4.80–4.37 (4H, m), 3.82–3.69 (3H, m), 3.29 (1H, s), 3.08 (1H, dt, *J* = 12.4, 3.6 Hz), 2.91 (1H, dd, *J* = 12.0, 4.0 Hz), 2.82–2.78 (1H, m), 2.62–2.46 (3H, m), 2.32 (1H, dd, *J* = 12.4, 9.6 Hz), 2.16–2.09 (2H, m), 2.00–1.88 (3H, m), 1.64–1.46 (2H, m), 1.30–1.25 (1H, m), 1.05–0.99 (1H, m), 0.06–0.05 (1H, m); **<sup>13</sup>C NMR** (100 MHz, CDCl<sub>3</sub>): δ 173.6, 161.7, 155.8, 130.4, 129.6, 128.7, 103.4, 71.7, 69.0, 63.7, 63.0, 46.8, 43.4, 41.1, 37.1, 28.8, 27.6, 26.4, 26.0, 25.3, 23.2; **HRMS** (ESI<sup>+</sup>) [**M+H**]<sup>+</sup> calcd for C<sub>21</sub>H<sub>29</sub>N<sub>2</sub>O<sub>3</sub>: 357.2178, found: 357.2171; [α]<sub>D</sub><sup>20</sup> –78.41 (c = 0.700, CHCl<sub>3</sub>).

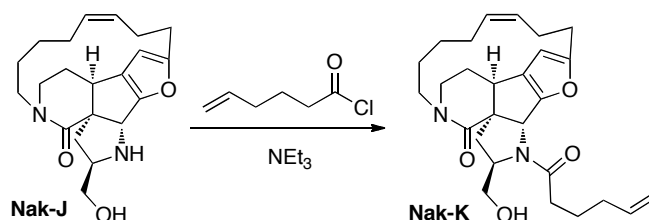

**Alcohol Nak-K.** In a 4-mL vial equipped with a magnetic stir bar, DMF (20 μL) was added to 5-hexenoic acid (40.0 mg, 0.351 mmol) and the mixture was allowed to cool to 0 °C. Oxalyl chloride (53.0 mg, 0.421 mmol) was added and the solution was allowed to stir for 15 minutes at 22 °C. Diethyl ether (1.0 mL) was added and the mixture was filtered through a cotton plug and concentrated with a stream of nitrogen to deliver 5-hexenyl chloride. In another 50-mL round bottom flask, aminol (120 mg, 0.337 mmol) and triethylamine (170 mg, 0.217 mL, 1.69 mmol) were dissolved in dichloromethane (15 mL) and allowed to cool to –20 °C; a pre-cooled solution of 5-hexenyl chloride in dichloromethane was then introduced by syringe. The mixture was allowed to slowly warm to 22 °C over 30 minutes and allowed to stir for three hours. The resulting mixture was concentrated by vacuum to afford a yellow oil, which was purified by silica gel chromatography (1:1 hexanes: ethyl acetate to 9:1 ethyl acetate: methanol) to afford primary alcohol **Nak-K** as a white solid (84.0 mg, 0.283 mmol, 84% yield, *Z:E* = 95:5). M.p.

147-149 °C; **IR (neat)**: 3350 (br, m), 2923 (s), 2854 (s), 1628 (s), 1549 (m), 1490 (m), 1440 (s), 1353 (m), 1326 (m), 1218 (m), 1203 (m), 1099 (m), 1080 (m), 911 (m), 805 (m), 750 (m); **<sup>1</sup>H NMR (400 MHz, CDCl<sub>3</sub>)**: δ 6.04 (1H, d, *J* = 9.2 Hz), 5.87 (1H, s), 5.84-5.76 (1H, m), 5.46 (1H, dt, *J* = 8.8, 9.2 Hz), 5.26 (1H, dt, *J* = 8.0, 9.0 Hz), 5.07-4.95 (2H, m), 4.91 (1H, s), 4.45 (1H, dt, *J* = 12.8, 4.0 Hz), 4.26-4.19 (1H, m), 3.75-3.62 (2H, m), 3.32 (1H, t, *J* = 2.8 Hz), 3.11 (1H, dt, *J* = 12.0, 4.0 Hz), 2.93 (1H, dd, *J* = 12.4, 4.8 Hz), 2.78-2.67 (1H, m), 2.60-2.39 (5H, m), 2.30-2.11 (5H, m), 2.02-1.89 (3H, m), 1.81-1.43 (4H, m), 1.33-1.22 (1H, m), 1.05-0.95 (1H, m), -0.01-0.12 (1H, m); **<sup>13</sup>C NMR (100 MHz, CDCl<sub>3</sub>)**: δ 174.8, 171.2, 161.1, 155.4, 138.2, 130.5, 130.5, 128.5, 115.2, 103.6, 68.9, 68.2, 66.6, 66.4, 46.8, 43.2, 39.2, 35.1, 34.5, 33.4, 28.7, 27.5, 26.5, 26.3, 25.4, 24.3, 22.3; **HRMS (ESI<sup>+</sup>) [M+H]<sup>+</sup>** calcd for C<sub>27</sub>H<sub>37</sub>N<sub>2</sub>O<sub>4</sub>: 453.2753, found: 453.2739; **[α]<sub>D</sub><sup>20</sup>** -48.67 (*c* = 0.260, CHCl<sub>3</sub>).

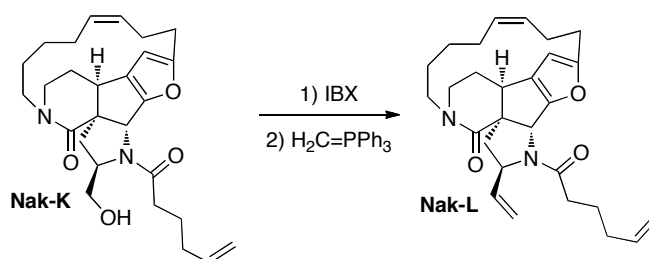

**Triene Nak-L.** In a 50-mL round bottom flask equipped with a magnetic stir bar, 2-iodoxybenzoic acid (413 mg, 1.47 mmol) was added to a solution of the alcohol (148 mg, 0.327 mmol) in DMSO (20 mL). The reaction mixture was allowed to stir at 22 °C for 24 hours, at which time it was poured into a saturated aqueous solution of NaHCO<sub>3</sub> (60 mL) and washed with diethyl ether (4 x 60 mL). The combined organic layers were washed with water (30 mL), dried with Na<sub>2</sub>SO<sub>4</sub> and concentrated to afford the desired aldehyde as a yellow oil, which was used directly for the next step without purification. In a 50-mL round bottom flask, KO<sup>*t*</sup>-Bu (172 mg, 1.54 mmol) was added to MePPh<sub>3</sub>Br (700 mg, 1.96 mmol) in toluene (10 mL). The resulting mixture was placed in a sonication bath until a homogenous bright yellow solution formed. The mixture was allowed to stir at 22 °C for 90 minutes. The unpurified aldehyde was dissolved in THF (10 mL) and the solution was rapidly added to the aforementioned freshly prepared ylide solution. After 15 minutes, the mixture was concentrated; 30 mL water and 30 mL ethyl acetate were added. Layers were partitioned and the aqueous layer was washed three times with ethyl acetate (30 mL). The combined organic layers were dried with Na<sub>2</sub>SO<sub>4</sub> and concentrated by vacuum to afford a colorless oil, which was purified by silica gel chromatography (3:2 to 2:3 hexanes: ethyl acetate) to afford the triene **Nak-L** as a white foam (122 mg, 0.272 mmol, 83% yield, *Z*:*E* = 95:5). **IR (neat)**: 2934 (s), 2863 (s), 1633 (s), 1488 (m), 1440 (s), 1406 (s), 1355 (s), 1287 (s), 1206 (s), 1168 (m), 992 (m), 953 (m), 912 (m), 732 (m); **<sup>1</sup>H NMR (400 MHz, CDCl<sub>3</sub>)**: (characterized as a mixture of two rotamers) δ 5.96-5.68 (3H, m), 5.48 (1H, dt, *J* = 9.2, 9.0 Hz), 5.28 (1H, dt, *J* = 8.8, 8.2 Hz), 5.20-4.89 (5H, m), 4.67-4.44 (2H, m), 3.34 (1H, s), 3.21-3.12 (1H, m), 3.00-2.69 (2H, m), 2.59-2.32 (5H, m), 2.20-1.92 (7H, m), 1.79-1.43 (5H, m), 1.34-1.18 (1H, m), 1.06-0.98 (1H, m), 0.04-0.08 (1H, m); **<sup>13</sup>C NMR (100 MHz, CDCl<sub>3</sub>)**: (characterized as a mixture of two rotamers) δ 173.1, 172.5, 171.5, 171.3, 160.6, 160.1, 157.6, 156.0, 140.3, 139.6, 138.6, 138.6, 130.5, 130.3, 129.9, 129.1, 128.6, 128.2, 115.5, 114.9, 114.9, 113.9, 103.5, 103.0,

70.4, 68.3, 67.6, 67.0, 63.5, 63.3, 46.9, 43.4, 39.9, 39.6, 39.1, 38.3, 34.5, 34.4, 33.4, 33.3, 28.8, 28.7, 27.5, 27.2, 26.6, 26.4, 26.2, 25.5, 25.3, 24.3, 24.2, 22.4, 22.2; **HRMS (ESI<sup>+</sup>) [M+H]<sup>+</sup>** calcd for C<sub>28</sub>H<sub>37</sub>N<sub>2</sub>O<sub>3</sub>: 449.2804, found: 449.2790; [ $\alpha$ ]<sub>D</sub><sup>20</sup> -76.61 (c = 0.110, CHCl<sub>3</sub>).

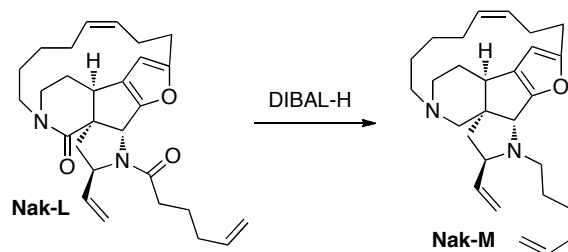

**Diamine Nak-M.** In a 25-mL round bottom flask equipped with a magnetic stir bar, DIBAL-H (159  $\mu$ L, 0.893 mmol) was added to a solution of amide (20.0 mg, 0.0446 mmol) in 5.0 mL diethyl ether at 0 °C and allowed to stir for four hours. A second portion of DIBAL-H (159  $\mu$ L, 0.893 mmol) was added and the mixture was allowed to warm to 22 °C and stir for two hours. A saturated aqueous solution of Rochelle salt (5 mL) was added at -78 °C and the mixture was allowed to warm to 22 °C and stir for six hours. The layers were partitioned and the aqueous fraction was washed three times with diethyl ether (10 mL). The combined organic layers were dried with Na<sub>2</sub>SO<sub>4</sub> and concentrated by vacuum to afford a colorless oil, which was purified by neutral alumina chromatography (10:1 to 2:1 hexanes: diethyl ether) to afford diamine **Nak-M** as a colorless oil (14.0 mg, 0.0333 mmol, 75% yield, *Z:E* = 95:5). **IR (neat)**: 3075 (m), 3003 (m), 2921 (s), 2856 (s), 2974 (s), 1641 (s), 1556 (m), 1445 (s), 1385 (m), 1359 (m), 1342 (m), 1172 (s), 1129 (s), 1100 (m), 1084 (m), 992 (s), 910 (s), 857 (m), 793 (m), 726 (m); **<sup>1</sup>H NMR (400 MHz, CDCl<sub>3</sub>)**:  $\delta$  5.94-5.83 (1H, m), 5.78 (1H, s), 5.69-5.60 (1H, m), 5.48 (1H, dt, *J* = 8.0, 9.0 Hz), 5.26 (1H, dt, *J* = 7.6, 9.2 Hz), 5.14-4.94 (4H, m), 4.16 (1H, s), 3.14-3.08 (1H, m), 3.00 (1H, d, *J* = 10.8 Hz), 2.78-2.70 (2H, m), 2.65-2.43 (4H, m), 2.41 (1H, dt, *J* = 11.6, 3.2 Hz), 2.32-2.09 (6H, m), 2.00-1.84 (3H, m), 1.77 (1H, ddd, *J* = 14.0, 7.2, 2.4 Hz), 1.70-1.53 (3H, m), 1.50-1.38 (2H, m), 1.36-1.25 (2H, m), 1.08-0.96 (2H, m), 0.94-0.78 (2H, m); **<sup>13</sup>C NMR (100 MHz, CDCl<sub>3</sub>)**:  $\delta$  160.6, 156.2, 140.9, 139.5, 133.6, 131.7, 128.1, 116.8, 114.2, 103.3, 71.0, 66.8, 62.6, 59.6, 58.4, 49.9, 45.1, 42.7, 41.4, 33.8, 28.9, 28.3, 27.9, 27.7, 27.2, 26.5, 26.3, 22.3; **HRMS (ESI<sup>+</sup>) [M+H]<sup>+</sup>** calcd for C<sub>28</sub>H<sub>41</sub>N<sub>2</sub>O: 421.3219, found: 421.3207; [ $\alpha$ ]<sub>D</sub><sup>20</sup> -30.14 (c = 0.067, methanol).

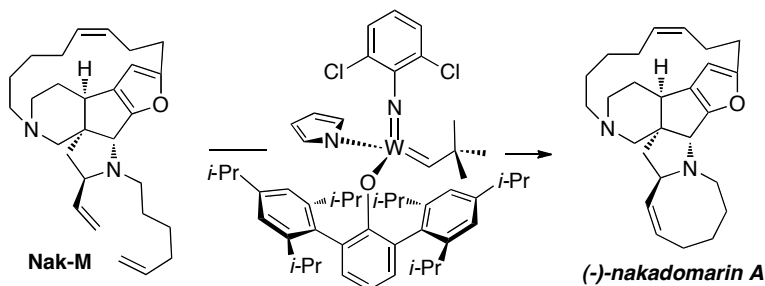

**Nakadomarin A through a W-catalyzed RCM.** In an N<sub>2</sub>-filled glove box, diamine (8.0 mg, 0.019 mmol) was charged to an 8-mL vial, which was dissolved in toluene (3.8 mL) and treated

with a stock solution of W complex **10** (93  $\mu\text{L}$ , 0.00095 mmol, 1 mg/mL, 0.05 equivalent). The resulting mixture was allowed to stir for three minutes to allow complete initiation of the catalyst. The vial was capped with a septum fitted with two 20-gauge needles and connected to a one torr vacuum generated from the Edwards RV8 two-stage rotary vane pump. The solution was allowed to stir at 22  $^{\circ}\text{C}$  for eight hours; it was then removed from the glovebox and exposed to air. The resulting oil was purified by silica gel chromatography (19:1 diethyl ether: ammonium hydroxide) to afford nakadomarin A as a white foam (4.2 mg, 0.011 mmol, 56% yield, *Z:E* = 91:9) together with recovered diamine starting material (1.0 mg, 0.0023 mmol, 12% recovery). The physical and spectral data of the desired product were identical to those previously reported<sup>15</sup>. **IR (neat)**: 3005 (m), 2923 (s), 2856 (s), 2790 (s), 2742 (s), 1444 (s), 1357 (m), 1330 (m), 1309 (m), 1276 (m), 1238 (m), 1196 (m), 1132 (s), 1080 (m), 953 (m), 937 (s), 725 (m); **<sup>1</sup>H NMR (400 MHz, CD<sub>3</sub>OD)**:  $\delta$  5.86 (1H, s), 5.79 (1H, dd, *J* = 17.6, 9.4 Hz), 5.51-5.40 (2H, m), 5.28-5.21 (1H, m), 3.92 (1H, s), 3.74-3.69 (1H, m), 3.08-2.98 (1H, m), 3.03 (1H, d, *J* = 12.4 Hz), 2.83 (1H, br, s), 2.80-2.68 (2H, m), 2.64-2.57 (2H, m), 2.52-2.44 (1H, m), 2.40 (1H, dd, *J* = 11.6, 3.6 Hz), 2.34-2.26 (3H, m), 2.18-1.95 (4H, m), 1.90 (2H, dd, *J* = 12.4, 4.8 Hz), 1.81 (1H, ddd, *J* = 14.0, 7.2, 2.6 Hz), 1.74-1.56 (4H, m), 1.47 (1H, dd, *J* = 12.4, 10.0 Hz), 1.42-1.27 (2H, m), 1.11-1.00 (2H, m), 0.92-0.88 (1H, m); **<sup>13</sup>C NMR (100 MHz, CD<sub>3</sub>OD)**:  $\delta$  162.3, 156.7, 135.1, 134.4, 132.2, 131.6, 129.3, 104.7, 74.7, 63.6, 60.7, 59.3, 58.2, 50.9, 46.1, 43.5, 43.1, 29.5, 29.2, 29.2, 28.8, 27.2, 27.1, 26.0, 26.0, 23.0; **HRMS (ESI<sup>+</sup>) [M+H]<sup>+</sup>** calcd for C<sub>26</sub>H<sub>37</sub>N<sub>2</sub>O: 393.2906, found: 393.2899;  $[\alpha]_{\text{D}}^{20}$  -73.59 (*c* = 0.040, methanol).

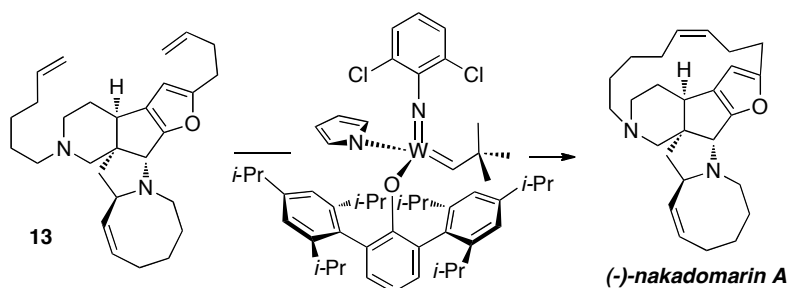

**Nakadomarin A through a W-catalyzed macrocyclic RCM of 13.** In an N<sub>2</sub>-filled glove box, diamine **13** (8.0 mg, 0.019 mmol) was charged to a 35-mL vial, which was dissolved in toluene (19 mL) and treated with a stock solution of W complex **10** (93  $\mu\text{L}$ , 0.00095 mmol, 1.0 mg/mL, 0.05 equivalent). The resulting mixture was allowed to stir for three minutes to allow complete initiation of the catalyst. The vial was capped with a septum fitted with two 20-gauge needles and connected to a one torr vacuum generated from a mechanic pump. The solution was allowed to stir at 22  $^{\circ}\text{C}$  for six hours; it was then removed from the glovebox and exposed to air. The resulting oil was purified by silica gel chromatography (19:1 diethyl ether: ammonium hydroxide) to afford nakadomarin A as a white foam (4.7 mg, 0.012 mmol, 63% yield, *Z:E* = 95:5) together with recovered diamine starting material **13** (0.7 mg, 0.002 mmol, 9% recovery).

(15) (a) Ono, K.; Nakagawa, M.; Nishida, A. *Angew. Chem. Int. Ed.* **2004**, *43*, 2020–2023. (b) Ref 4. (c) Nilson, M. G.; Funk, R. L. *Org. Lett.* **2010**, *12*, 4912–4915.

■ **Proof of Stereochemistry:** The identity of the major isomer **6** from W-catalyzed macrocyclic RCM was established through X-ray crystallography (see below).

**X-ray structure of RCM product 6**

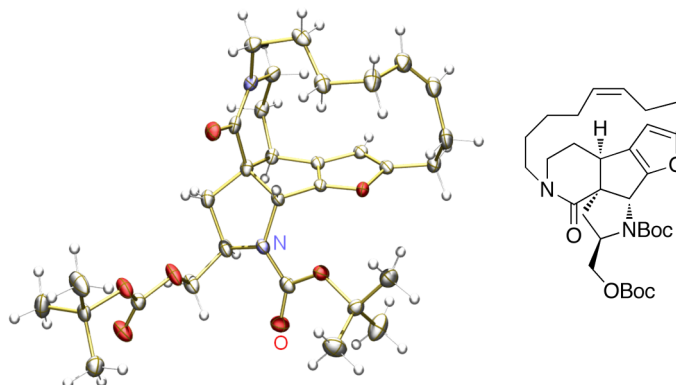

**Table 1. Crystal data and structure refinement for C<sub>31</sub>H<sub>44</sub>N<sub>2</sub>O<sub>7</sub>**

|                                 |                                                               |                 |
|---------------------------------|---------------------------------------------------------------|-----------------|
| Identification code             | C31H44N2O7                                                    |                 |
| Empirical formula               | C <sub>31</sub> H <sub>44</sub> N <sub>2</sub> O <sub>7</sub> |                 |
| Formula weight                  | 556.68                                                        |                 |
| Temperature                     | 100(2) K                                                      |                 |
| Wavelength                      | 1.54178 Å                                                     |                 |
| Crystal system                  | Monoclinic                                                    |                 |
| Space group                     | P 2(1)                                                        |                 |
| Unit cell dimensions            | a = 10.342(3) Å                                               | α = 90°         |
|                                 | b = 9.907(3) Å                                                | β = 93.895(12)° |
|                                 | c = 14.462(5) Å                                               | γ = 90°         |
| Volume                          | 1478.2(8) Å <sup>3</sup>                                      |                 |
| Z                               | 2                                                             |                 |
| Density (calculated)            | 1.251 Mg/m <sup>3</sup>                                       |                 |
| Absorption coefficient          | 0.716 mm <sup>-1</sup>                                        |                 |
| F(000)                          | 600                                                           |                 |
| Crystal size                    | 0.20 x 0.12 x 0.05 mm <sup>3</sup>                            |                 |
| Theta range for data collection | 3.06 to 67.47°                                                |                 |
| Index ranges                    | -12 ≤ h ≤ 12, -11 ≤ k ≤ 11, -17 ≤ l ≤ 10                      |                 |
| Reflections collected           | 15917                                                         |                 |
| Independent reflections         | 5100 [R(int) = 0.0382]                                        |                 |
| Completeness to theta = 67.47°  | 98.0 %                                                        |                 |



|                                   |                                             |
|-----------------------------------|---------------------------------------------|
| Absorption correction             | Semi-empirical from equivalents             |
| Max. and min. transmission        | 0.9651 and 0.8701                           |
| Refinement method                 | Full-matrix least-squares on F <sup>2</sup> |
| Data / restraints / parameters    | 5100 / 1 / 367                              |
| Goodness-of-fit on F <sup>2</sup> | 1.097                                       |
| Final R indices [I>2sigma(I)]     | R1 = 0.0293, wR2 = 0.0787                   |
| R indices (all data)              | R1 = 0.0778, wR2 = 0.0915                   |
| Absolute structure parameter      | 0.02(14)                                    |
| Extinction coefficient            | na                                          |
| Largest diff. peak and hole       | 0.365 and -0.302 e. <sup>≈</sup> -3         |

**Table 2. Atomic coordinates ( $\times 10^4$ ) and equivalent isotropic displacement parameters ( $\approx 2 \times 10^3$ ).  $U(\text{eq})$  is defined as one third of the trace of the orthogonalized  $U_{ij}$  tensor**

|       | x       | y        | z       | $U(\text{eq})$ |
|-------|---------|----------|---------|----------------|
| O(1)  | 4527(1) | 8673(1)  | 8644(1) | 20(1)          |
| O(2)  | 4447(1) | 6117(1)  | 5694(1) | 27(1)          |
| O(3)  | 1883(1) | 7772(1)  | 8390(1) | 26(1)          |
| O(4)  | 1069(1) | 5782(2)  | 8899(1) | 31(1)          |
| O(5)  | 1230(1) | 4069(1)  | 6696(1) | 32(1)          |
| O(6)  | -222(1) | 2376(2)  | 6662(1) | 35(1)          |
| O(7)  | -91(1)  | 3894(2)  | 5490(1) | 30(1)          |
| N(1)  | 6478(2) | 6505(2)  | 6312(1) | 22(1)          |
| N(2)  | 2747(2) | 5852(2)  | 7953(1) | 22(1)          |
| C(1)  | 6779(2) | 7403(2)  | 5541(1) | 27(1)          |
| C(2)  | 6893(2) | 8881(2)  | 5860(1) | 29(1)          |
| C(3)  | 5723(2) | 9348(2)  | 6349(1) | 29(1)          |
| C(4)  | 5740(2) | 10823(2) | 6691(1) | 34(1)          |
| C(5)  | 6858(2) | 11124(2) | 7363(1) | 32(1)          |
| C(6)  | 6840(2) | 11362(2) | 8270(1) | 32(1)          |
| C(7)  | 5721(2) | 11376(2) | 8878(1) | 30(1)          |
| C(8)  | 5813(2) | 10236(2) | 9610(1) | 27(1)          |
| C(9)  | 5670(2) | 8874(2)  | 9191(1) | 22(1)          |
| C(10) | 4644(2) | 7410(2)  | 8283(1) | 19(1)          |
| C(11) | 3803(2) | 6648(2)  | 7584(1) | 20(1)          |
| C(12) | 2944(2) | 4399(2)  | 7883(1) | 24(1)          |
| C(13) | 3983(2) | 4279(2)  | 7177(1) | 25(1)          |
| C(14) | 4793(2) | 5559(2)  | 7293(1) | 21(1)          |
| C(15) | 5259(2) | 6058(2)  | 6358(1) | 21(1)          |
| C(16) | 7503(2) | 6364(2)  | 7050(1) | 25(1)          |
| C(17) | 7213(2) | 5242(2)  | 7712(1) | 25(1)          |
| C(18) | 5898(2) | 5477(2)  | 8100(1) | 21(1)          |
| C(19) | 5761(2) | 6825(2)  | 8568(1) | 20(1)          |
| C(20) | 6436(2) | 7770(2)  | 9180(1) | 21(1)          |
| C(21) | 1826(2) | 6417(2)  | 8457(1) | 24(1)          |

|       |          |          |         |       |
|-------|----------|----------|---------|-------|
| C(22) | 1049(2)  | 8661(2)  | 8908(1) | 25(1) |
| C(23) | 1480(2)  | 10064(2) | 8651(2) | 34(1) |
| C(24) | 1278(3)  | 8410(3)  | 9943(2) | 46(1) |
| C(25) | -350(2)  | 8446(3)  | 8567(2) | 41(1) |
| C(26) | 1735(2)  | 3589(2)  | 7596(1) | 28(1) |
| C(27) | 236(2)   | 3339(2)  | 6309(1) | 24(1) |
| C(28) | -1180(2) | 3327(2)  | 4880(1) | 25(1) |
| C(29) | -2425(2) | 3474(2)  | 5351(1) | 32(1) |
| C(30) | -902(2)  | 1884(2)  | 4637(2) | 38(1) |
| C(31) | -1173(2) | 4238(3)  | 4038(1) | 43(1) |

---

**Table 3. Bond lengths [ $\approx$ ] and angles [ $\infty$ ]**

---

|            |          |
|------------|----------|
| O(1)-C(10) | 1.365(2) |
| O(1)-C(9)  | 1.391(2) |
| O(2)-C(15) | 1.232(2) |
| O(3)-C(21) | 1.347(3) |
| O(3)-C(22) | 1.473(2) |
| O(4)-C(21) | 1.220(2) |
| O(5)-C(27) | 1.347(2) |
| O(5)-C(26) | 1.450(2) |
| O(6)-C(27) | 1.195(2) |
| O(7)-C(27) | 1.328(2) |
| O(7)-C(28) | 1.493(2) |
| N(1)-C(15) | 1.342(3) |
| N(1)-C(16) | 1.459(2) |
| N(1)-C(1)  | 1.476(2) |
| N(2)-C(21) | 1.359(2) |
| N(2)-C(12) | 1.457(3) |
| N(2)-C(11) | 1.476(2) |
| C(1)-C(2)  | 1.537(3) |
| C(1)-H(1A) | 0.9900   |
| C(1)-H(1B) | 0.9900   |
| C(2)-C(3)  | 1.514(3) |
| C(2)-H(2A) | 0.9900   |
| C(2)-H(2B) | 0.9900   |
| C(3)-C(4)  | 1.542(3) |
| C(3)-H(3A) | 0.9900   |
| C(3)-H(3B) | 0.9900   |
| C(4)-C(5)  | 1.489(3) |
| C(4)-H(4A) | 0.9900   |
| C(4)-H(4B) | 0.9900   |
| C(5)-C(6)  | 1.334(3) |
| C(5)-H(5)  | 0.9500   |
| C(6)-C(7)  | 1.501(3) |
| C(6)-H(6)  | 0.9500   |

|              |          |
|--------------|----------|
| C(7)-C(8)    | 1.547(3) |
| C(7)-H(7A)   | 0.9900   |
| C(7)-H(7B)   | 0.9900   |
| C(8)-C(9)    | 1.482(3) |
| C(8)-H(8A)   | 0.9900   |
| C(8)-H(8B)   | 0.9900   |
| C(9)-C(20)   | 1.352(3) |
| C(10)-C(19)  | 1.332(3) |
| C(10)-C(11)  | 1.492(2) |
| C(11)-C(14)  | 1.565(3) |
| C(11)-H(11)  | 1.0000   |
| C(12)-C(26)  | 1.519(3) |
| C(12)-C(13)  | 1.537(3) |
| C(12)-H(12)  | 1.0000   |
| C(13)-C(14)  | 1.522(3) |
| C(13)-H(13A) | 0.9900   |
| C(13)-H(13B) | 0.9900   |
| C(14)-C(15)  | 1.547(2) |
| C(14)-C(18)  | 1.580(2) |
| C(16)-C(17)  | 1.510(3) |
| C(16)-H(16A) | 0.9900   |
| C(16)-H(16B) | 0.9900   |
| C(17)-C(18)  | 1.524(3) |
| C(17)-H(17A) | 0.9900   |
| C(17)-H(17B) | 0.9900   |
| C(18)-C(19)  | 1.508(3) |
| C(18)-H(18)  | 1.0000   |
| C(19)-C(20)  | 1.437(3) |
| C(20)-H(20)  | 0.9500   |
| C(22)-C(25)  | 1.512(3) |
| C(22)-C(23)  | 1.513(3) |
| C(22)-C(24)  | 1.519(3) |
| C(23)-H(23A) | 0.9800   |
| C(23)-H(23B) | 0.9800   |
| C(23)-H(23C) | 0.9800   |
| C(24)-H(24A) | 0.9800   |

|                  |            |
|------------------|------------|
| C(24)-H(24B)     | 0.9800     |
| C(24)-H(24C)     | 0.9800     |
| C(25)-H(25A)     | 0.9800     |
| C(25)-H(25B)     | 0.9800     |
| C(25)-H(25C)     | 0.9800     |
| C(26)-H(26A)     | 0.9900     |
| C(26)-H(26B)     | 0.9900     |
| C(28)-C(29)      | 1.504(3)   |
| C(28)-C(30)      | 1.504(3)   |
| C(28)-C(31)      | 1.517(3)   |
| C(29)-H(29A)     | 0.9800     |
| C(29)-H(29B)     | 0.9800     |
| C(29)-H(29C)     | 0.9800     |
| C(30)-H(30A)     | 0.9800     |
| C(30)-H(30B)     | 0.9800     |
| C(30)-H(30C)     | 0.9800     |
| C(31)-H(31A)     | 0.9800     |
| C(31)-H(31B)     | 0.9800     |
| C(31)-H(31C)     | 0.9800     |
|                  |            |
| C(10)-O(1)-C(9)  | 104.77(14) |
| C(21)-O(3)-C(22) | 121.99(15) |
| C(27)-O(5)-C(26) | 114.50(15) |
| C(27)-O(7)-C(28) | 120.47(15) |
| C(15)-N(1)-C(16) | 124.74(15) |
| C(15)-N(1)-C(1)  | 118.93(15) |
| C(16)-N(1)-C(1)  | 115.49(15) |
| C(21)-N(2)-C(12) | 123.39(16) |
| C(21)-N(2)-C(11) | 122.40(16) |
| C(12)-N(2)-C(11) | 113.14(15) |
| N(1)-C(1)-C(2)   | 111.27(14) |
| N(1)-C(1)-H(1A)  | 109.4      |
| C(2)-C(1)-H(1A)  | 109.4      |
| N(1)-C(1)-H(1B)  | 109.4      |
| C(2)-C(1)-H(1B)  | 109.4      |
| H(1A)-C(1)-H(1B) | 108.0      |

|                  |            |
|------------------|------------|
| C(3)-C(2)-C(1)   | 112.56(17) |
| C(3)-C(2)-H(2A)  | 109.1      |
| C(1)-C(2)-H(2A)  | 109.1      |
| C(3)-C(2)-H(2B)  | 109.1      |
| C(1)-C(2)-H(2B)  | 109.1      |
| H(2A)-C(2)-H(2B) | 107.8      |
| C(2)-C(3)-C(4)   | 116.55(18) |
| C(2)-C(3)-H(3A)  | 108.2      |
| C(4)-C(3)-H(3A)  | 108.2      |
| C(2)-C(3)-H(3B)  | 108.2      |
| C(4)-C(3)-H(3B)  | 108.2      |
| H(3A)-C(3)-H(3B) | 107.3      |
| C(5)-C(4)-C(3)   | 112.98(19) |
| C(5)-C(4)-H(4A)  | 109.0      |
| C(3)-C(4)-H(4A)  | 109.0      |
| C(5)-C(4)-H(4B)  | 109.0      |
| C(3)-C(4)-H(4B)  | 109.0      |
| H(4A)-C(4)-H(4B) | 107.8      |
| C(6)-C(5)-C(4)   | 128.0(2)   |
| C(6)-C(5)-H(5)   | 116.0      |
| C(4)-C(5)-H(5)   | 116.0      |
| C(5)-C(6)-C(7)   | 129.8(2)   |
| C(5)-C(6)-H(6)   | 115.1      |
| C(7)-C(6)-H(6)   | 115.1      |
| C(6)-C(7)-C(8)   | 112.36(18) |
| C(6)-C(7)-H(7A)  | 109.1      |
| C(8)-C(7)-H(7A)  | 109.1      |
| C(6)-C(7)-H(7B)  | 109.1      |
| C(8)-C(7)-H(7B)  | 109.1      |
| H(7A)-C(7)-H(7B) | 107.9      |
| C(9)-C(8)-C(7)   | 112.61(15) |
| C(9)-C(8)-H(8A)  | 109.1      |
| C(7)-C(8)-H(8A)  | 109.1      |
| C(9)-C(8)-H(8B)  | 109.1      |
| C(7)-C(8)-H(8B)  | 109.1      |
| H(8A)-C(8)-H(8B) | 107.8      |

|                     |            |
|---------------------|------------|
| C(20)-C(9)-O(1)     | 110.71(16) |
| C(20)-C(9)-C(8)     | 134.36(18) |
| O(1)-C(9)-C(8)      | 114.84(16) |
| C(19)-C(10)-O(1)    | 112.20(15) |
| C(19)-C(10)-C(11)   | 116.28(17) |
| O(1)-C(10)-C(11)    | 131.29(17) |
| N(2)-C(11)-C(10)    | 115.93(14) |
| N(2)-C(11)-C(14)    | 103.99(14) |
| C(10)-C(11)-C(14)   | 99.74(15)  |
| N(2)-C(11)-H(11)    | 112.1      |
| C(10)-C(11)-H(11)   | 112.1      |
| C(14)-C(11)-H(11)   | 112.1      |
| N(2)-C(12)-C(26)    | 115.14(17) |
| N(2)-C(12)-C(13)    | 103.29(15) |
| C(26)-C(12)-C(13)   | 112.16(16) |
| N(2)-C(12)-H(12)    | 108.7      |
| C(26)-C(12)-H(12)   | 108.7      |
| C(13)-C(12)-H(12)   | 108.7      |
| C(14)-C(13)-C(12)   | 105.49(15) |
| C(14)-C(13)-H(13A)  | 110.6      |
| C(12)-C(13)-H(13A)  | 110.6      |
| C(14)-C(13)-H(13B)  | 110.6      |
| C(12)-C(13)-H(13B)  | 110.6      |
| H(13A)-C(13)-H(13B) | 108.8      |
| C(13)-C(14)-C(15)   | 111.84(15) |
| C(13)-C(14)-C(11)   | 103.83(15) |
| C(15)-C(14)-C(11)   | 105.25(14) |
| C(13)-C(14)-C(18)   | 113.81(15) |
| C(15)-C(14)-C(18)   | 114.16(15) |
| C(11)-C(14)-C(18)   | 106.86(13) |
| O(2)-C(15)-N(1)     | 122.51(16) |
| O(2)-C(15)-C(14)    | 117.37(17) |
| N(1)-C(15)-C(14)    | 119.91(15) |
| N(1)-C(16)-C(17)    | 111.67(16) |
| N(1)-C(16)-H(16A)   | 109.3      |
| C(17)-C(16)-H(16A)  | 109.3      |



|                     |            |
|---------------------|------------|
| N(1)-C(16)-H(16B)   | 109.3      |
| C(17)-C(16)-H(16B)  | 109.3      |
| H(16A)-C(16)-H(16B) | 107.9      |
| C(16)-C(17)-C(18)   | 109.94(16) |
| C(16)-C(17)-H(17A)  | 109.7      |
| C(18)-C(17)-H(17A)  | 109.7      |
| C(16)-C(17)-H(17B)  | 109.7      |
| C(18)-C(17)-H(17B)  | 109.7      |
| H(17A)-C(17)-H(17B) | 108.2      |
| C(19)-C(18)-C(17)   | 114.48(16) |
| C(19)-C(18)-C(14)   | 101.55(14) |
| C(17)-C(18)-C(14)   | 110.80(14) |
| C(19)-C(18)-H(18)   | 109.9      |
| C(17)-C(18)-H(18)   | 109.9      |
| C(14)-C(18)-H(18)   | 109.9      |
| C(10)-C(19)-C(20)   | 106.40(16) |
| C(10)-C(19)-C(18)   | 110.67(15) |
| C(20)-C(19)-C(18)   | 142.80(18) |
| C(9)-C(20)-C(19)    | 105.88(16) |
| C(9)-C(20)-H(20)    | 127.1      |
| C(19)-C(20)-H(20)   | 127.1      |
| O(4)-C(21)-O(3)     | 125.78(19) |
| O(4)-C(21)-N(2)     | 124.54(19) |
| O(3)-C(21)-N(2)     | 109.68(16) |
| O(3)-C(22)-C(25)    | 109.26(17) |
| O(3)-C(22)-C(23)    | 103.45(15) |
| C(25)-C(22)-C(23)   | 109.91(18) |
| O(3)-C(22)-C(24)    | 110.22(17) |
| C(25)-C(22)-C(24)   | 112.3(2)   |
| C(23)-C(22)-C(24)   | 111.32(19) |
| C(22)-C(23)-H(23A)  | 109.5      |
| C(22)-C(23)-H(23B)  | 109.5      |
| H(23A)-C(23)-H(23B) | 109.5      |
| C(22)-C(23)-H(23C)  | 109.5      |
| H(23A)-C(23)-H(23C) | 109.5      |
| H(23B)-C(23)-H(23C) | 109.5      |

|                     |            |
|---------------------|------------|
| C(22)-C(24)-H(24A)  | 109.5      |
| C(22)-C(24)-H(24B)  | 109.5      |
| H(24A)-C(24)-H(24B) | 109.5      |
| C(22)-C(24)-H(24C)  | 109.5      |
| H(24A)-C(24)-H(24C) | 109.5      |
| H(24B)-C(24)-H(24C) | 109.5      |
| C(22)-C(25)-H(25A)  | 109.5      |
| C(22)-C(25)-H(25B)  | 109.5      |
| H(25A)-C(25)-H(25B) | 109.5      |
| C(22)-C(25)-H(25C)  | 109.5      |
| H(25A)-C(25)-H(25C) | 109.5      |
| H(25B)-C(25)-H(25C) | 109.5      |
| O(5)-C(26)-C(12)    | 108.14(15) |
| O(5)-C(26)-H(26A)   | 110.1      |
| C(12)-C(26)-H(26A)  | 110.1      |
| O(5)-C(26)-H(26B)   | 110.1      |
| C(12)-C(26)-H(26B)  | 110.1      |
| H(26A)-C(26)-H(26B) | 108.4      |
| O(6)-C(27)-O(7)     | 128.85(18) |
| O(6)-C(27)-O(5)     | 124.38(17) |
| O(7)-C(27)-O(5)     | 106.77(16) |
| O(7)-C(28)-C(29)    | 109.31(15) |
| O(7)-C(28)-C(30)    | 110.30(17) |
| C(29)-C(28)-C(30)   | 112.44(17) |
| O(7)-C(28)-C(31)    | 101.86(15) |
| C(29)-C(28)-C(31)   | 110.92(18) |
| C(30)-C(28)-C(31)   | 111.50(18) |
| C(28)-C(29)-H(29A)  | 109.5      |
| C(28)-C(29)-H(29B)  | 109.5      |
| H(29A)-C(29)-H(29B) | 109.5      |
| C(28)-C(29)-H(29C)  | 109.5      |
| H(29A)-C(29)-H(29C) | 109.5      |
| H(29B)-C(29)-H(29C) | 109.5      |
| C(28)-C(30)-H(30A)  | 109.5      |
| C(28)-C(30)-H(30B)  | 109.5      |
| H(30A)-C(30)-H(30B) | 109.5      |

|                     |       |
|---------------------|-------|
| C(28)-C(30)-H(30C)  | 109.5 |
| H(30A)-C(30)-H(30C) | 109.5 |
| H(30B)-C(30)-H(30C) | 109.5 |
| C(28)-C(31)-H(31A)  | 109.5 |
| C(28)-C(31)-H(31B)  | 109.5 |
| H(31A)-C(31)-H(31B) | 109.5 |
| C(28)-C(31)-H(31C)  | 109.5 |
| H(31A)-C(31)-H(31C) | 109.5 |
| H(31B)-C(31)-H(31C) | 109.5 |

---

Symmetry transformations used to generate equivalent atoms:

**Table 4. Anisotropic displacement parameters ( $\approx 2 \times 10^3$ ). The anisotropic displacement factor exponent takes the form:  $-2\pi^2 [h^2 a^{*2} U^{11} + \dots + 2 h k a^* b^* U^{12}]$**

|       | $U^{11}$ | $U^{22}$ | $U^{33}$ | $U^{23}$ | $U^{13}$ | $U^{12}$ |
|-------|----------|----------|----------|----------|----------|----------|
| O(1)  | 21(1)    | 19(1)    | 22(1)    | -4(1)    | 4(1)     | -1(1)    |
| O(2)  | 30(1)    | 30(1)    | 20(1)    | 0(1)     | -2(1)    | -2(1)    |
| O(3)  | 23(1)    | 23(1)    | 32(1)    | 0(1)     | 6(1)     | -3(1)    |
| O(4)  | 30(1)    | 31(1)    | 34(1)    | 5(1)     | 8(1)     | -5(1)    |
| O(5)  | 40(1)    | 27(1)    | 27(1)    | 6(1)     | -11(1)   | -17(1)   |
| O(6)  | 34(1)    | 33(1)    | 35(1)    | 8(1)     | -8(1)    | -12(1)   |
| O(7)  | 34(1)    | 30(1)    | 24(1)    | 3(1)     | -6(1)    | -13(1)   |
| N(1)  | 24(1)    | 24(1)    | 18(1)    | -1(1)    | 2(1)     | 3(1)     |
| N(2)  | 23(1)    | 18(1)    | 24(1)    | 0(1)     | 1(1)     | -5(1)    |
| C(1)  | 27(1)    | 32(1)    | 21(1)    | 2(1)     | 4(1)     | 1(1)     |
| C(2)  | 30(1)    | 30(1)    | 25(1)    | 9(1)     | -3(1)    | -8(1)    |
| C(3)  | 36(1)    | 26(1)    | 25(1)    | 3(1)     | -1(1)    | -4(1)    |
| C(4)  | 50(1)    | 25(1)    | 27(1)    | 2(1)     | 1(1)     | -1(1)    |
| C(5)  | 41(1)    | 24(1)    | 33(1)    | 1(1)     | 5(1)     | -3(1)    |
| C(6)  | 44(1)    | 22(1)    | 30(1)    | 0(1)     | 3(1)     | -5(1)    |
| C(7)  | 36(1)    | 20(1)    | 34(1)    | -5(1)    | 1(1)     | -4(1)    |
| C(8)  | 32(1)    | 27(1)    | 22(1)    | -6(1)    | 4(1)     | -4(1)    |
| C(9)  | 24(1)    | 26(1)    | 16(1)    | -1(1)    | 3(1)     | -7(1)    |
| C(10) | 22(1)    | 17(1)    | 18(1)    | 0(1)     | 5(1)     | -5(1)    |
| C(11) | 21(1)    | 18(1)    | 21(1)    | 0(1)     | 0(1)     | -3(1)    |
| C(12) | 31(1)    | 20(1)    | 22(1)    | 1(1)     | -2(1)    | -6(1)    |
| C(13) | 33(1)    | 19(1)    | 24(1)    | -1(1)    | 1(1)     | -2(1)    |
| C(14) | 26(1)    | 18(1)    | 18(1)    | 0(1)     | 0(1)     | 0(1)     |
| C(15) | 28(1)    | 18(1)    | 18(1)    | -3(1)    | 0(1)     | 3(1)     |
| C(16) | 23(1)    | 30(1)    | 22(1)    | -1(1)    | 2(1)     | 3(1)     |
| C(17) | 27(1)    | 26(1)    | 21(1)    | -1(1)    | -2(1)    | 6(1)     |
| C(18) | 27(1)    | 17(1)    | 18(1)    | 3(1)     | 1(1)     | 2(1)     |
| C(19) | 22(1)    | 21(1)    | 16(1)    | 2(1)     | 3(1)     | -4(1)    |
| C(20) | 23(1)    | 25(1)    | 16(1)    | 1(1)     | 3(1)     | -3(1)    |
| C(21) | 23(1)    | 27(1)    | 22(1)    | 2(1)     | -3(1)    | -5(1)    |
| C(22) | 21(1)    | 29(1)    | 26(1)    | -2(1)    | 2(1)     | 4(1)     |

|       |       |       |       |        |        |        |
|-------|-------|-------|-------|--------|--------|--------|
| C(23) | 28(1) | 30(1) | 46(1) | -5(1)  | 8(1)   | 4(1)   |
| C(24) | 63(2) | 44(2) | 30(1) | -3(1)  | 1(1)   | 16(1)  |
| C(25) | 23(1) | 44(2) | 57(1) | 5(1)   | 0(1)   | 2(1)   |
| C(26) | 34(1) | 27(1) | 23(1) | 6(1)   | -6(1)  | -9(1)  |
| C(27) | 26(1) | 20(1) | 25(1) | 0(1)   | 1(1)   | -2(1)  |
| C(28) | 25(1) | 26(1) | 22(1) | -5(1)  | -4(1)  | -5(1)  |
| C(29) | 31(1) | 34(1) | 30(1) | -4(1)  | 0(1)   | 2(1)   |
| C(30) | 30(1) | 36(1) | 45(1) | -18(1) | -7(1)  | 7(1)   |
| C(31) | 49(1) | 55(2) | 24(1) | 4(1)   | -11(1) | -24(1) |

---

**Table 5. Hydrogen coordinates ( $\times 10^4$ ) and isotropic displacement parameters ( $\approx 2 \times 10^{-3}$ )**

|        | x    | y     | z     | U(eq) |
|--------|------|-------|-------|-------|
| H(1A)  | 6087 | 7326  | 5036  | 32    |
| H(1B)  | 7605 | 7116  | 5293  | 32    |
| H(2A)  | 7678 | 8983  | 6285  | 34    |
| H(2B)  | 6997 | 9465  | 5315  | 34    |
| H(3A)  | 5628 | 8751  | 6889  | 35    |
| H(3B)  | 4944 | 9221  | 5921  | 35    |
| H(4A)  | 5774 | 11433 | 6151  | 41    |
| H(4B)  | 4924 | 11010 | 6988  | 41    |
| H(5)   | 7685 | 11149 | 7115  | 39    |
| H(6)   | 7661 | 11551 | 8577  | 39    |
| H(7A)  | 4903 | 11276 | 8487  | 36    |
| H(7B)  | 5696 | 12259 | 9197  | 36    |
| H(8A)  | 6662 | 10293 | 9968  | 32    |
| H(8B)  | 5128 | 10369 | 10048 | 32    |
| H(11)  | 3487 | 7231  | 7051  | 24    |
| H(12)  | 3313 | 4057  | 8496  | 29    |
| H(13A) | 4527 | 3470  | 7306  | 30    |
| H(13B) | 3577 | 4214  | 6539  | 30    |
| H(16A) | 7599 | 7224  | 7396  | 30    |
| H(16B) | 8333 | 6173  | 6774  | 30    |
| H(17A) | 7896 | 5211  | 8226  | 30    |
| H(17B) | 7210 | 4364  | 7384  | 30    |
| H(18)  | 5707 | 4733  | 8538  | 25    |
| H(20)  | 7253 | 7644  | 9510  | 26    |
| H(23A) | 1343 | 10188 | 7979  | 52    |
| H(23B) | 2401 | 10177 | 8840  | 52    |
| H(23C) | 973  | 10736 | 8969  | 52    |
| H(24A) | 2200 | 8531  | 10128 | 69    |
| H(24B) | 1018 | 7486  | 10085 | 69    |
| H(24C) | 765  | 9050  | 10282 | 69    |
| H(25A) | -445 | 8580  | 7895  | 62    |

|        |       |      |      |    |
|--------|-------|------|------|----|
| H(25B) | -900  | 9094 | 8870 | 62 |
| H(25C) | -613  | 7525 | 8716 | 62 |
| H(26A) | 1951  | 2617 | 7562 | 34 |
| H(26B) | 1078  | 3707 | 8056 | 34 |
| H(29A) | -2577 | 4430 | 5480 | 48 |
| H(29B) | -2364 | 2968 | 5935 | 48 |
| H(29C) | -3145 | 3121 | 4946 | 48 |
| H(30A) | -912  | 1323 | 5194 | 56 |
| H(30B) | -47   | 1827 | 4385 | 56 |
| H(30C) | -1565 | 1562 | 4172 | 56 |
| H(31A) | -329  | 4178 | 3771 | 65 |
| H(31B) | -1330 | 5173 | 4223 | 65 |
| H(31C) | -1856 | 3953 | 3576 | 65 |

---

**Table 6. Torsion angles [ $^{\circ}$ ]**

|                         |             |
|-------------------------|-------------|
| C(15)-N(1)-C(1)-C(2)    | 102.49(19)  |
| C(16)-N(1)-C(1)-C(2)    | -67.5(2)    |
| N(1)-C(1)-C(2)-C(3)     | -52.5(2)    |
| C(1)-C(2)-C(3)-C(4)     | -179.59(16) |
| C(2)-C(3)-C(4)-C(5)     | -59.5(2)    |
| C(3)-C(4)-C(5)-C(6)     | -109.5(3)   |
| C(4)-C(5)-C(6)-C(7)     | 1.1(4)      |
| C(5)-C(6)-C(7)-C(8)     | 114.6(3)    |
| C(6)-C(7)-C(8)-C(9)     | -66.9(2)    |
| C(10)-O(1)-C(9)-C(20)   | -1.35(18)   |
| C(10)-O(1)-C(9)-C(8)    | 175.83(14)  |
| C(7)-C(8)-C(9)-C(20)    | 119.3(2)    |
| C(7)-C(8)-C(9)-O(1)     | -57.0(2)    |
| C(9)-O(1)-C(10)-C(19)   | 0.20(18)    |
| C(9)-O(1)-C(10)-C(11)   | -174.12(17) |
| C(21)-N(2)-C(11)-C(10)  | 57.5(2)     |
| C(12)-N(2)-C(11)-C(10)  | -111.02(18) |
| C(21)-N(2)-C(11)-C(14)  | 165.87(15)  |
| C(12)-N(2)-C(11)-C(14)  | -2.66(18)   |
| C(19)-C(10)-C(11)-N(2)  | 97.81(19)   |
| O(1)-C(10)-C(11)-N(2)   | -88.1(2)    |
| C(19)-C(10)-C(11)-C(14) | -13.05(19)  |
| O(1)-C(10)-C(11)-C(14)  | 161.08(16)  |
| C(21)-N(2)-C(12)-C(26)  | 52.2(2)     |
| C(11)-N(2)-C(12)-C(26)  | -139.39(15) |
| C(21)-N(2)-C(12)-C(13)  | 174.83(15)  |
| C(11)-N(2)-C(12)-C(13)  | -16.77(19)  |
| N(2)-C(12)-C(13)-C(14)  | 29.92(18)   |
| C(26)-C(12)-C(13)-C(14) | 154.50(16)  |
| C(12)-C(13)-C(14)-C(15) | -144.67(15) |
| C(12)-C(13)-C(14)-C(11) | -31.69(17)  |
| C(12)-C(13)-C(14)-C(18) | 84.10(18)   |
| N(2)-C(11)-C(14)-C(13)  | 21.20(16)   |
| C(10)-C(11)-C(14)-C(13) | 141.19(14)  |



|                         |             |
|-------------------------|-------------|
| N(2)-C(11)-C(14)-C(15)  | 138.86(14)  |
| C(10)-C(11)-C(14)-C(15) | -101.14(15) |
| N(2)-C(11)-C(14)-C(18)  | -99.40(16)  |
| C(10)-C(11)-C(14)-C(18) | 20.59(17)   |
| C(16)-N(1)-C(15)-O(2)   | -174.93(18) |
| C(1)-N(1)-C(15)-O(2)    | 16.1(3)     |
| C(16)-N(1)-C(15)-C(14)  | 10.5(3)     |
| C(1)-N(1)-C(15)-C(14)   | -158.51(17) |
| C(13)-C(14)-C(15)-O(2)  | 47.5(2)     |
| C(11)-C(14)-C(15)-O(2)  | -64.7(2)    |
| C(18)-C(14)-C(15)-O(2)  | 178.50(16)  |
| C(13)-C(14)-C(15)-N(1)  | -137.69(18) |
| C(11)-C(14)-C(15)-N(1)  | 110.21(18)  |
| C(18)-C(14)-C(15)-N(1)  | -6.6(2)     |
| C(15)-N(1)-C(16)-C(17)  | 21.2(2)     |
| C(1)-N(1)-C(16)-C(17)   | -169.47(16) |
| N(1)-C(16)-C(17)-C(18)  | -55.6(2)    |
| C(16)-C(17)-C(18)-C(19) | -55.87(19)  |
| C(16)-C(17)-C(18)-C(14) | 58.2(2)     |
| C(13)-C(14)-C(18)-C(19) | -135.38(15) |
| C(15)-C(14)-C(18)-C(19) | 94.55(17)   |
| C(11)-C(14)-C(18)-C(19) | -21.37(17)  |
| C(13)-C(14)-C(18)-C(17) | 102.61(18)  |
| C(15)-C(14)-C(18)-C(17) | -27.5(2)    |
| C(11)-C(14)-C(18)-C(17) | -143.39(15) |
| O(1)-C(10)-C(19)-C(20)  | 0.93(19)    |
| C(11)-C(10)-C(19)-C(20) | 176.17(15)  |
| O(1)-C(10)-C(19)-C(18)  | -175.79(13) |
| C(11)-C(10)-C(19)-C(18) | -0.6(2)     |
| C(17)-C(18)-C(19)-C(10) | 133.26(16)  |
| C(14)-C(18)-C(19)-C(10) | 13.83(18)   |
| C(17)-C(18)-C(19)-C(20) | -41.5(3)    |
| C(14)-C(18)-C(19)-C(20) | -161.0(2)   |
| O(1)-C(9)-C(20)-C(19)   | 1.89(19)    |
| C(8)-C(9)-C(20)-C(19)   | -174.52(18) |
| C(10)-C(19)-C(20)-C(9)  | -1.71(19)   |

|                        |             |
|------------------------|-------------|
| C(18)-C(19)-C(20)-C(9) | 173.2(2)    |
| C(22)-O(3)-C(21)-O(4)  | 3.6(3)      |
| C(22)-O(3)-C(21)-N(2)  | -176.35(14) |
| C(12)-N(2)-C(21)-O(4)  | -0.1(3)     |
| C(11)-N(2)-C(21)-O(4)  | -167.48(17) |
| C(12)-N(2)-C(21)-O(3)  | 179.86(15)  |
| C(11)-N(2)-C(21)-O(3)  | 12.5(2)     |
| C(21)-O(3)-C(22)-C(25) | -65.1(2)    |
| C(21)-O(3)-C(22)-C(23) | 177.88(16)  |
| C(21)-O(3)-C(22)-C(24) | 58.8(2)     |
| C(27)-O(5)-C(26)-C(12) | 173.08(16)  |
| N(2)-C(12)-C(26)-O(5)  | 59.4(2)     |
| C(13)-C(12)-C(26)-O(5) | -58.3(2)    |
| C(28)-O(7)-C(27)-O(6)  | 1.1(3)      |
| C(28)-O(7)-C(27)-O(5)  | -179.47(15) |
| C(26)-O(5)-C(27)-O(6)  | 0.6(3)      |
| C(26)-O(5)-C(27)-O(7)  | -178.88(16) |
| C(27)-O(7)-C(28)-C(29) | 63.9(2)     |
| C(27)-O(7)-C(28)-C(30) | -60.2(2)    |
| C(27)-O(7)-C(28)-C(31) | -178.69(19) |

---

Symmetry transformations used to generate equivalent atoms:

■ **DFT Calculations:** Geometry optimizations and frequency calculations performed with tight geometry and SCF convergence criteria at M052x/6-31G(d) level of theory in Gaussian 09, Revision A.02 with ultrafine grids<sup>16,17</sup>. Single point energies of optimized structures calculated at M052x/6-311+G(2df,2p) level of theory. Initial conformer distributions for each molecule generated with Spartan '04 through the use of molecular mechanics<sup>18</sup>.

### Macrocyclic Alkene E-12

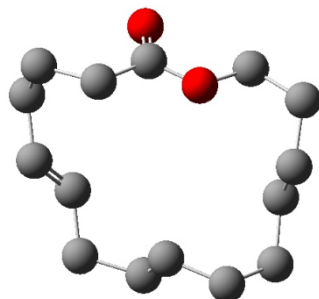

### Coordinates (Angstroms):

| Atom | X         | Y         | Z         |
|------|-----------|-----------|-----------|
| C    | -2.041708 | -2.783364 | -0.087092 |
| H    | -3.248809 | -0.775619 | -1.561592 |
| C    | 1.434450  | -1.736250 | 0.064960  |
| C    | 2.148387  | -1.009921 | 1.179184  |
| O    | 0.143779  | -1.950036 | 0.375029  |
| H    | 1.498873  | -0.203079 | 1.523890  |
| H    | 2.240462  | -1.714800 | 2.010906  |
| H    | 1.208385  | 1.431329  | -1.641266 |
| H    | -3.660516 | -1.650248 | 0.762826  |
| C    | -3.391231 | 0.902272  | -0.216310 |
| C    | -2.709037 | -0.384102 | -0.692519 |

(16) Frisch, M. J.; Trucks, G. W.; Schlegel, H. B.; Scuseria, G. E.; Robb, M. A.; Cheeseman, J. R.; Scalmani, G.; Barone, V.; Mennucci, B.; Petersson, G. A.; Nakatsuji, H.; Caricato, M.; Li, X.; Hratchian, H. P.; Izmaylov, A. F.; Bloino, J.; Zheng, G.; Sonnenberg, J. L.; Hada, M.; Ehara, M.; Toyota, K.; Fukuda, R.; Hasegawa, J.; Ishida, M.; Nakajima, T.; Honda, Y.; Kitao, O.; Nakai, H.; Vreven, T.; Montgomery, Jr., J. A.; Peralta, J. E.; Ogliaro, F.; Bearpark, M.; Heyd, J. J.; Brothers, E.; Kudin, K. N.; Staroverov, V. N.; Kobayashi, R.; Normand, J.; Raghavachari, K.; Rendell, A.; Burant, J. C.; Iyengar, S. S.; Tomasi, J.; Cossi, M.; Rega, N.; Millam, J. M.; Klene, M.; Knox, J. E.; Cross, J. B.; Bakken, V.; Adamo, C.; Jaramillo, J.; Gomperts, R.; Stratmann, R. E.; Yazyev, O.; Austin, A. J.; Cammi, R.; Pomelli, C.; Ochterski, J. W.; Martin, R. L.; Morokuma, K.; Zakrzewski, V. G.; Voth, G. A.; Salvador, P.; Dannenberg, J. J.; Dapprich, S. A.; Daniels, D.; Farkas, O.; Foresman, J. B.; Ortiz, J. V.; Cioslowski, J.; Fox, D. J. *Gaussian 09, Revision A 02*, Gaussian, Inc., Wallingford CT, 2009.

(17) Zhao, Y.; Schultz, N. E.; Truhlar, D. G. *J. Chem. Theory and Comput.* **2006**, *2*, 364–382.

(18) Spartan '04, <http://www.wavefun.com>

|   |           |           |           |
|---|-----------|-----------|-----------|
| H | -0.597620 | -2.055377 | -1.547839 |
| O | 1.932877  | -2.107775 | -0.970975 |
| C | -2.708591 | 1.565021  | 0.988175  |
| C | -1.215738 | 1.848534  | 0.791596  |
| H | -0.819865 | 2.307681  | 1.704072  |
| C | -0.931146 | 2.778849  | -0.386836 |
| H | -0.667540 | 0.910136  | 0.660548  |
| H | -1.551169 | 3.676664  | -0.293859 |
| H | -1.222488 | 2.295173  | -1.324932 |
| C | 0.543368  | 3.192393  | -0.482163 |
| H | 0.852087  | 3.681876  | 0.446582  |
| H | 0.648060  | 3.932301  | -1.283158 |
| H | -3.222577 | 2.507572  | 1.203062  |
| H | -3.433730 | 1.611981  | -1.047144 |
| H | -2.840065 | 0.936904  | 1.873297  |
| H | -4.429301 | 0.678006  | 0.049405  |
| C | 1.454795  | 2.032342  | -0.765832 |
| C | 3.443095  | 0.556016  | -0.372037 |
| H | 2.779064  | 2.299576  | 0.827731  |
| C | 3.516455  | -0.482467 | 0.758937  |
| H | 4.454949  | 0.930559  | -0.557440 |
| H | 3.106587  | 0.065316  | -1.285897 |
| H | 3.994477  | -0.037026 | 1.635692  |
| H | 4.141210  | -1.316014 | 0.433310  |
| C | 2.531412  | 1.705897  | -0.051743 |
| H | -1.697308 | -0.148927 | -1.036795 |
| H | -2.061720 | -1.100633 | 1.236835  |
| C | -2.648621 | -1.461217 | 0.390247  |
| H | -2.656599 | -3.217136 | -0.881823 |
| H | -2.032357 | -3.497622 | 0.739771  |
| C | -0.630266 | -2.637565 | -0.627031 |
| H | -0.169471 | -3.604730 | -0.827829 |

|  | Item                 | Value    | Threshold | Converged? |
|--|----------------------|----------|-----------|------------|
|  | Maximum Force        | 0.000001 | 0.000015  | YES        |
|  | RMS Force            | 0.000000 | 0.000010  | YES        |
|  | Maximum Displacement | 0.000027 | 0.000060  | YES        |

RMS Displacement 0.000003 0.000040 YES

Predicted change in Energy=-7.515763D-12

Optimization completed.

-- Stationary point found.

### Thermochemistry:

Zero-point correction= 0.399952 (Hartree/Particle)

Thermal correction to Energy= 0.417444

Thermal correction to Enthalpy= 0.418388

Thermal correction to Gibbs Free Energy= 0.354845

Sum of electronic and zero-point Energies= -737.213951

Sum of electronic and thermal Energies= -737.196459

Sum of electronic and thermal Enthalpies= -737.195515

Sum of electronic and thermal Free Energies= -737.259058

### Single Point Energy:

SCF Done: E(RM052X) = -737.868832888 A.U. after 13 cycles

Conv = 0.6081D-08 -V/T = 2.0045

### Macrocyclic Alkene Z-12

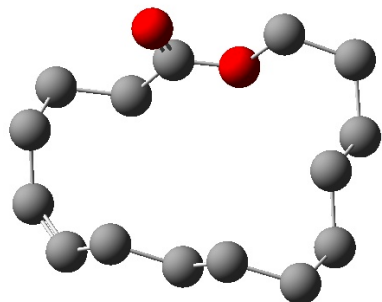

### Coordinates (Angstroms):

| Atom | X         | Y         | Z         |
|------|-----------|-----------|-----------|
| C    | -2.629232 | -2.507236 | -0.082233 |
| H    | -1.699973 | 0.043343  | 0.500822  |
| C    | 0.939670  | -1.900343 | 0.190667  |
| C    | 1.914422  | -1.506325 | -0.893789 |
| O    | -0.277416 | -2.156199 | -0.321825 |
| H    | 1.905452  | -2.307040 | -1.637488 |
| H    | 1.521176  | -0.616297 | -1.394541 |
| C    | 2.373332  | 2.231374  | -0.476291 |

|   |           |           |           |
|---|-----------|-----------|-----------|
| H | -2.215442 | -1.087816 | -1.640503 |
| C | -2.947137 | 1.356408  | -0.649227 |
| C | -2.717905 | 0.047423  | 0.104727  |
| H | -1.052814 | -3.543200 | 1.000582  |
| O | 1.193367  | -1.992989 | 1.368328  |
| C | -2.649440 | 2.607266  | 0.186044  |
| C | -1.254438 | 2.622265  | 0.823993  |
| H | -1.102534 | 3.586646  | 1.319103  |
| C | -0.114420 | 2.390050  | -0.167198 |
| H | -1.198641 | 1.866503  | 1.613593  |
| H | -0.145556 | 3.156062  | -0.950474 |
| H | -0.238104 | 1.426719  | -0.671480 |
| C | 1.258851  | 2.402395  | 0.516339  |
| H | 1.286430  | 1.620319  | 1.277768  |
| H | 1.383977  | 3.357547  | 1.039320  |
| H | -2.760816 | 3.489854  | -0.451463 |
| H | -2.319996 | 1.358344  | -1.546374 |
| H | -3.398531 | 2.698579  | 0.978689  |
| H | -3.982329 | 1.397712  | -1.001896 |
| H | 2.418005  | 2.999595  | -1.245245 |
| C | 3.436224  | 0.081412  | 0.399855  |
| C | 3.282993  | 1.255696  | -0.526166 |
| C | 3.318184  | -1.253595 | -0.352833 |
| H | 2.706377  | 0.100111  | 1.208086  |
| H | 4.426392  | 0.126634  | 0.864559  |
| H | 3.595008  | -2.070577 | 0.315293  |
| H | 4.023016  | -1.257990 | -1.188788 |
| H | 4.010014  | 1.291009  | -1.335298 |
| H | -3.391290 | -0.009351 | 0.968358  |
| H | -3.912834 | -1.188544 | -1.200943 |
| C | -2.898376 | -1.175934 | -0.791708 |
| H | -2.676937 | -3.322393 | -0.808067 |
| H | -3.401958 | -2.698792 | 0.668668  |
| C | -1.288123 | -2.544877 | 0.629673  |
| H | -1.253304 | -1.859344 | 1.474594  |

| Item | Value | Threshold | Converged? |
|------|-------|-----------|------------|
|------|-------|-----------|------------|

|                      |          |          |     |
|----------------------|----------|----------|-----|
| Maximum Force        | 0.000001 | 0.000015 | YES |
| RMS Force            | 0.000000 | 0.000010 | YES |
| Maximum Displacement | 0.000031 | 0.000060 | YES |
| RMS Displacement     | 0.000008 | 0.000040 | YES |

Predicted change in Energy=-8.905519D-12

Optimization completed.

-- Stationary point found.

### Thermochemistry:

|                                              |                             |
|----------------------------------------------|-----------------------------|
| Zero-point correction=                       | 0.399866 (Hartree/Particle) |
| Thermal correction to Energy=                | 0.417554                    |
| Thermal correction to Enthalpy=              | 0.418498                    |
| Thermal correction to Gibbs Free Energy=     | 0.353786                    |
| Sum of electronic and zero-point Energies=   | -737.210337                 |
| Sum of electronic and thermal Energies=      | -737.192648                 |
| Sum of electronic and thermal Enthalpies=    | -737.191704                 |
| Sum of electronic and thermal Free Energies= | -737.256416                 |

### Single Point Energy:

SCF Done: E(RM052X) = -737.865815613 A.U. after 14 cycles  
 Convrg = 0.1023D-08 -V/T = 2.0045

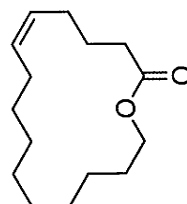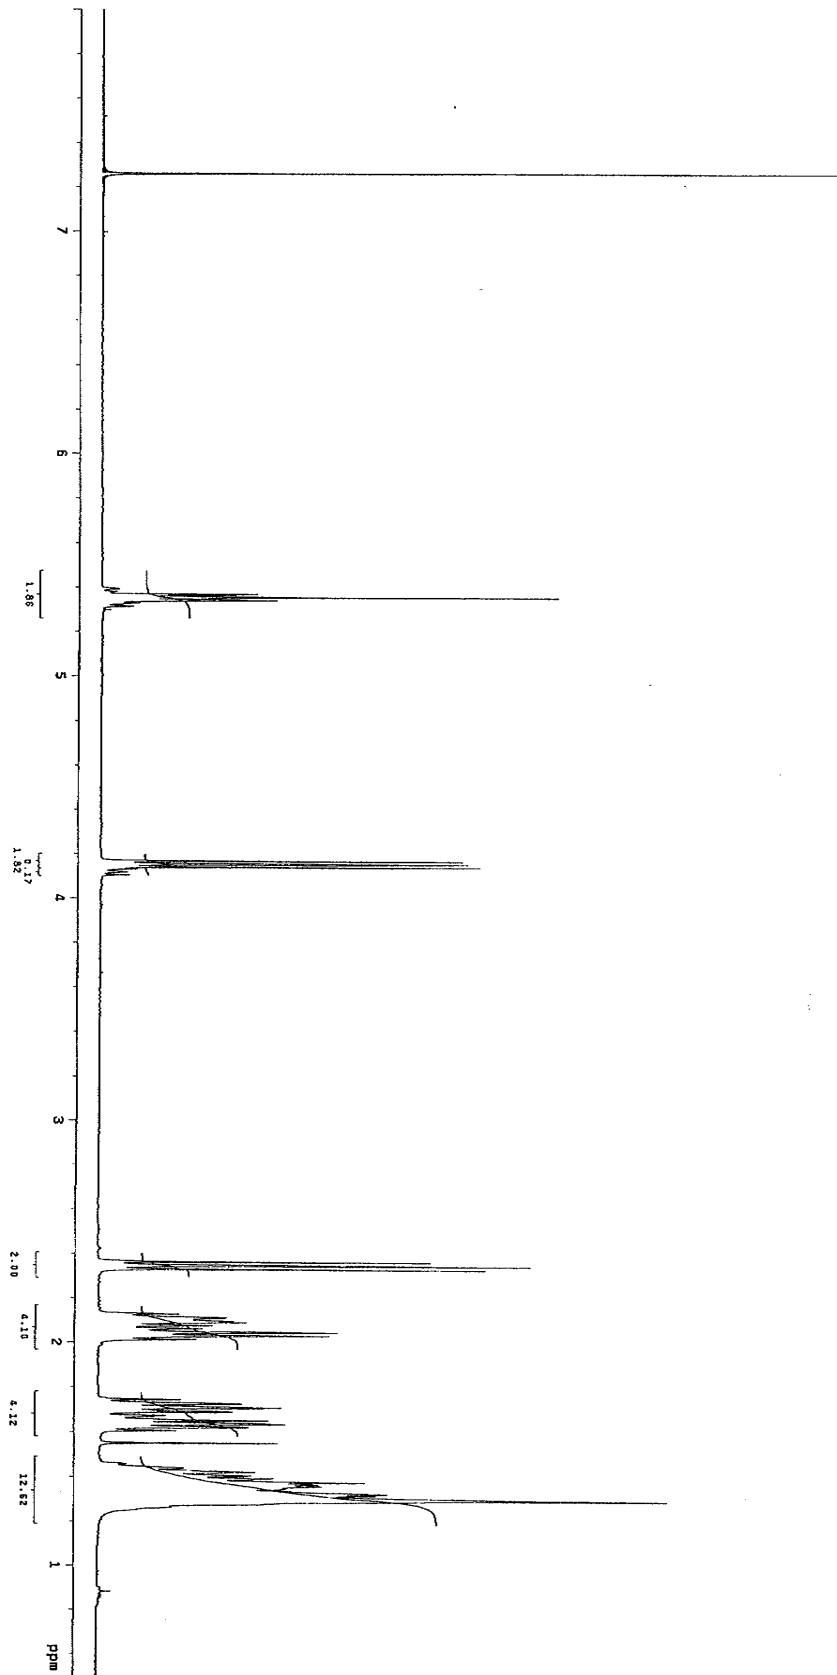

MS-111-160-F  
Sample: MS-111-160-F  
File: YMR/MS-111-160-F/Proton\_01.f1d  
Pulse Sequence: sspul



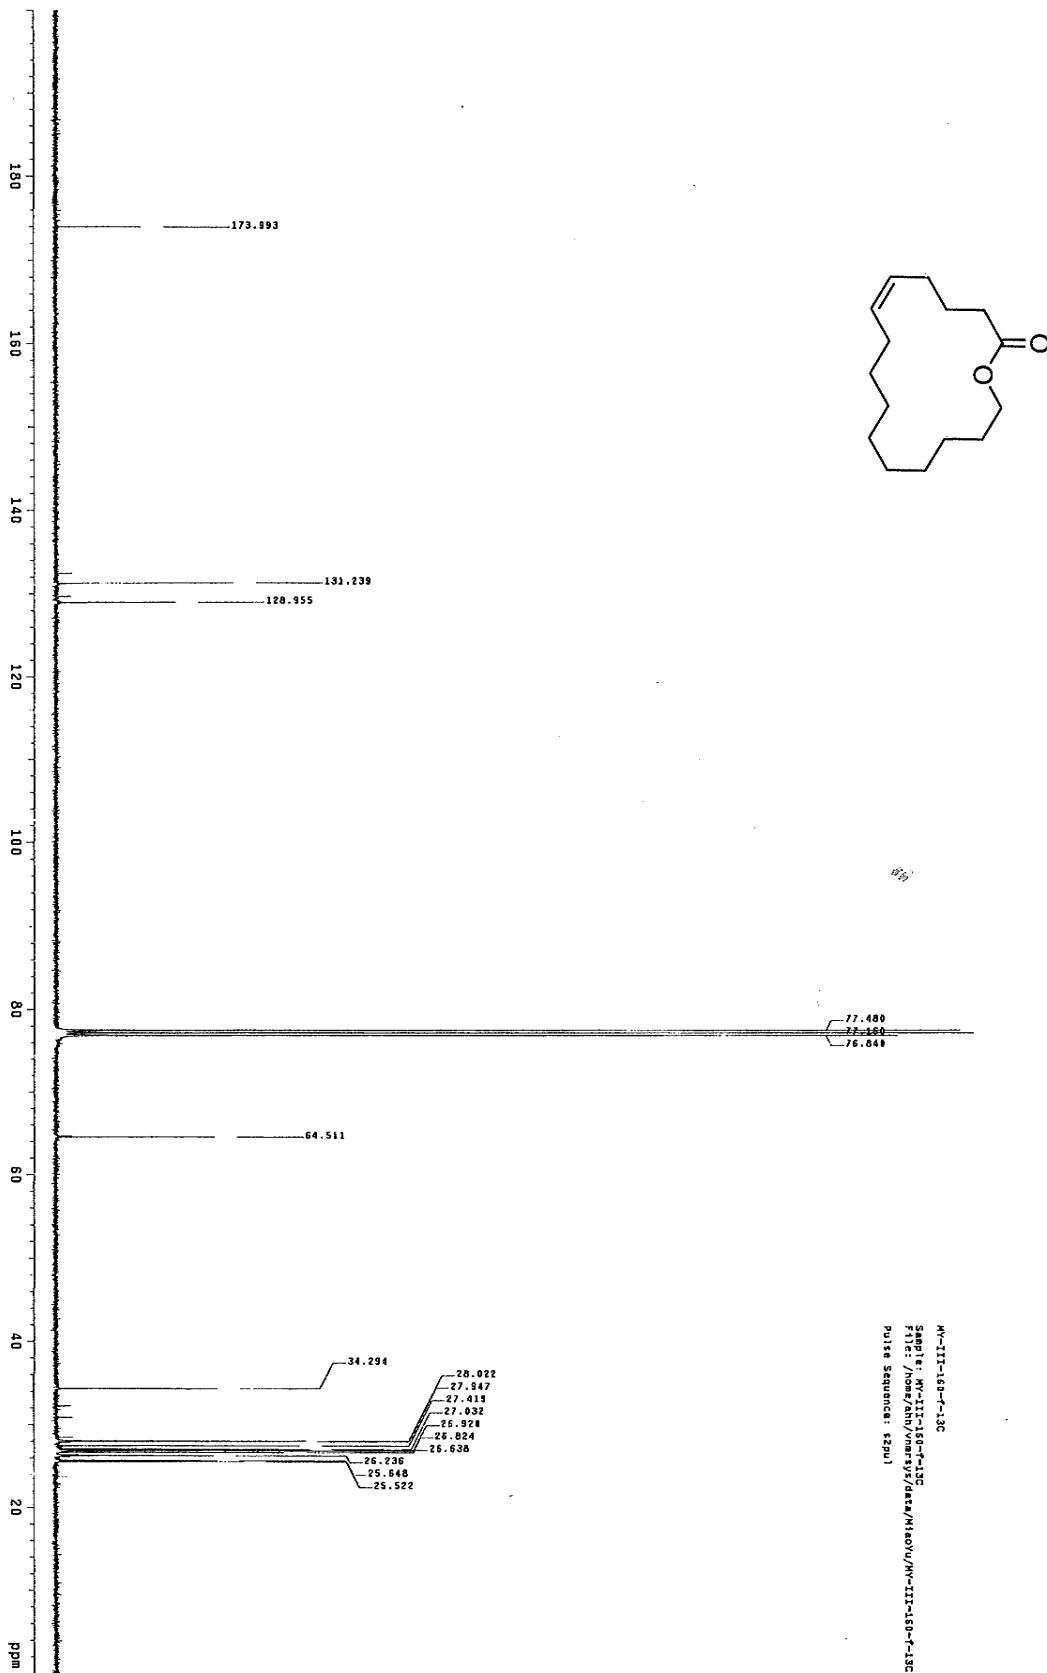

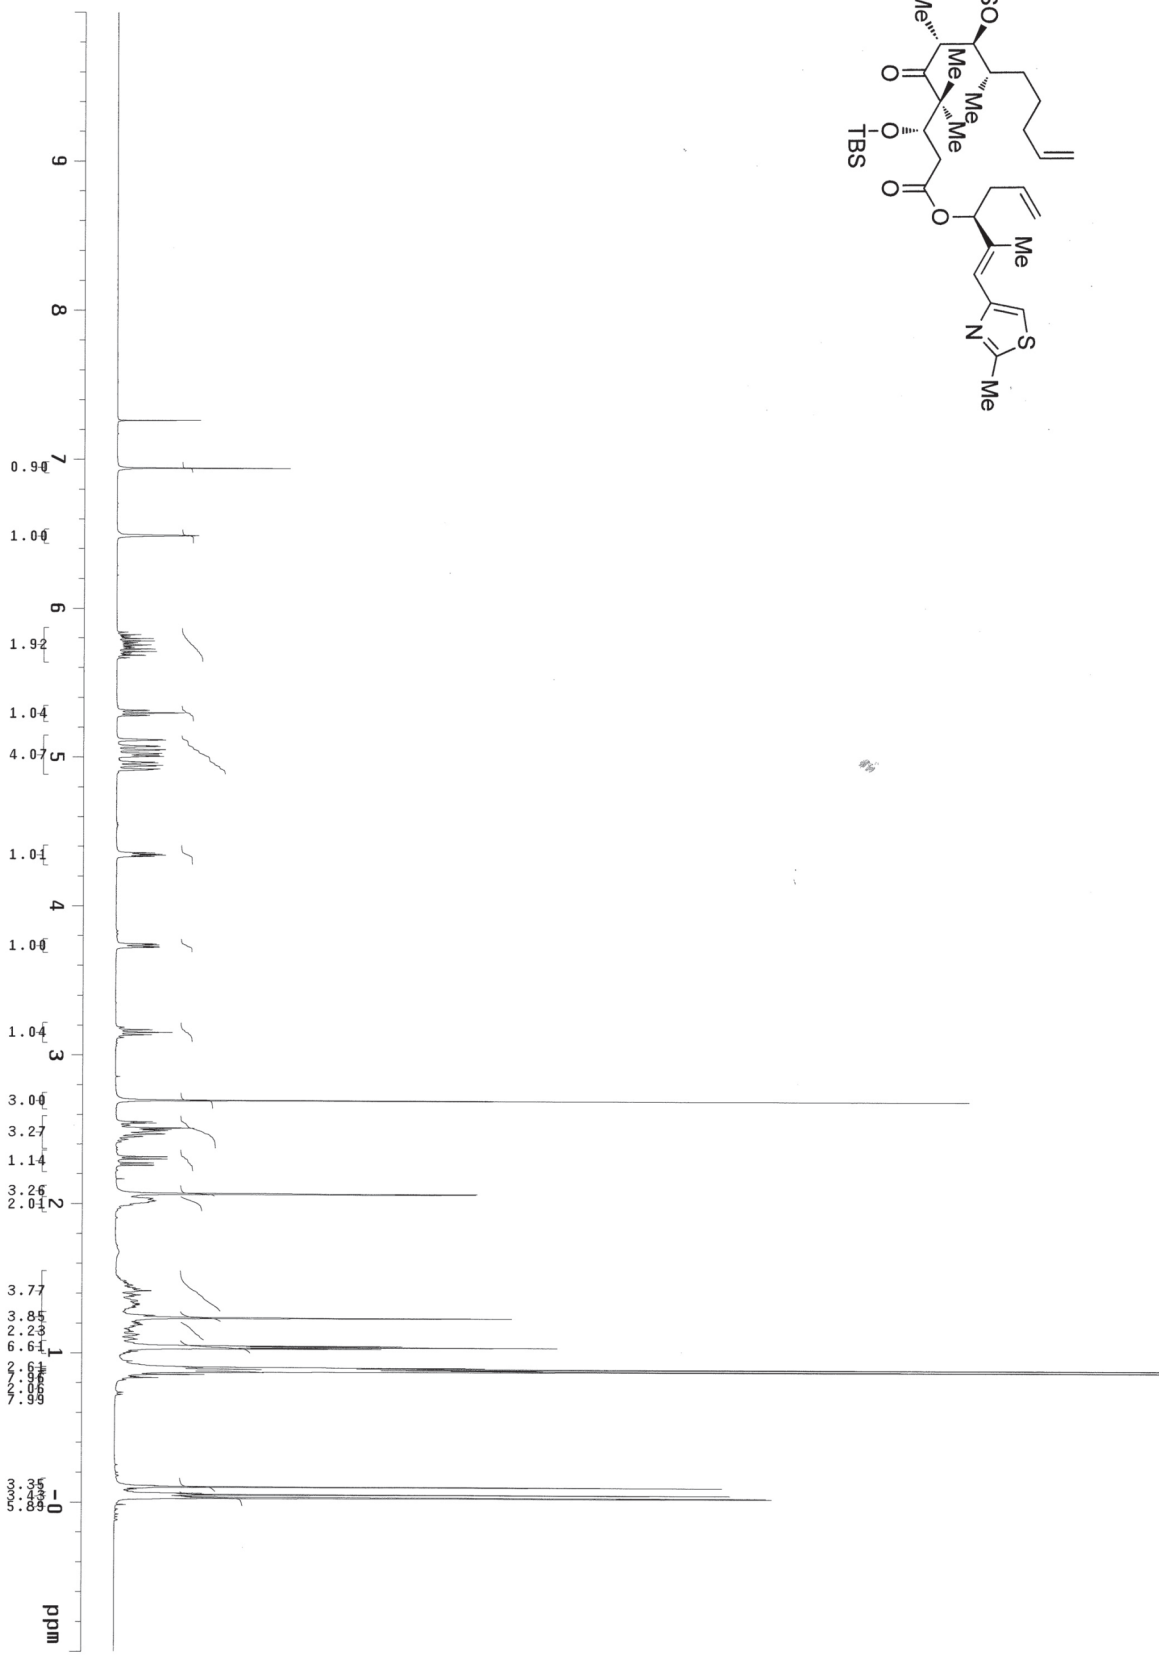

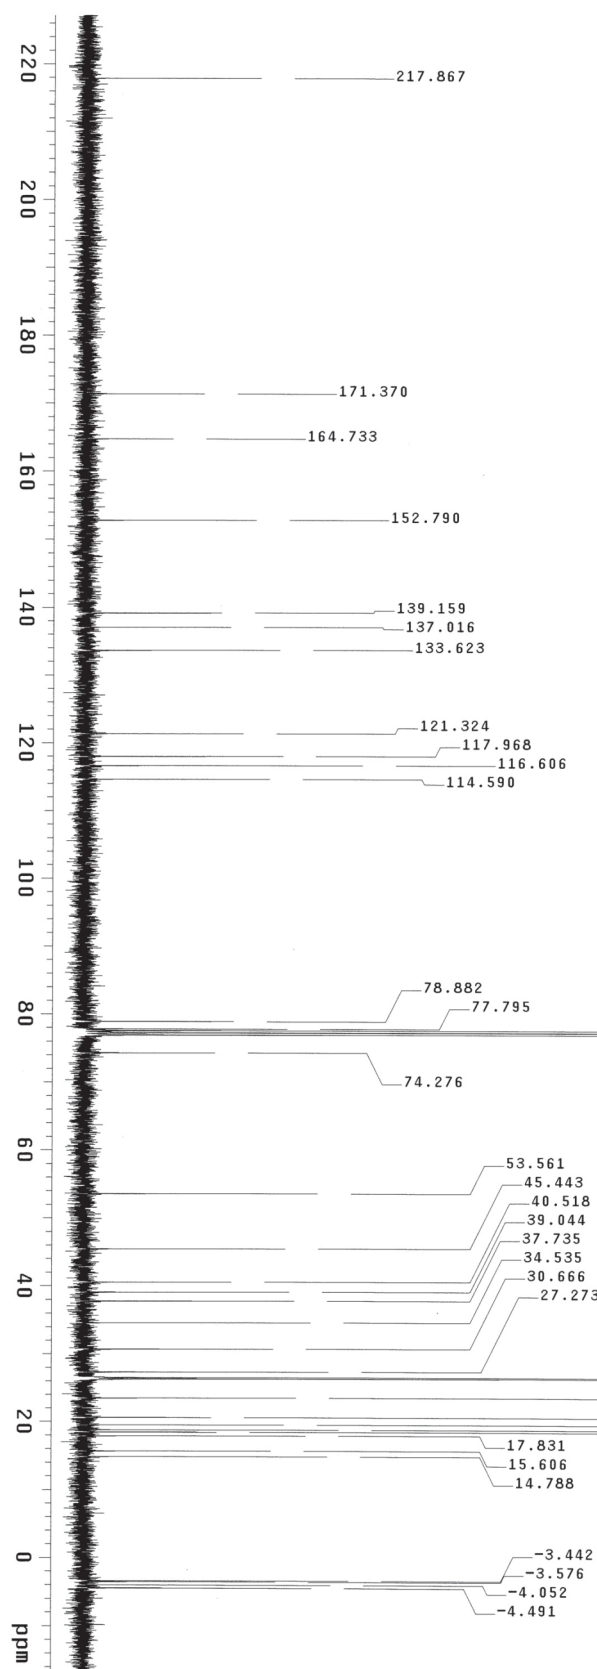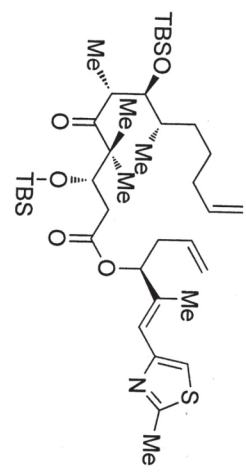



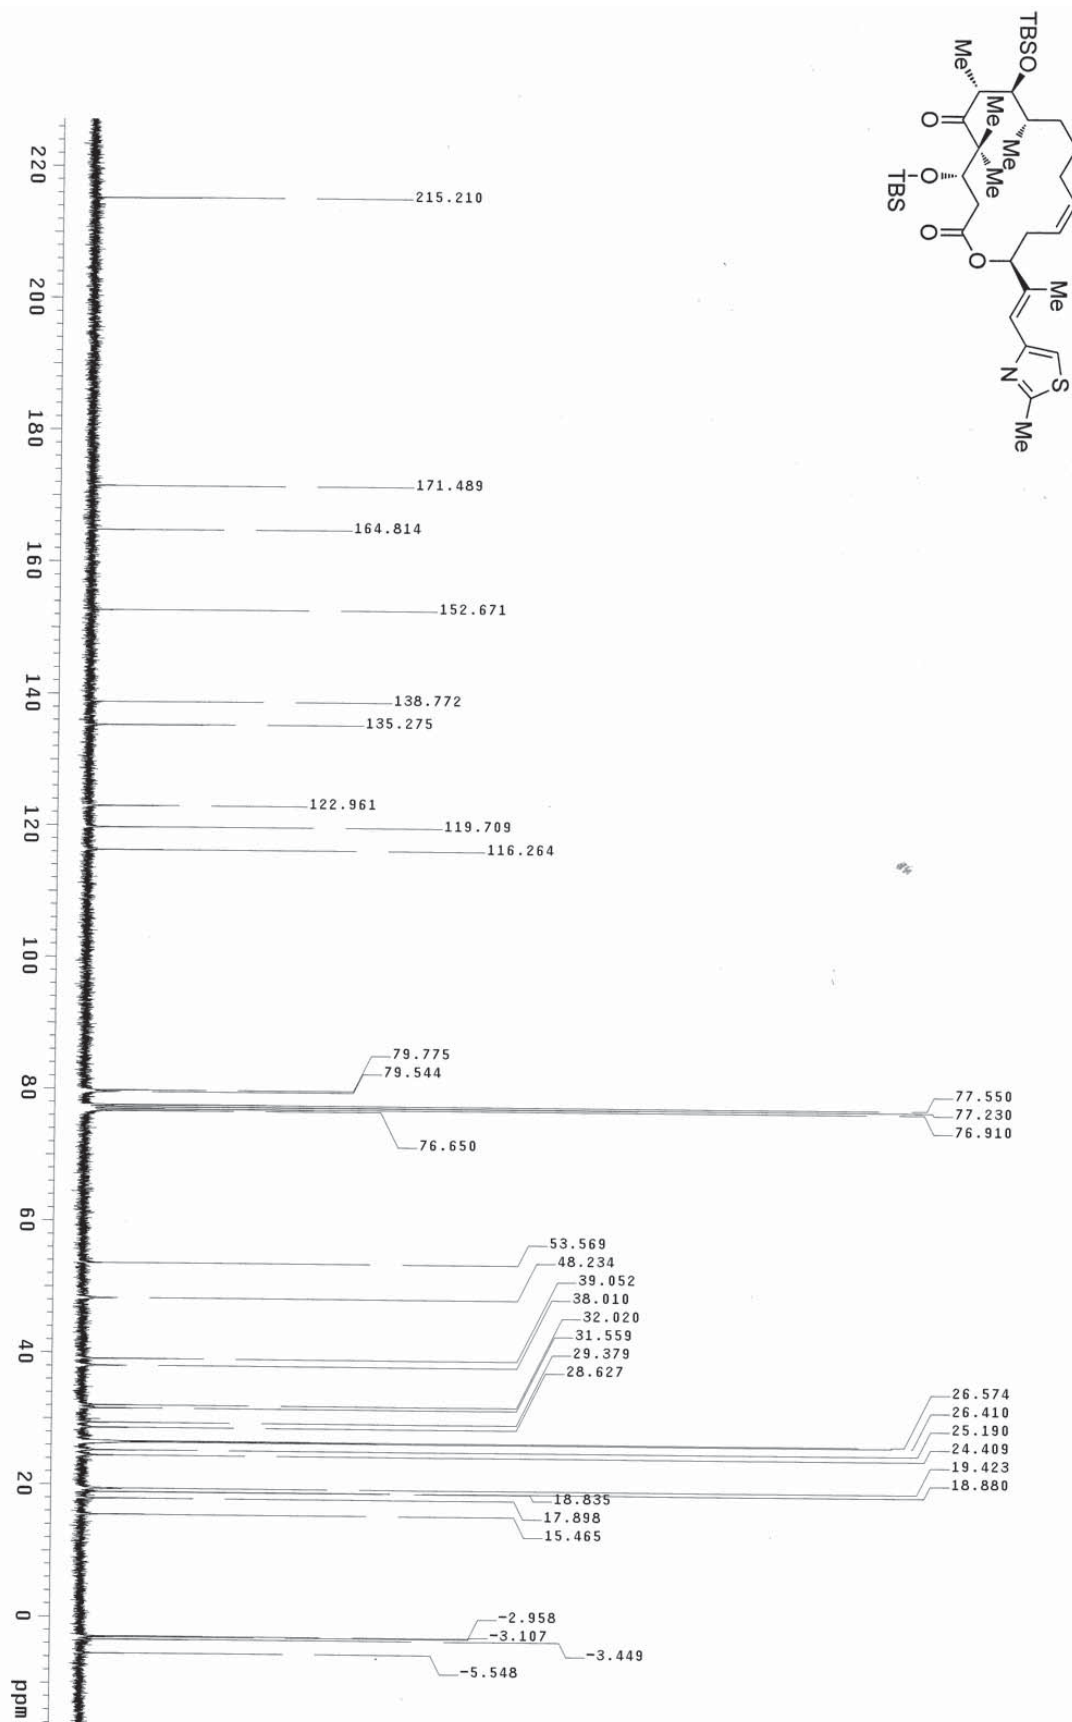

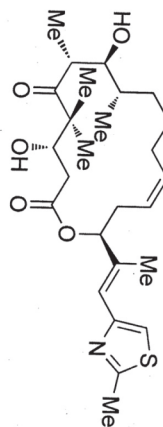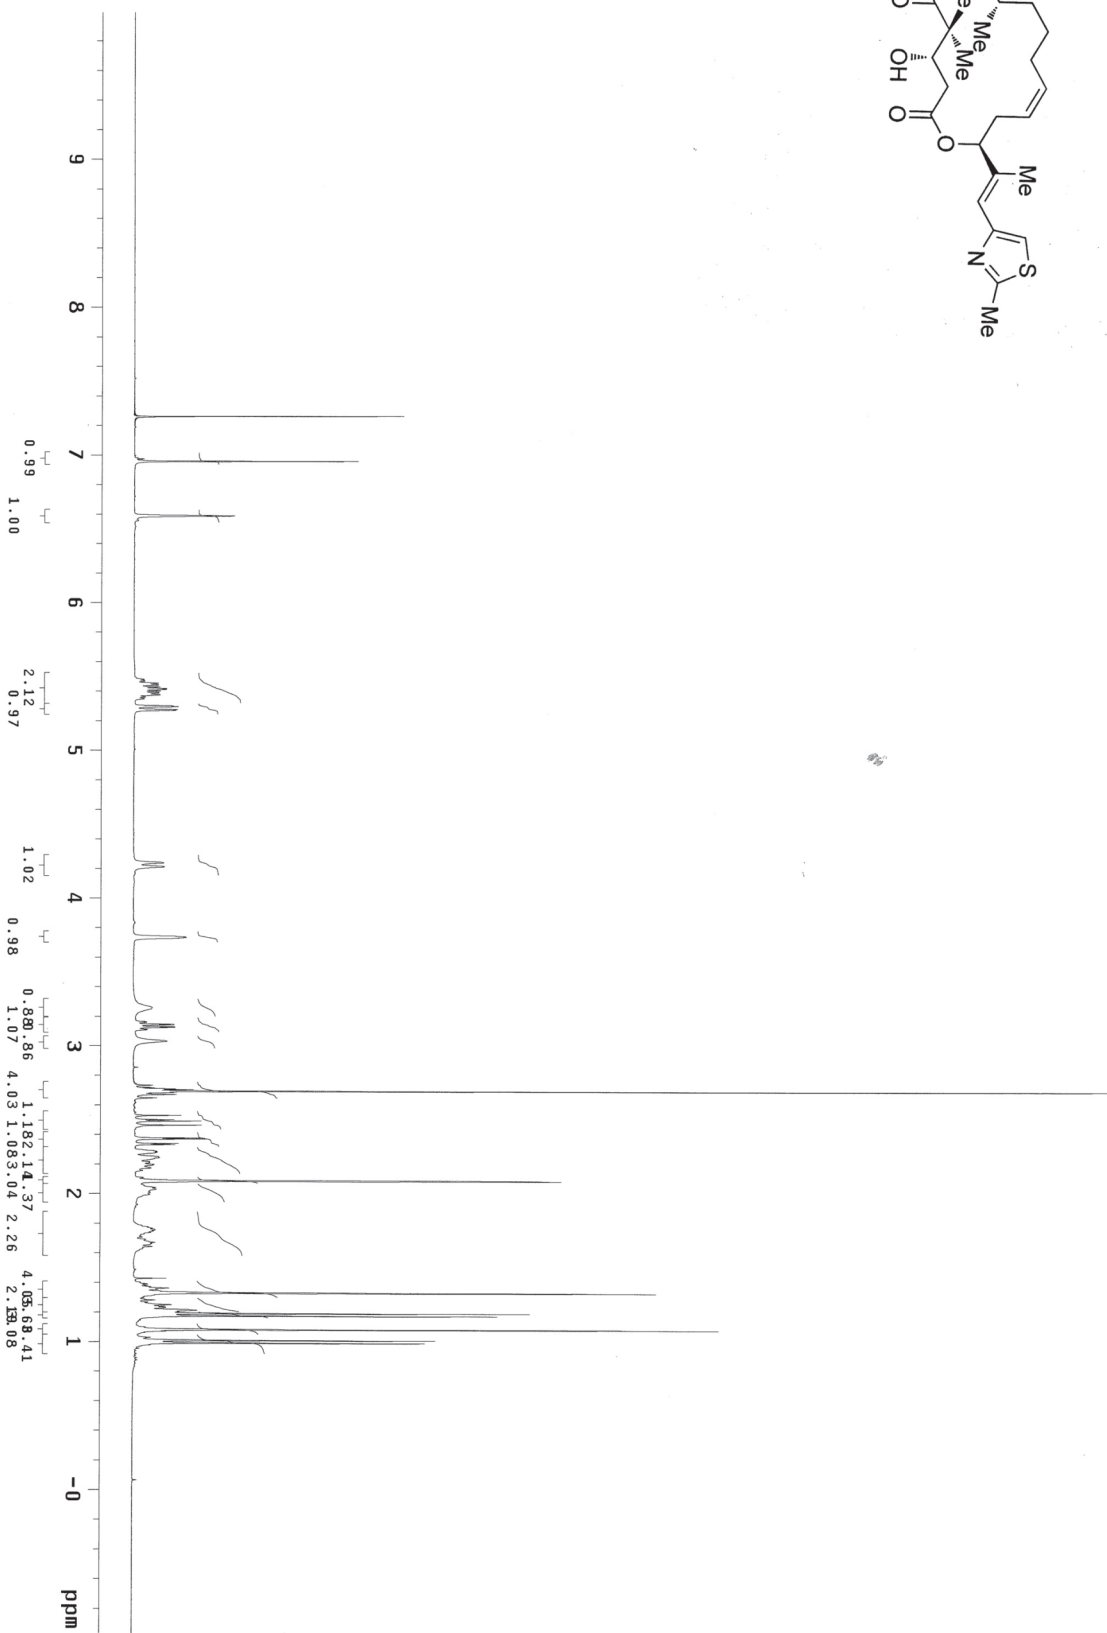

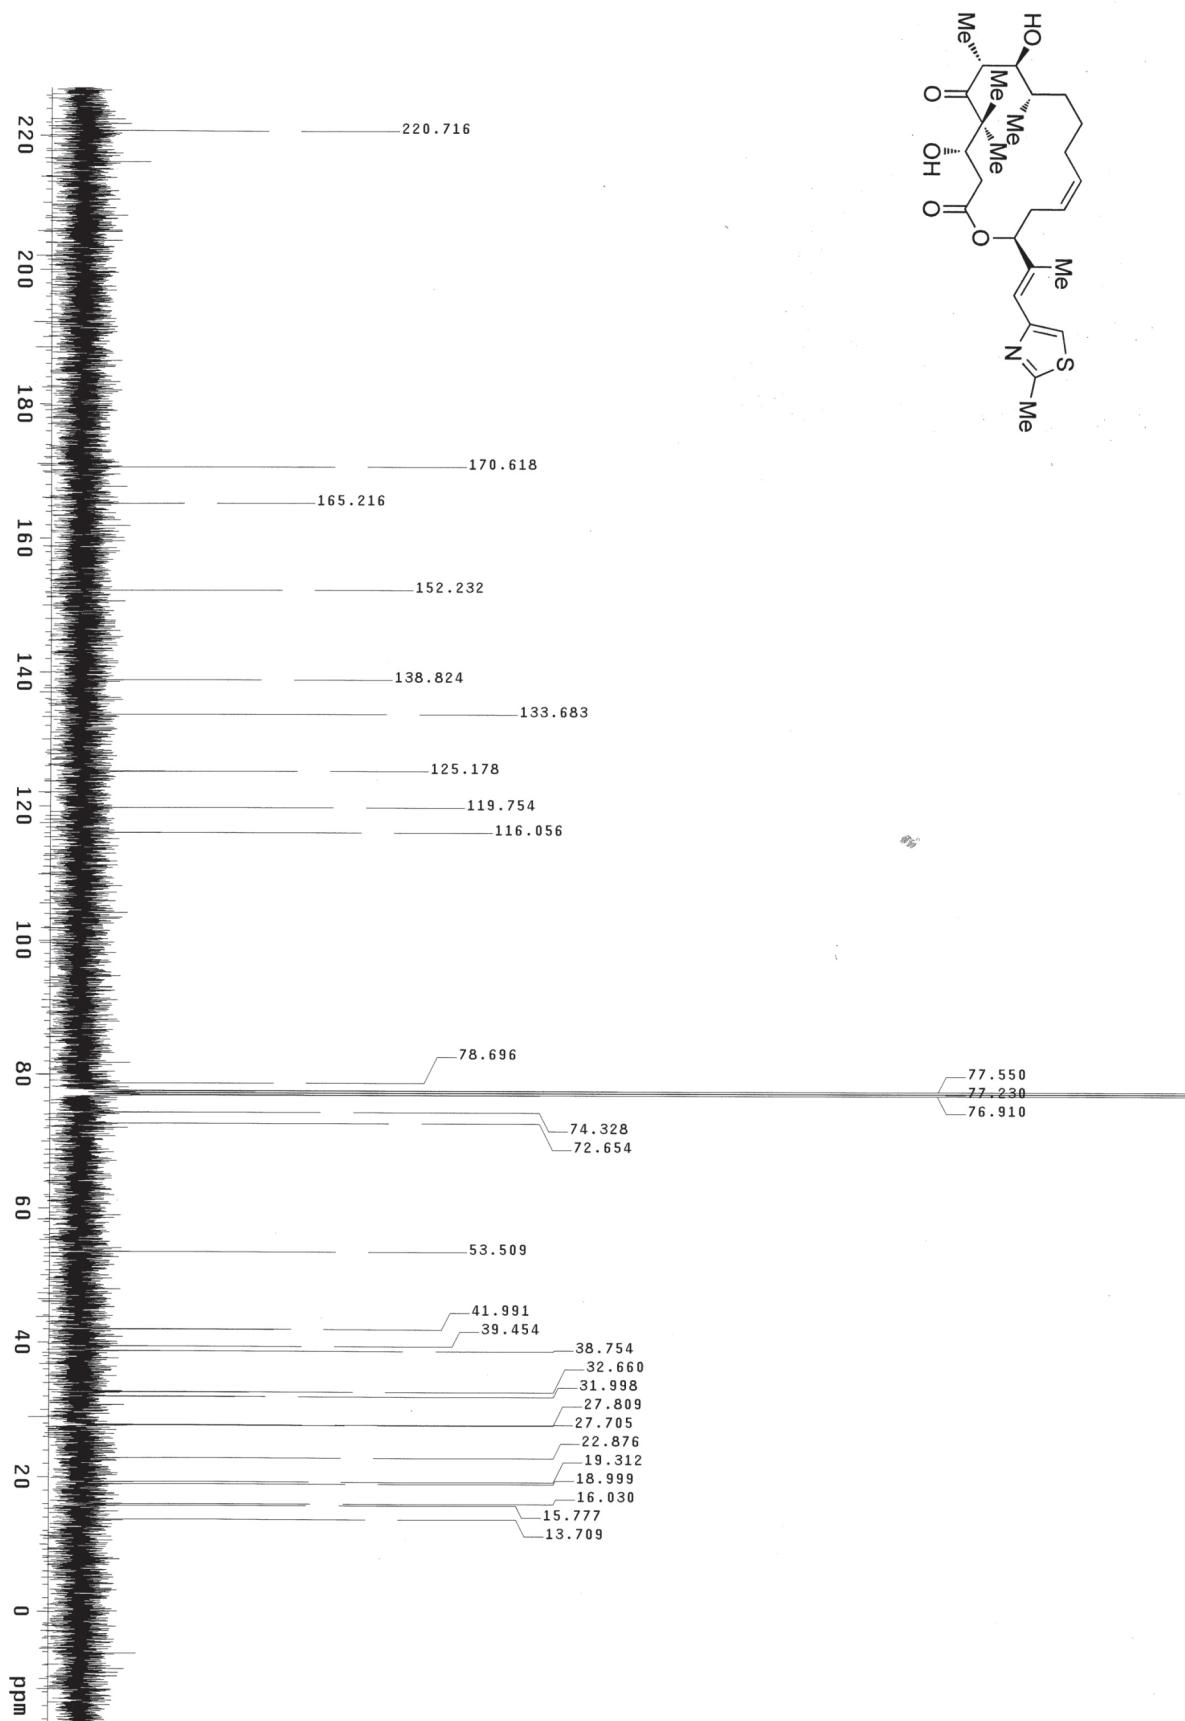

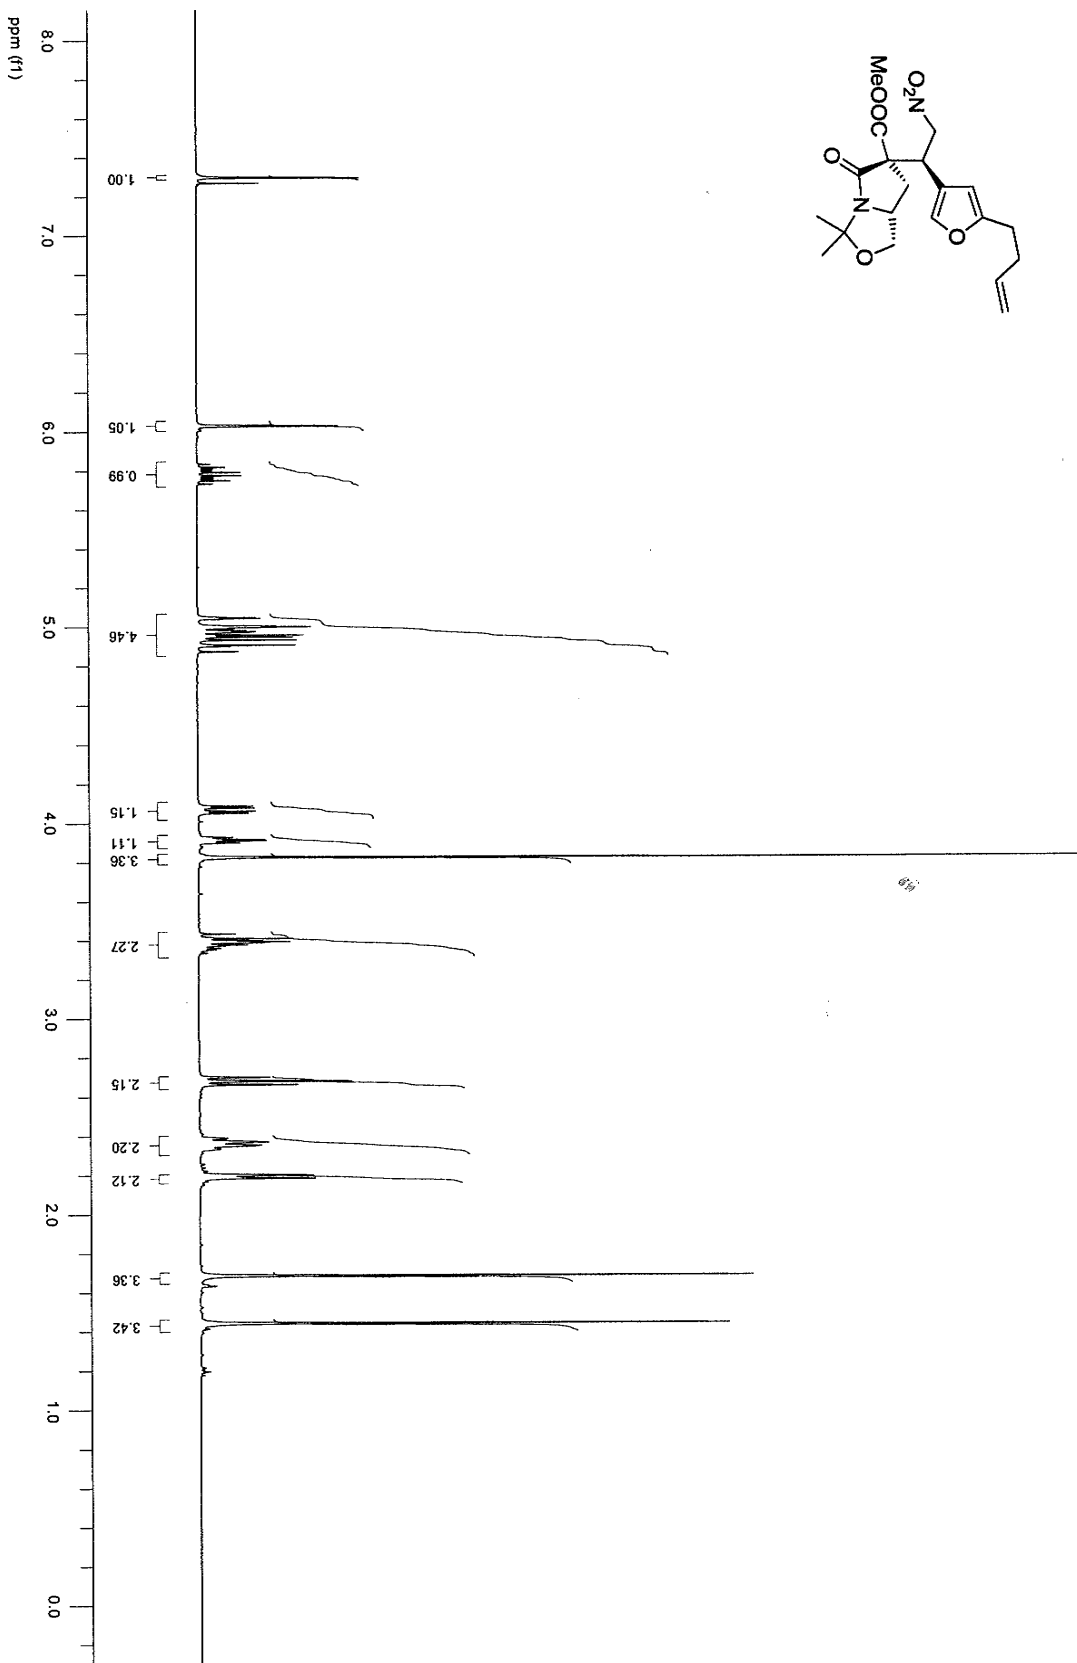



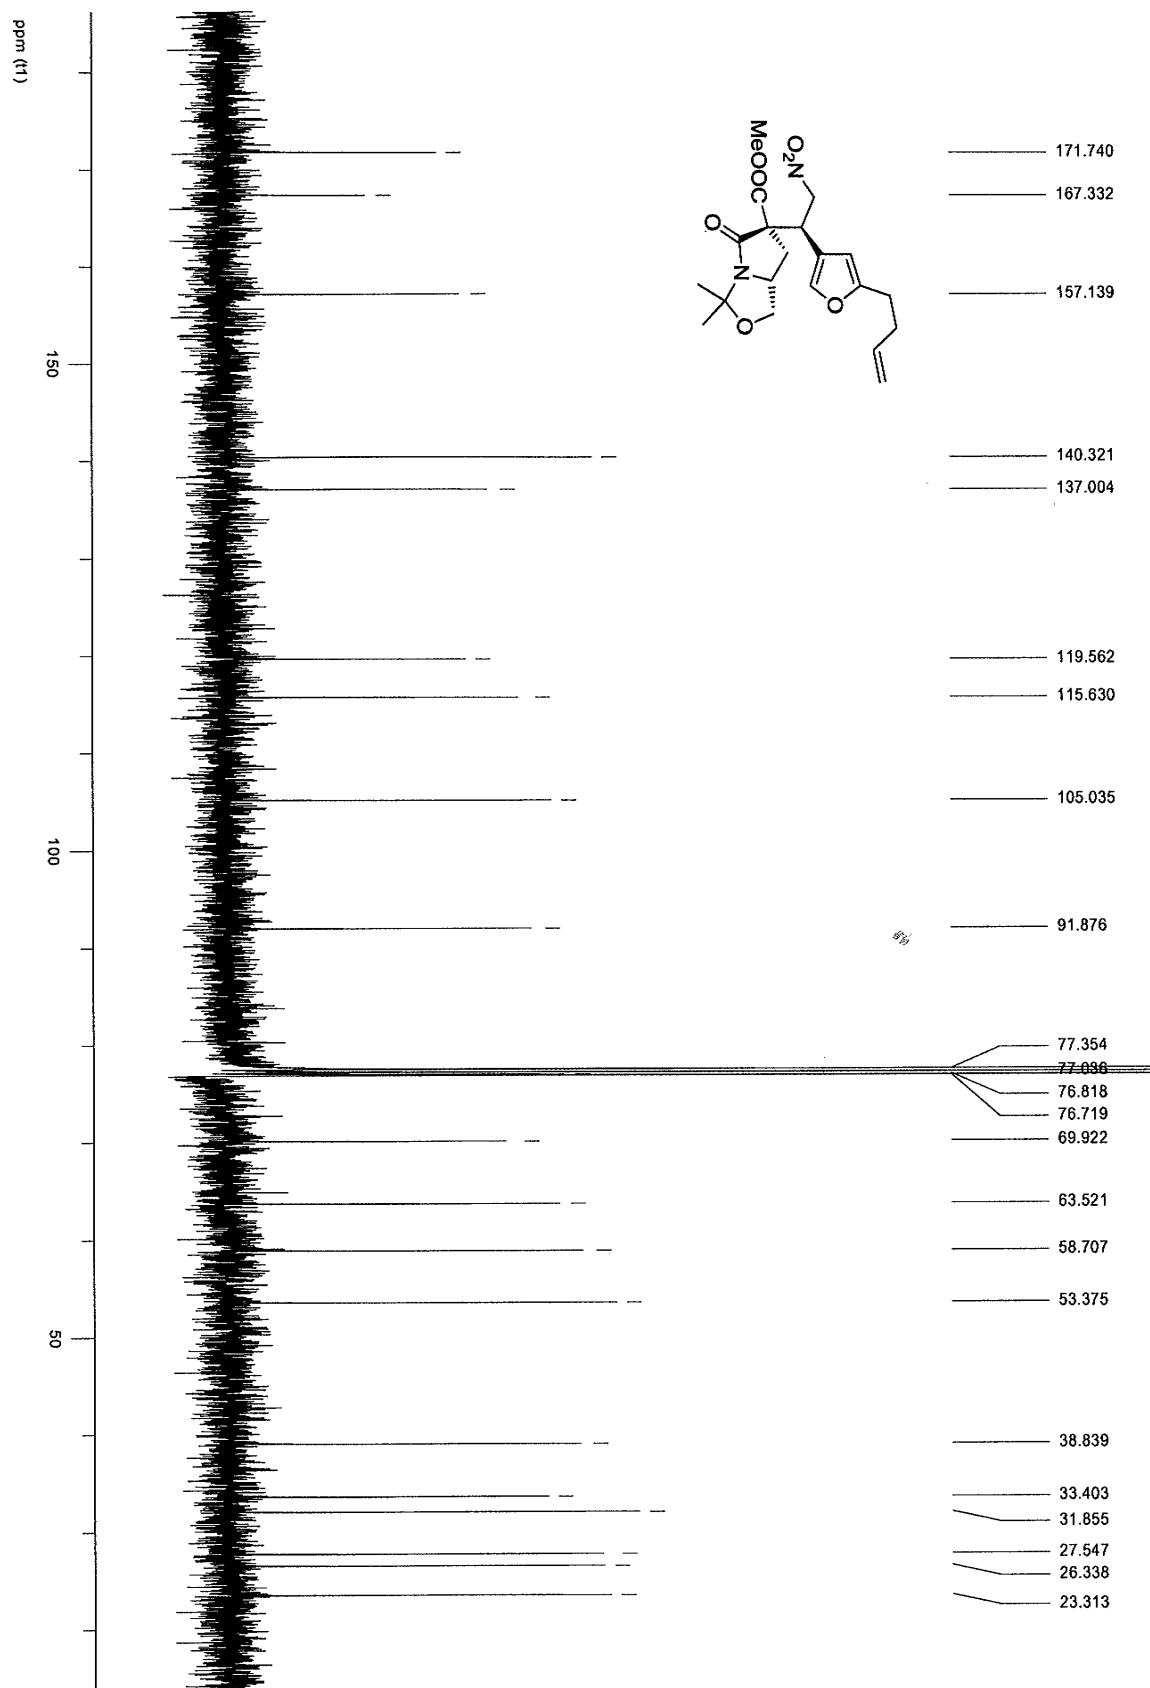

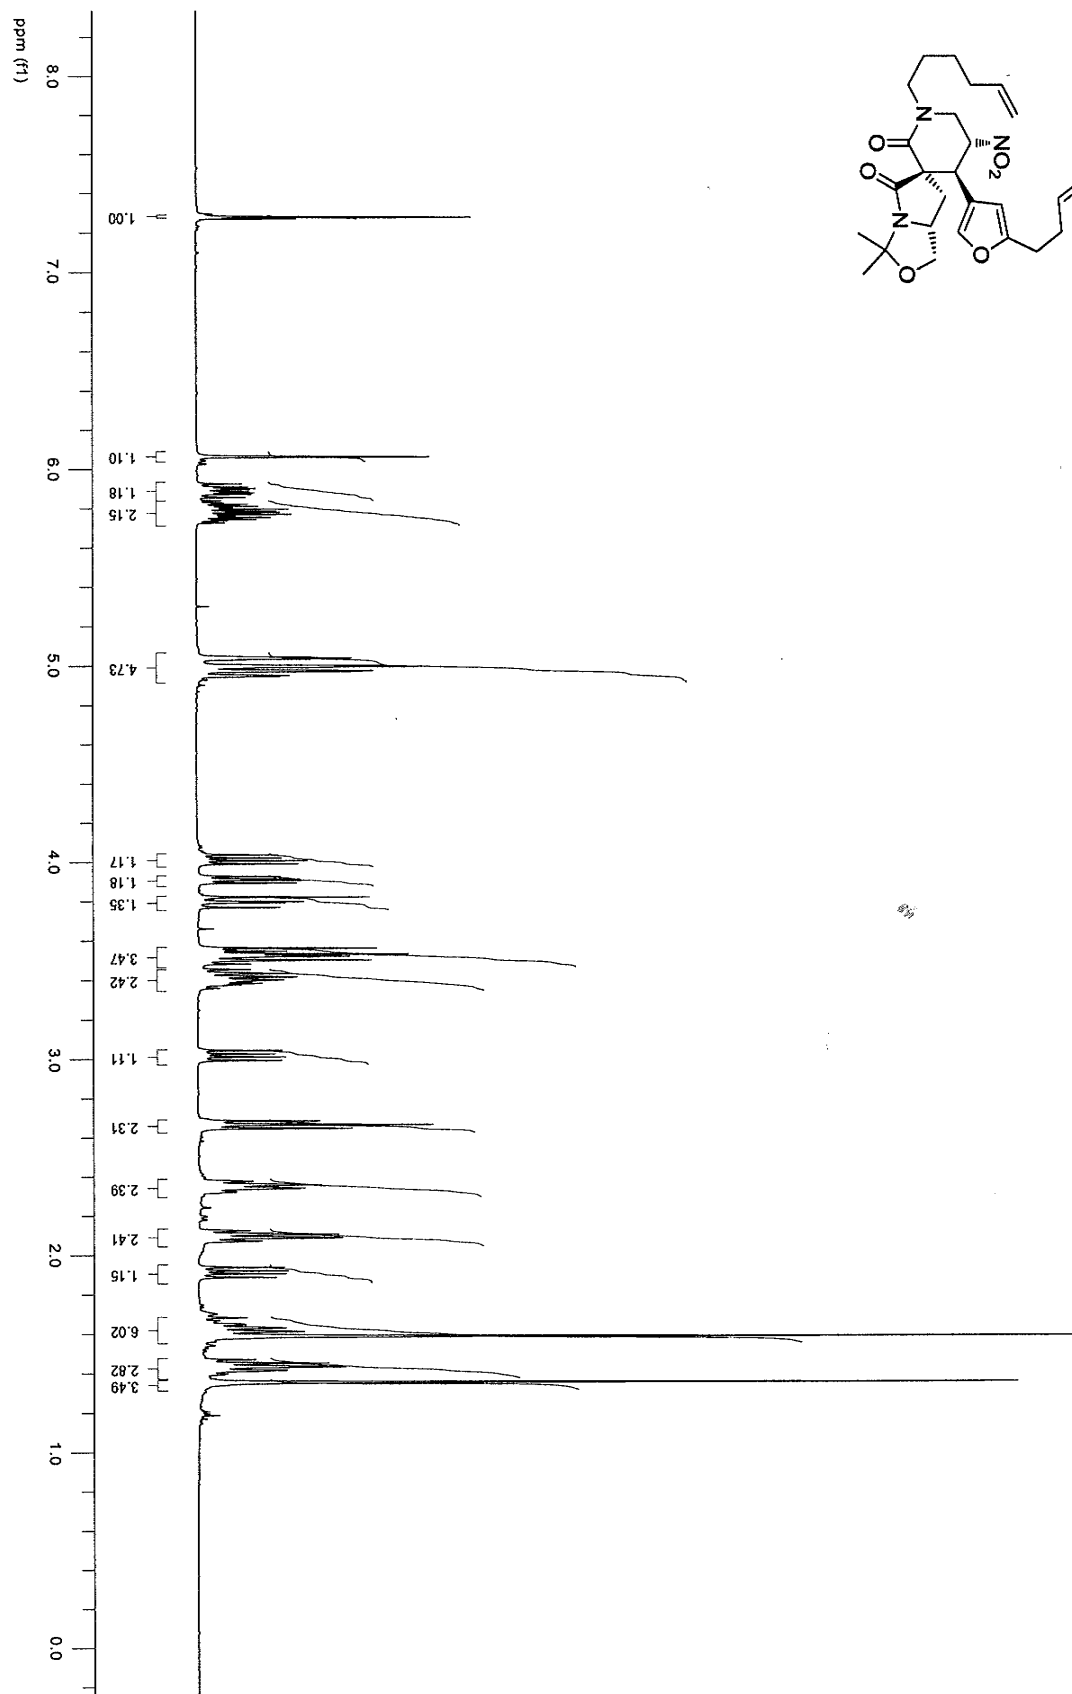

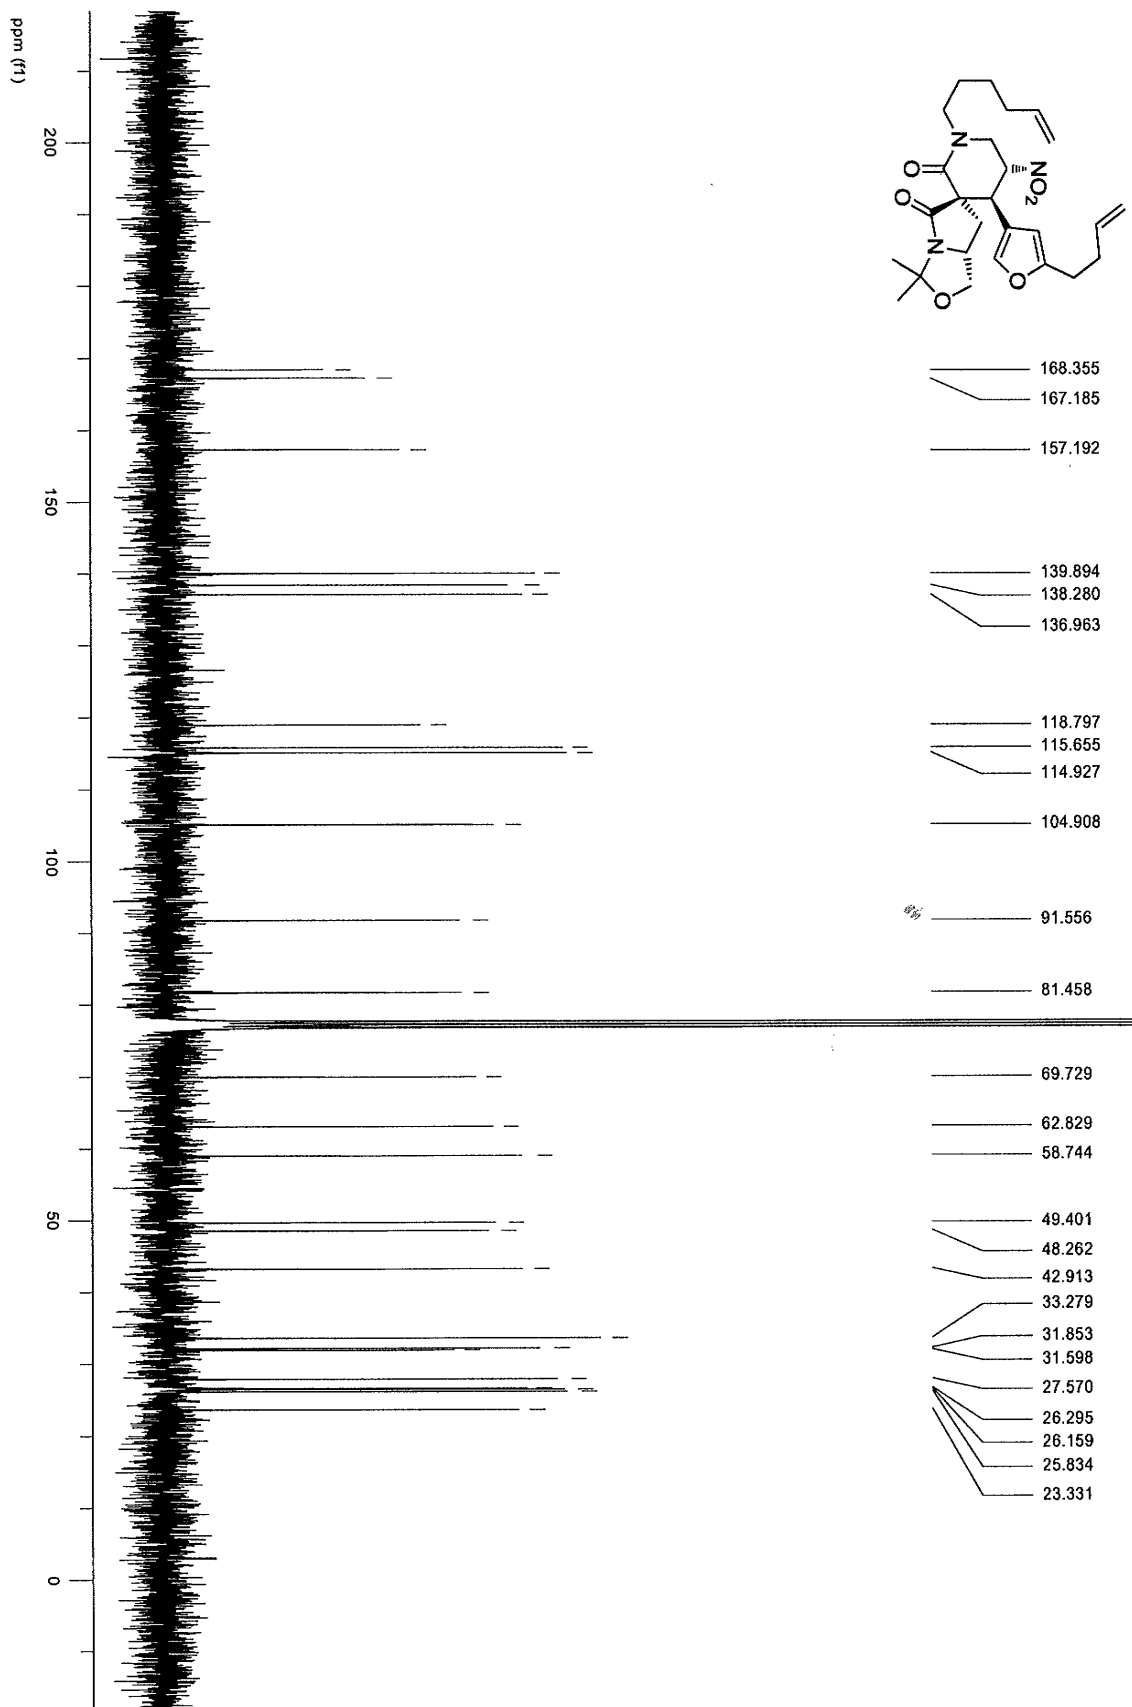

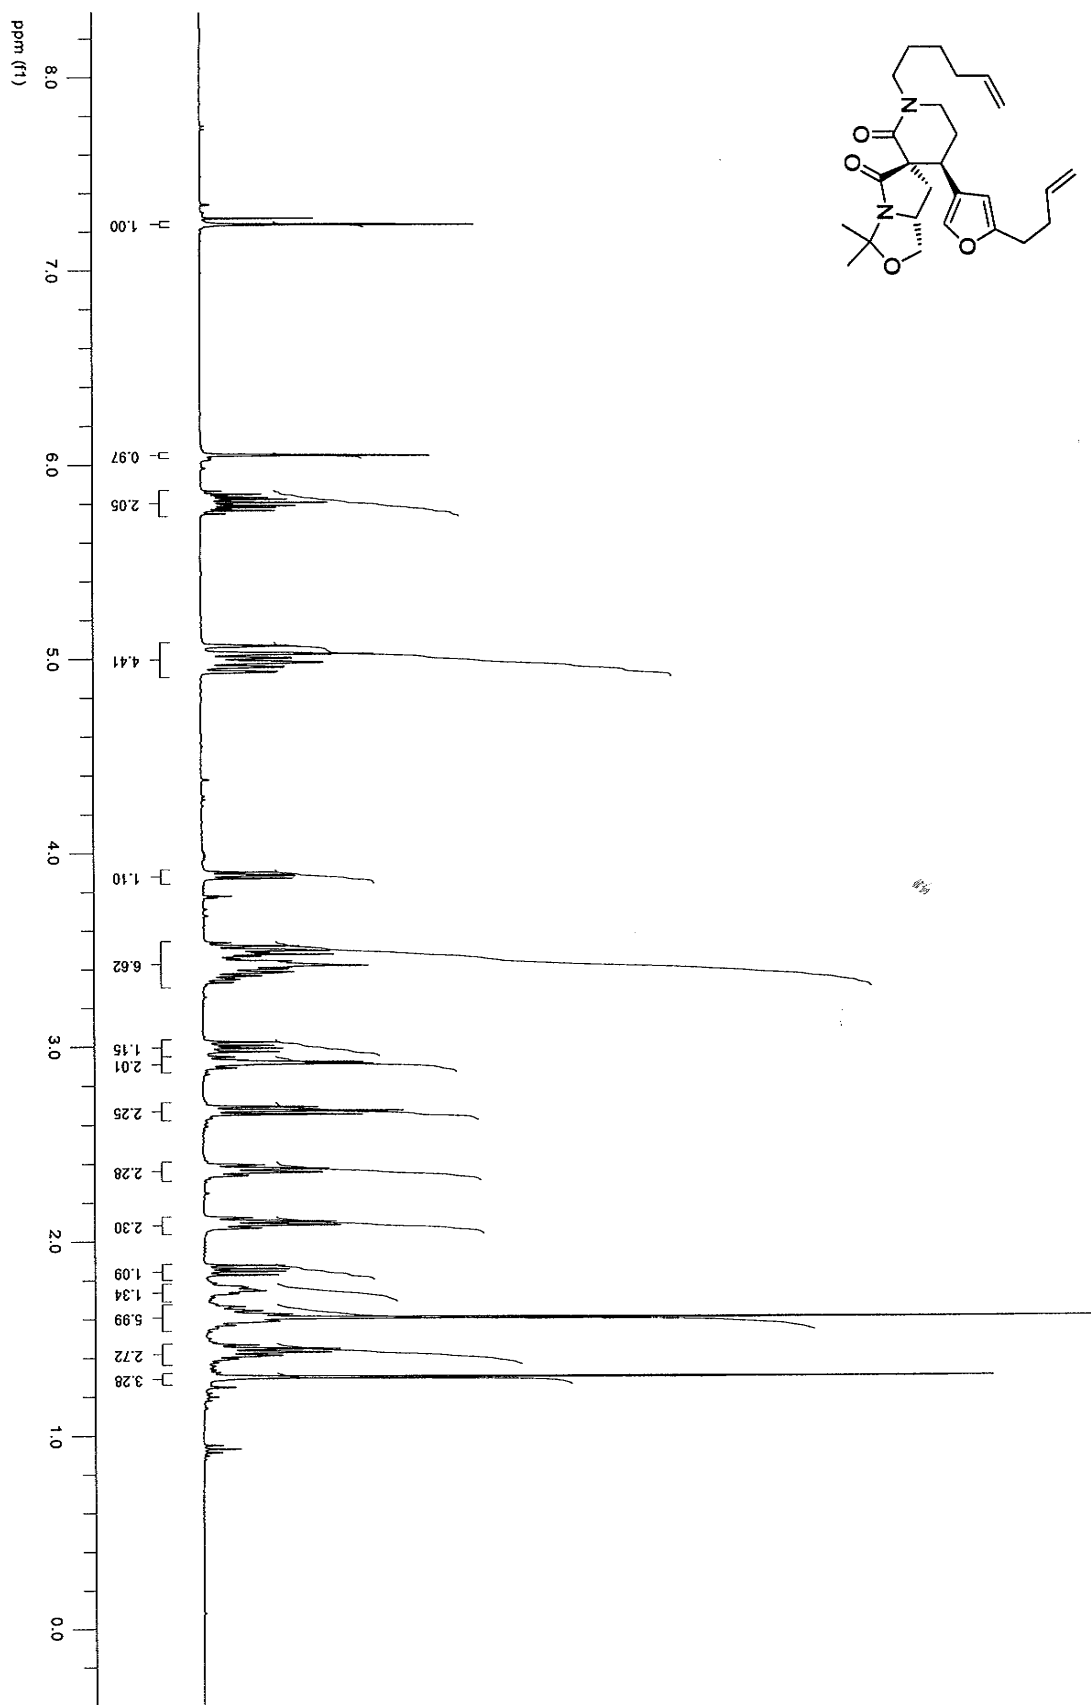

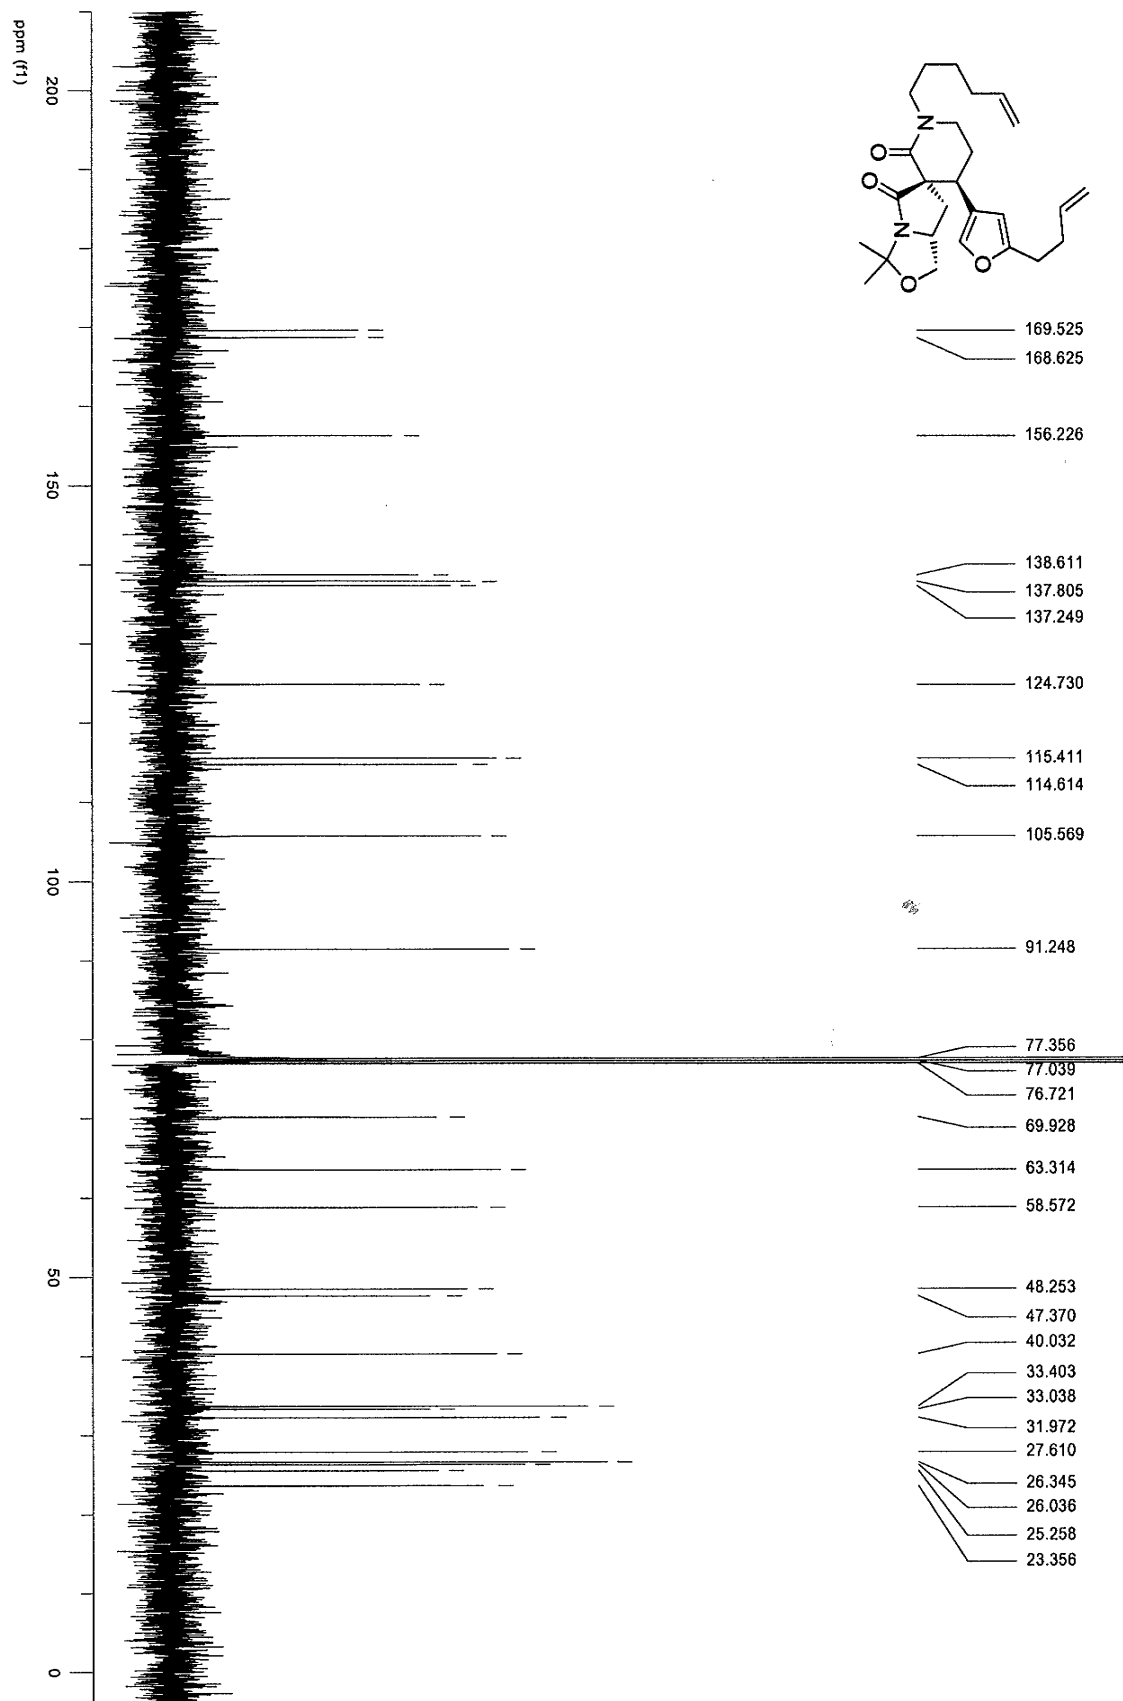

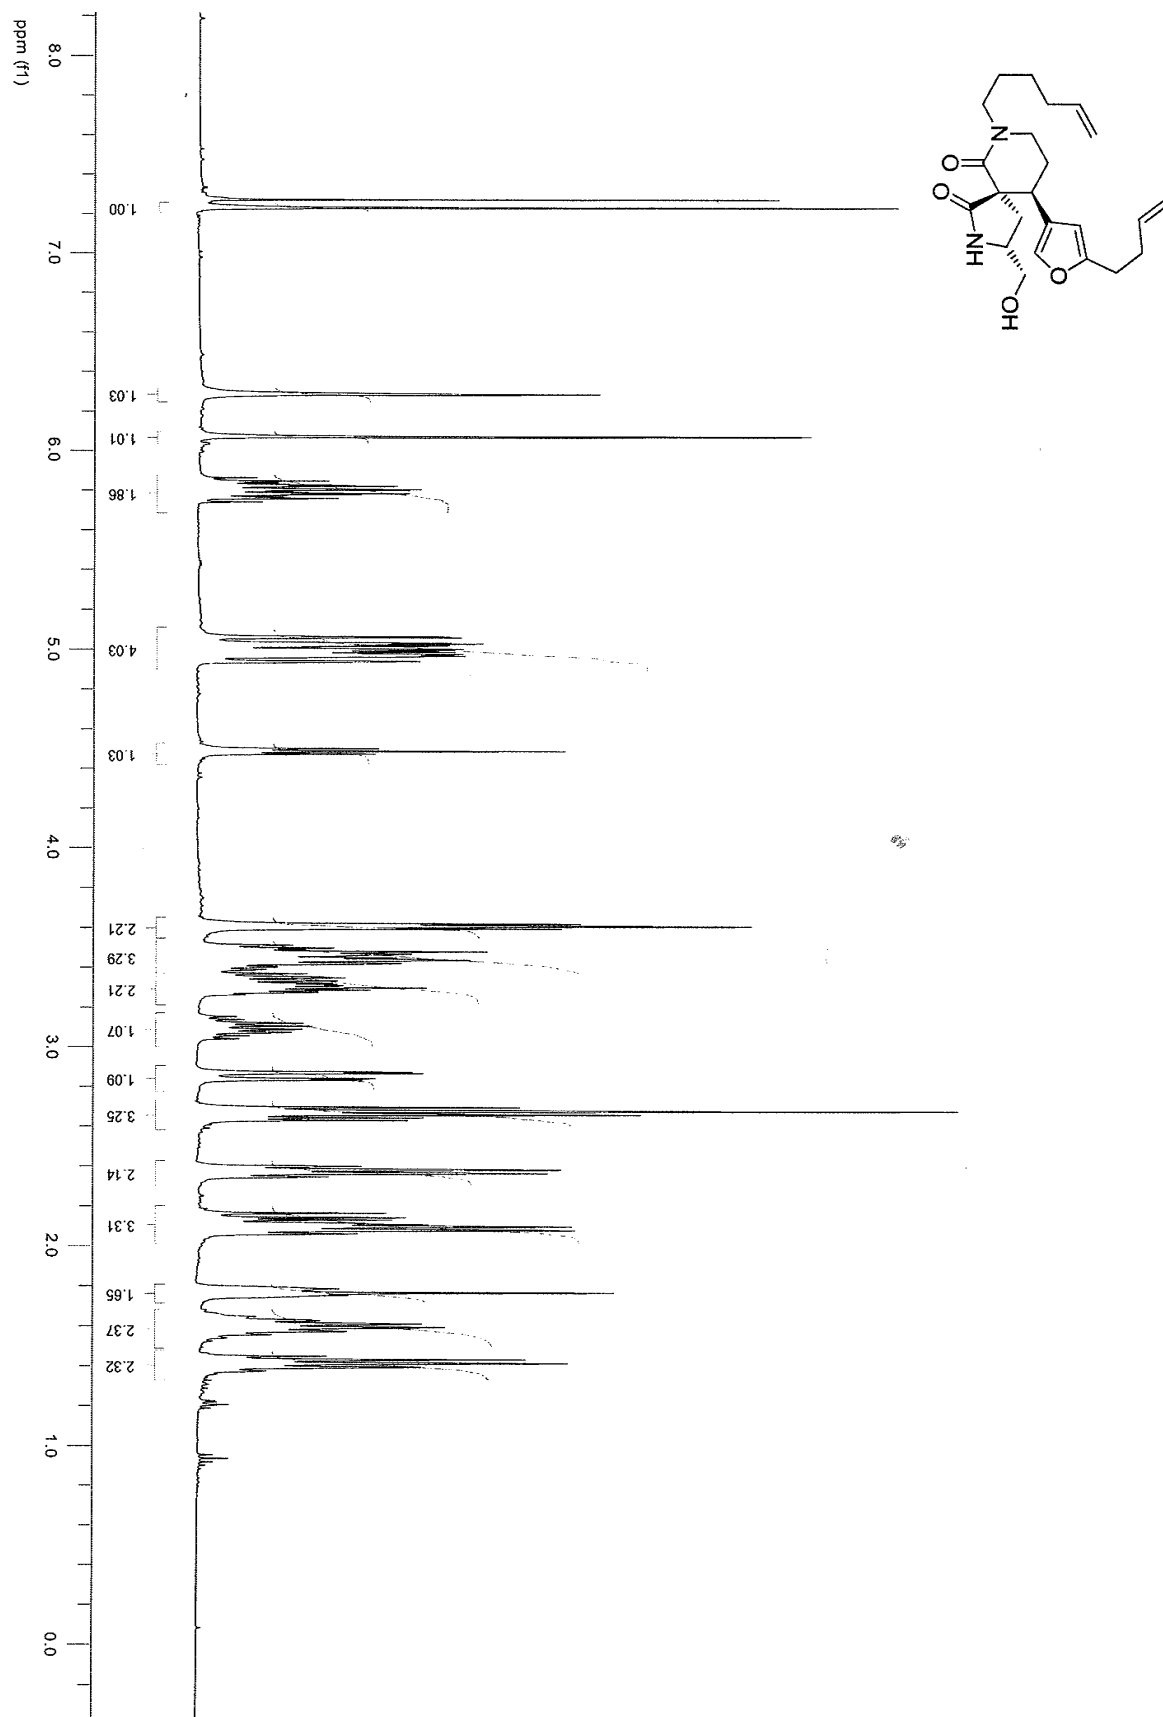

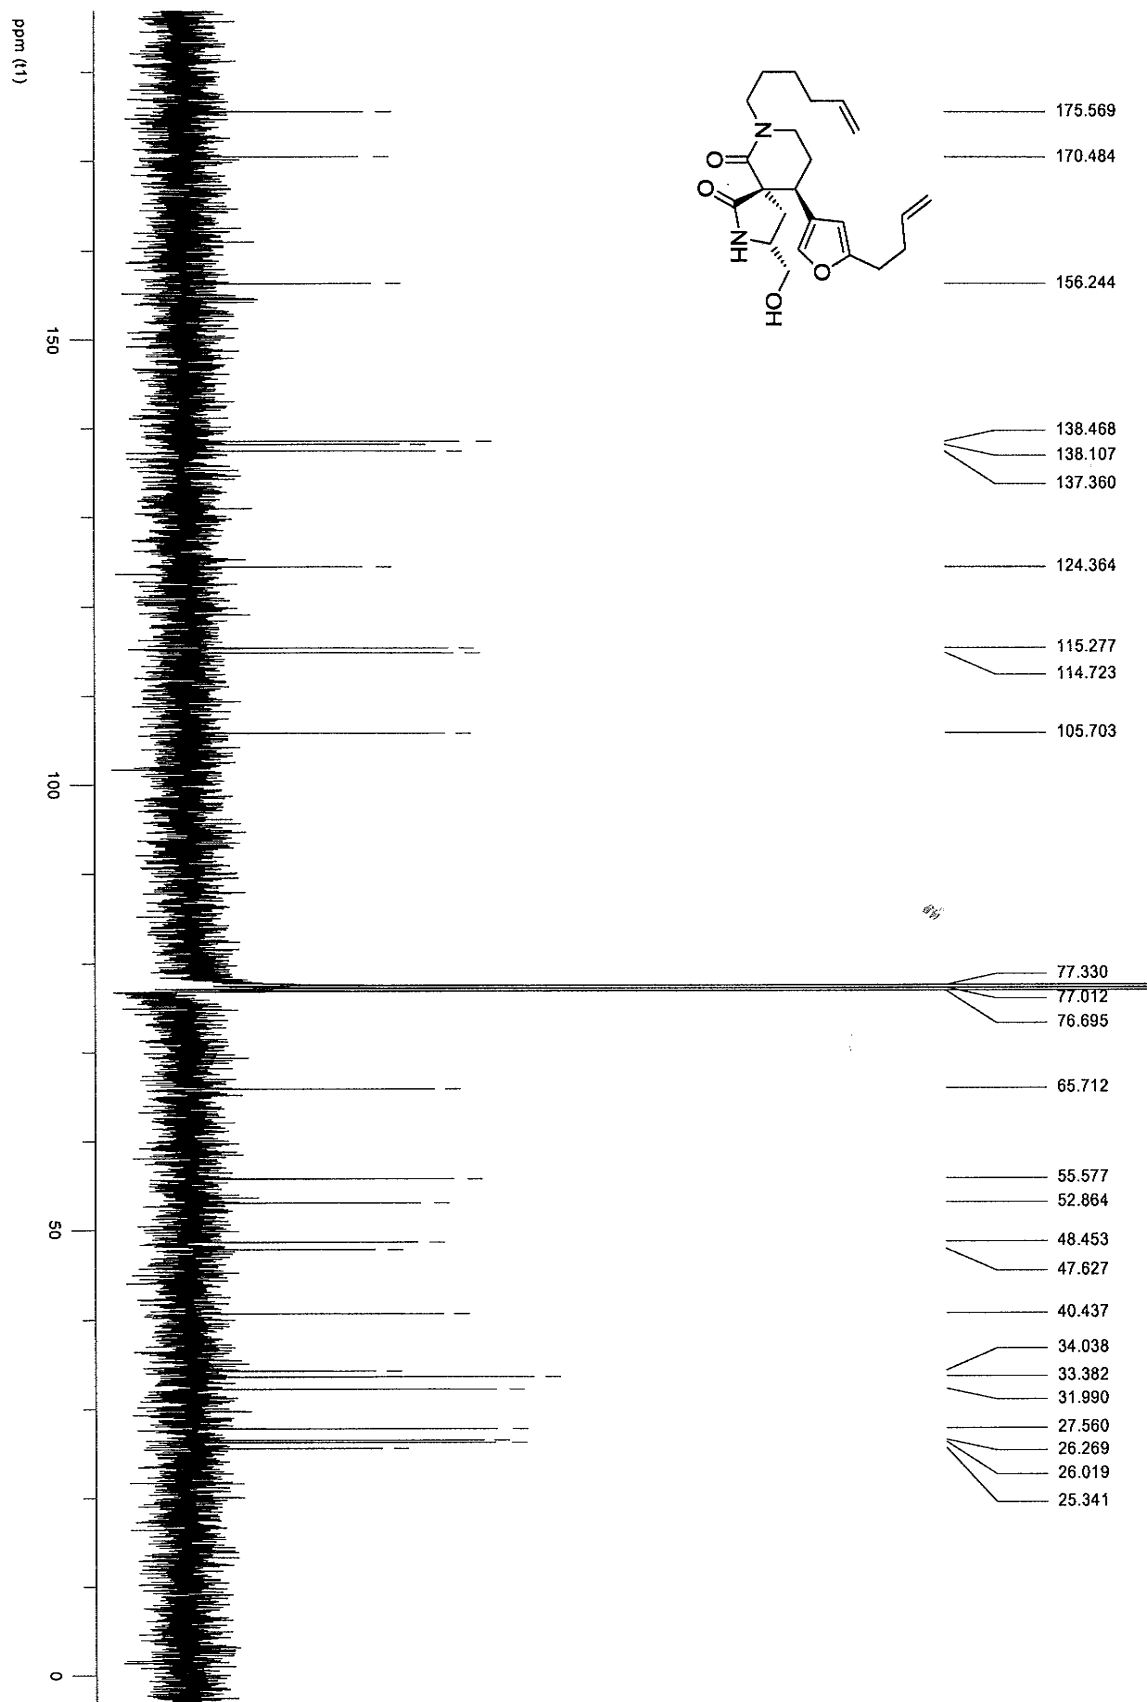

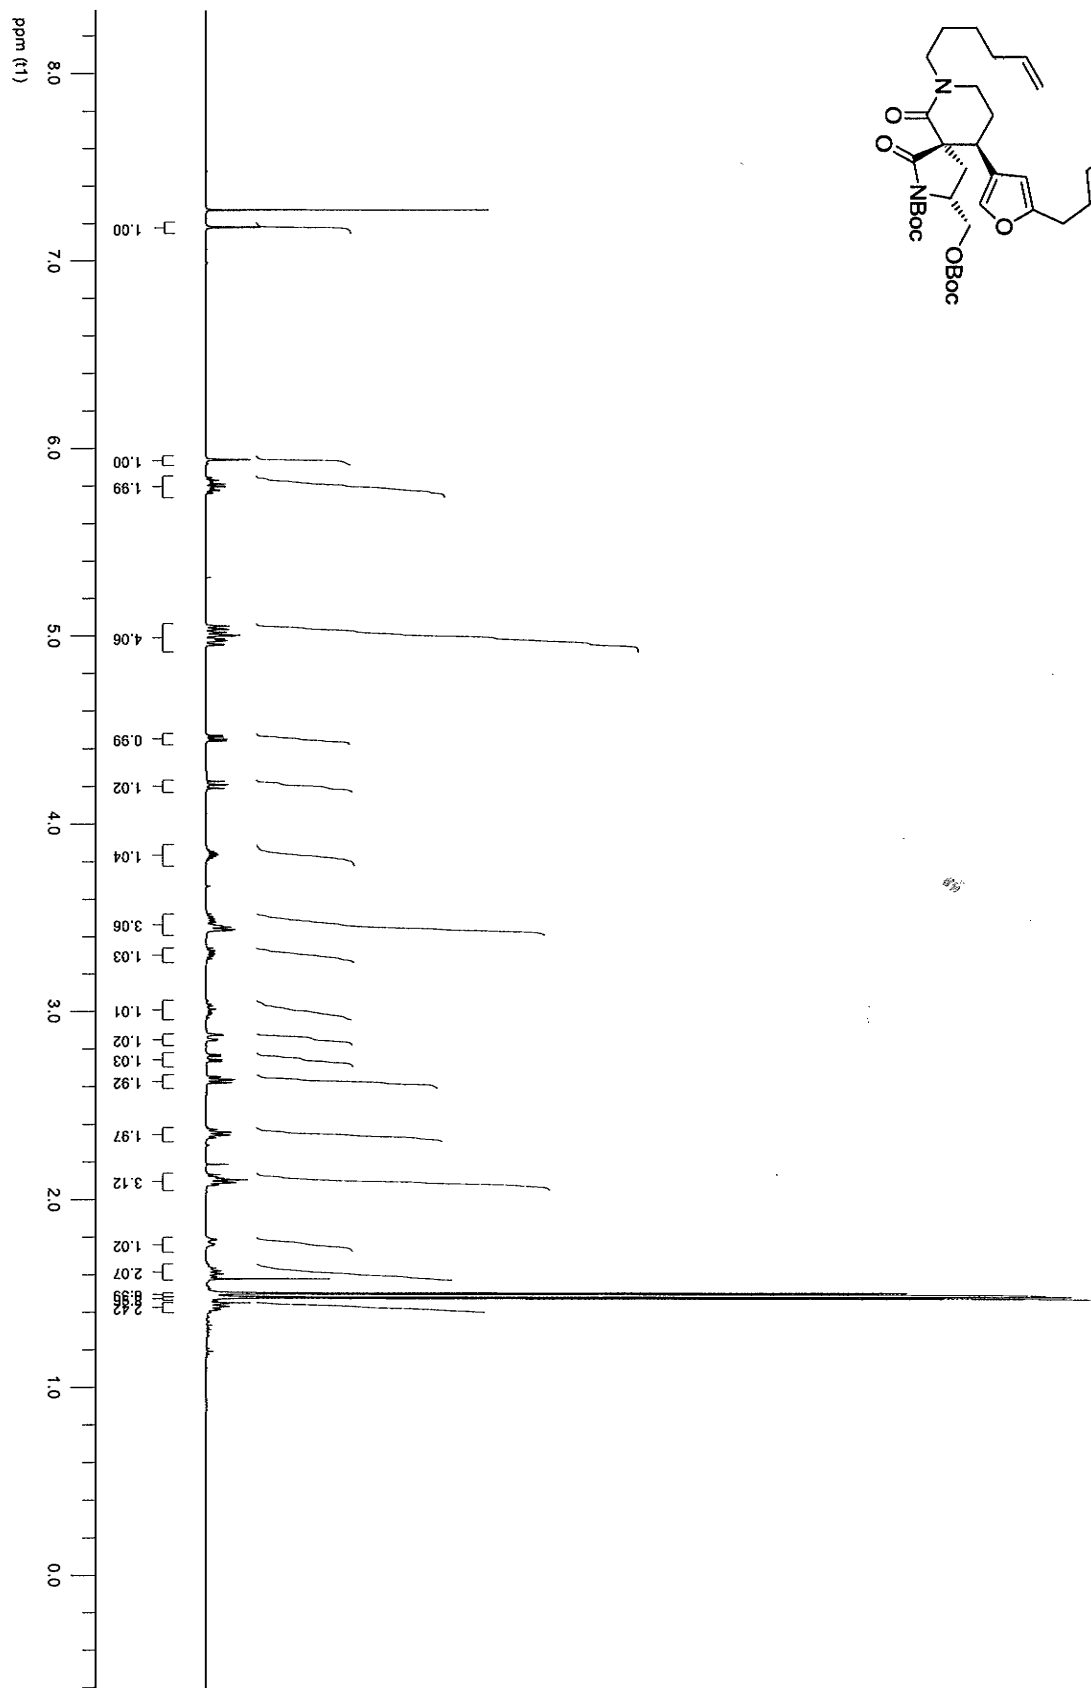



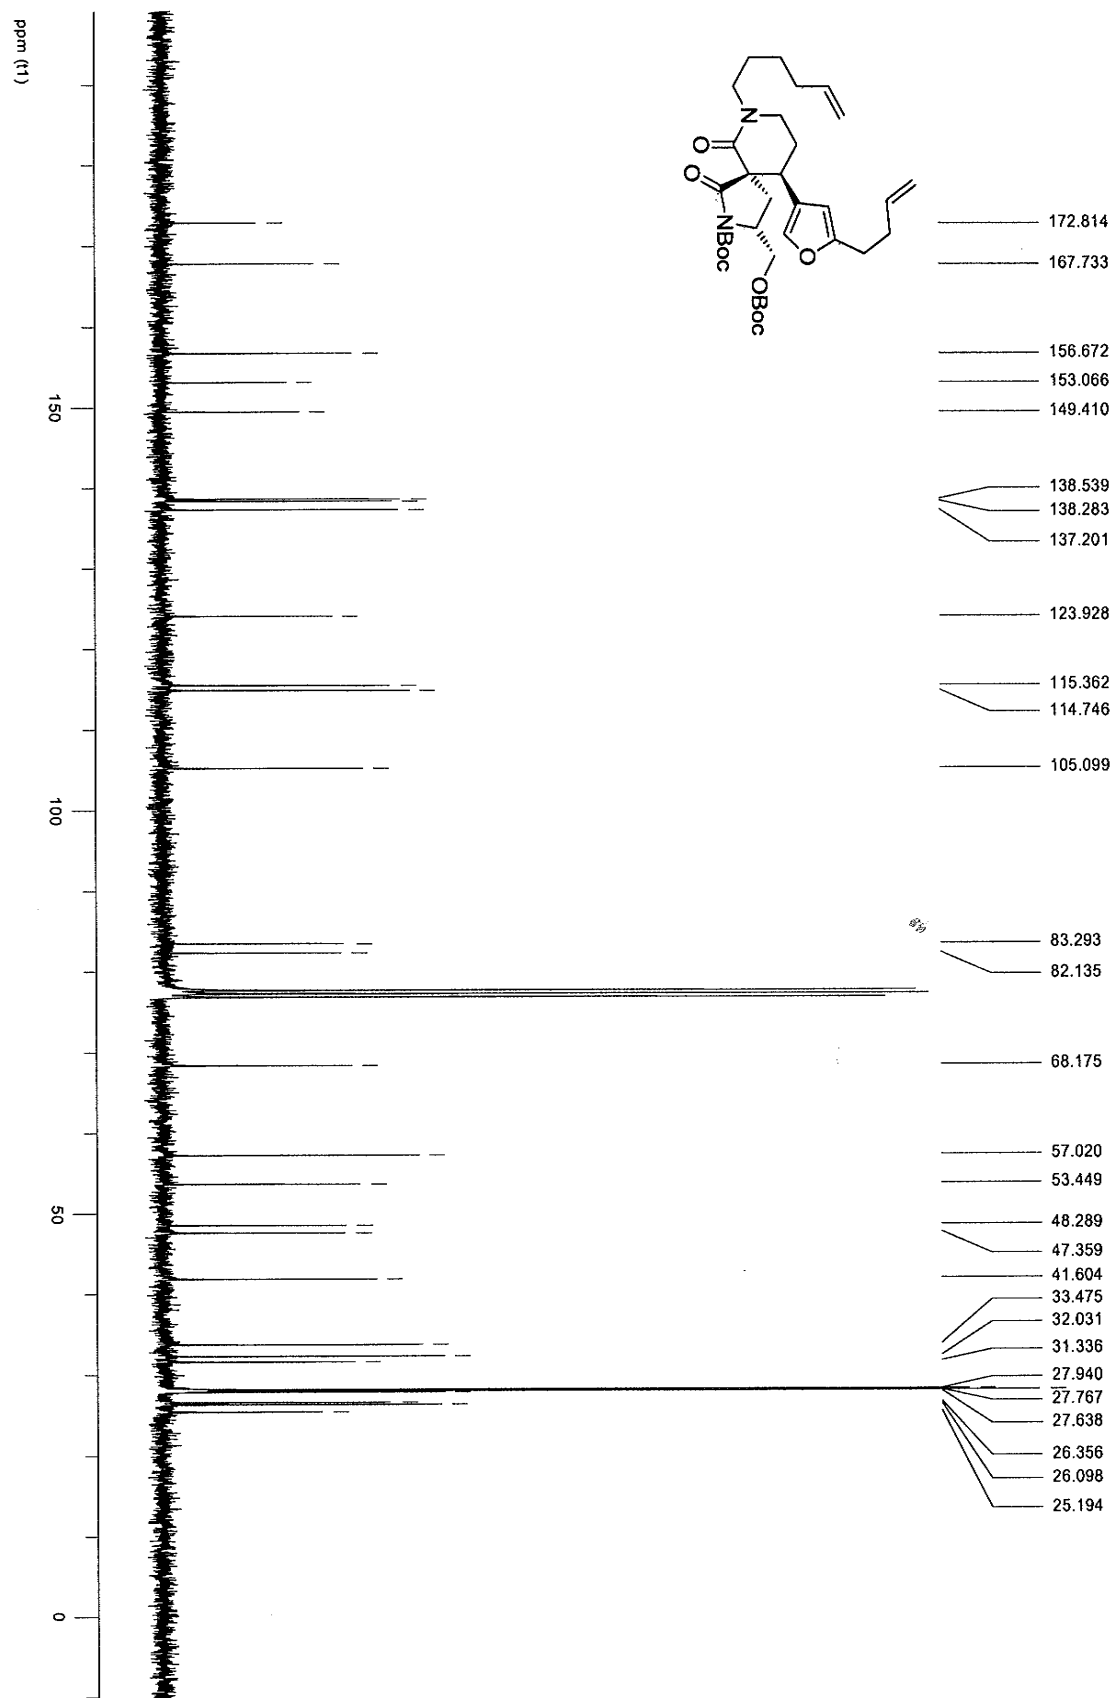

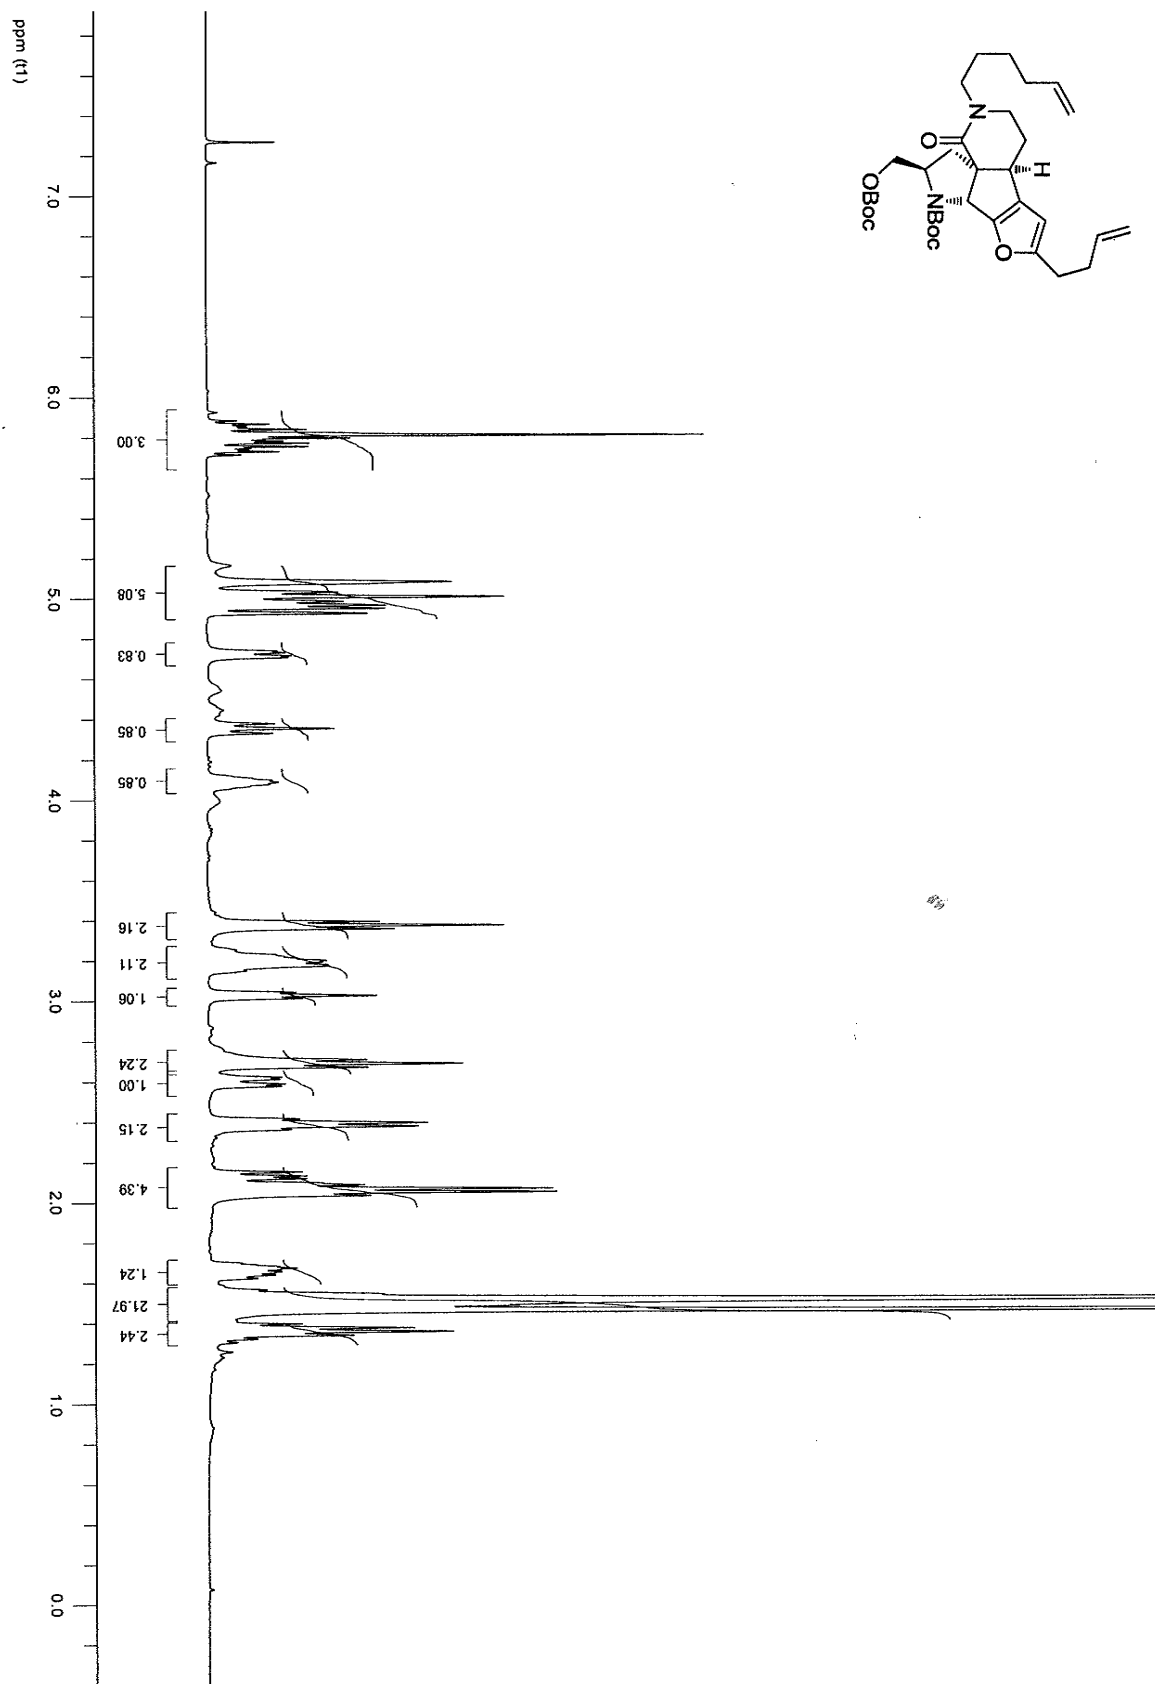

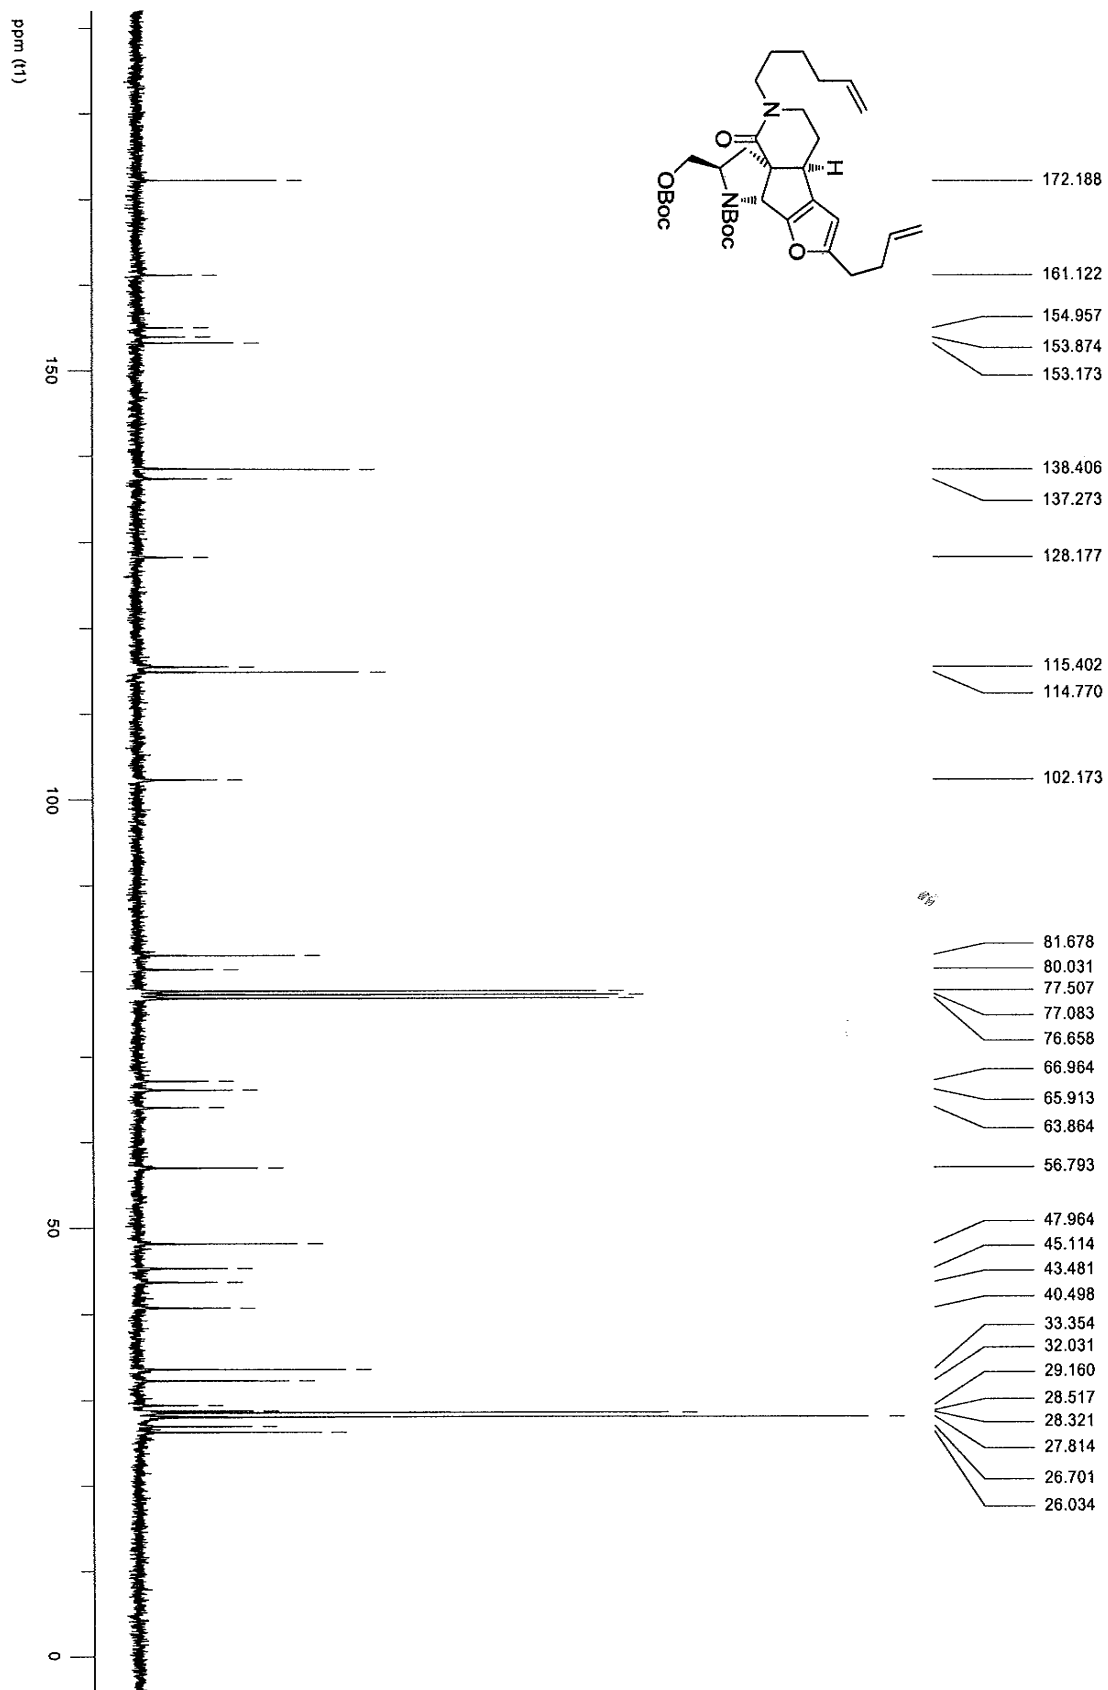

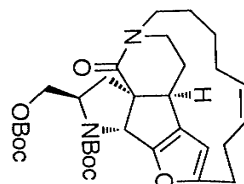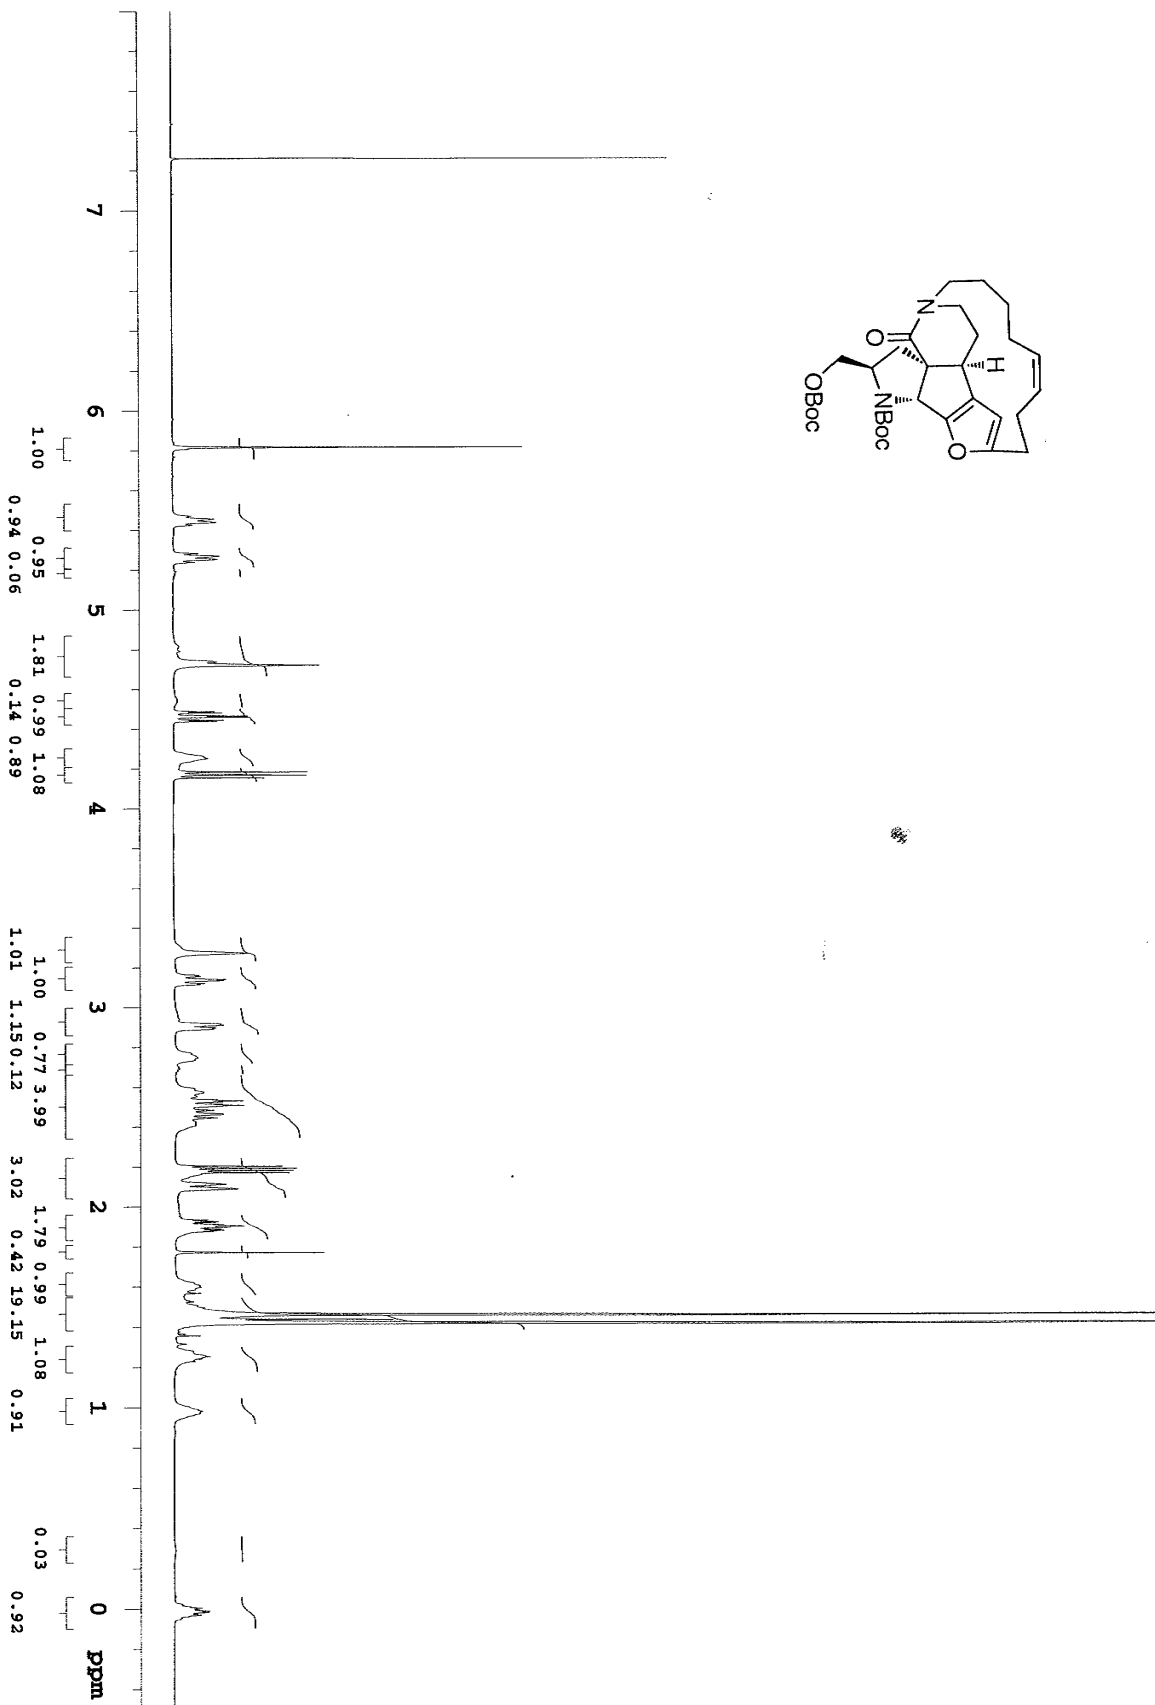

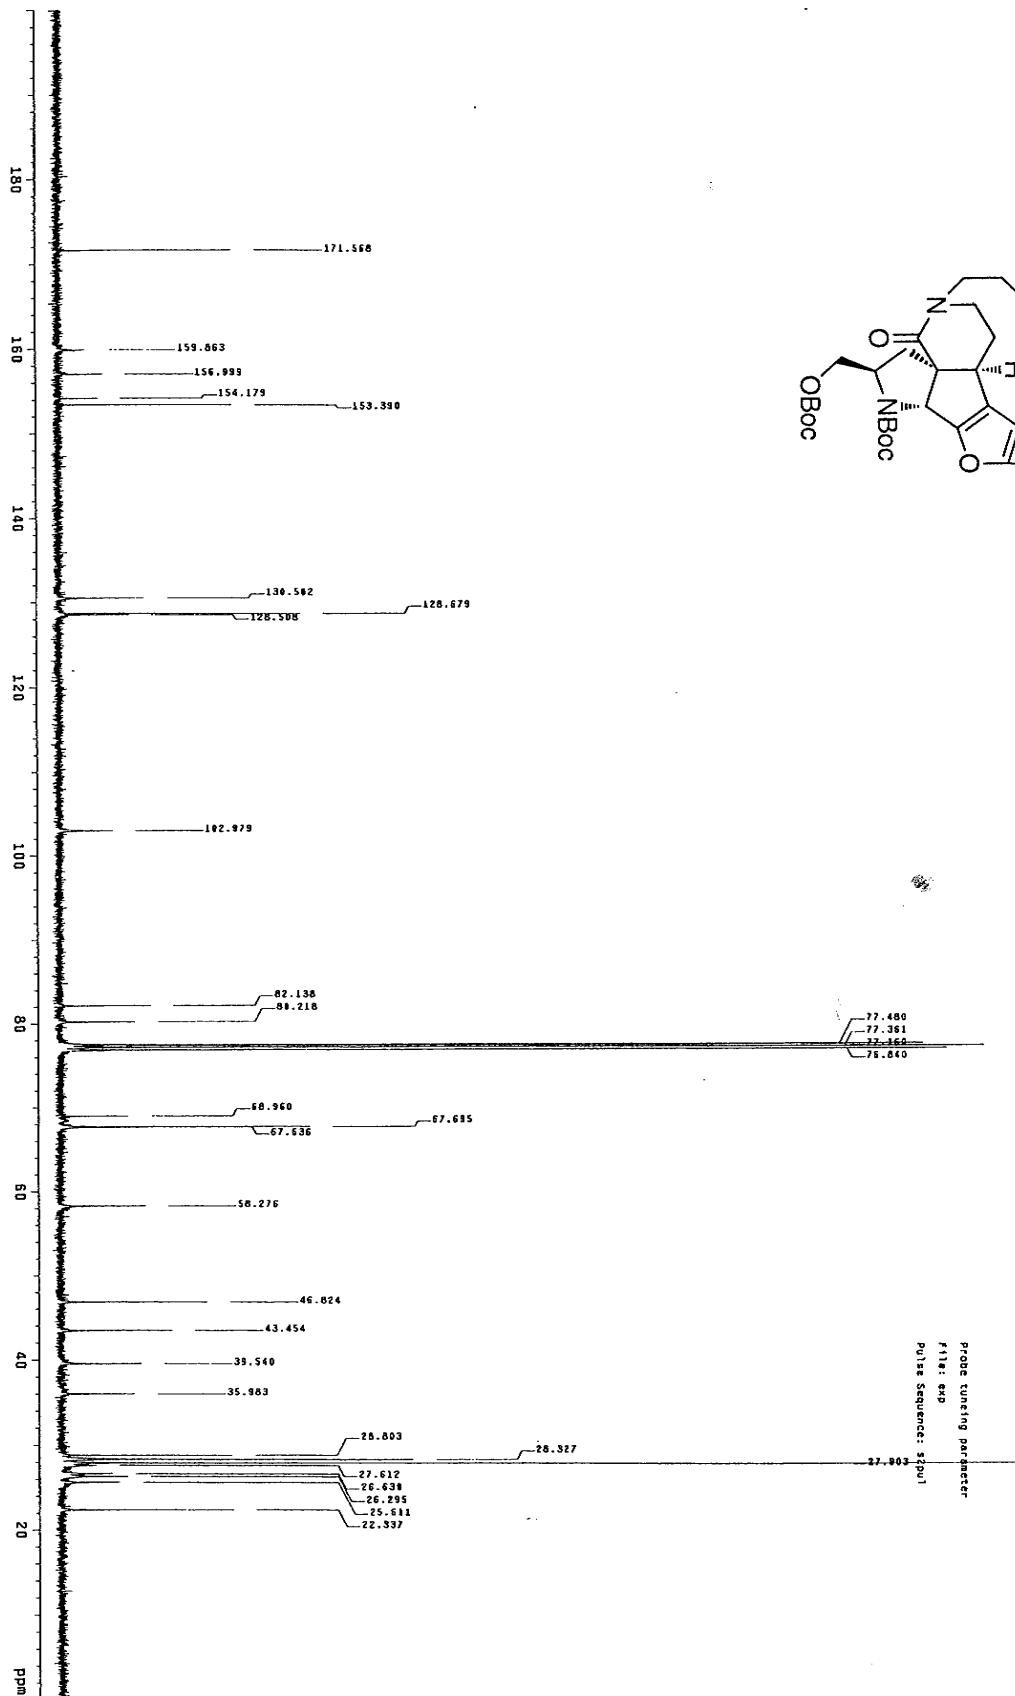

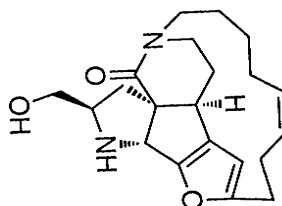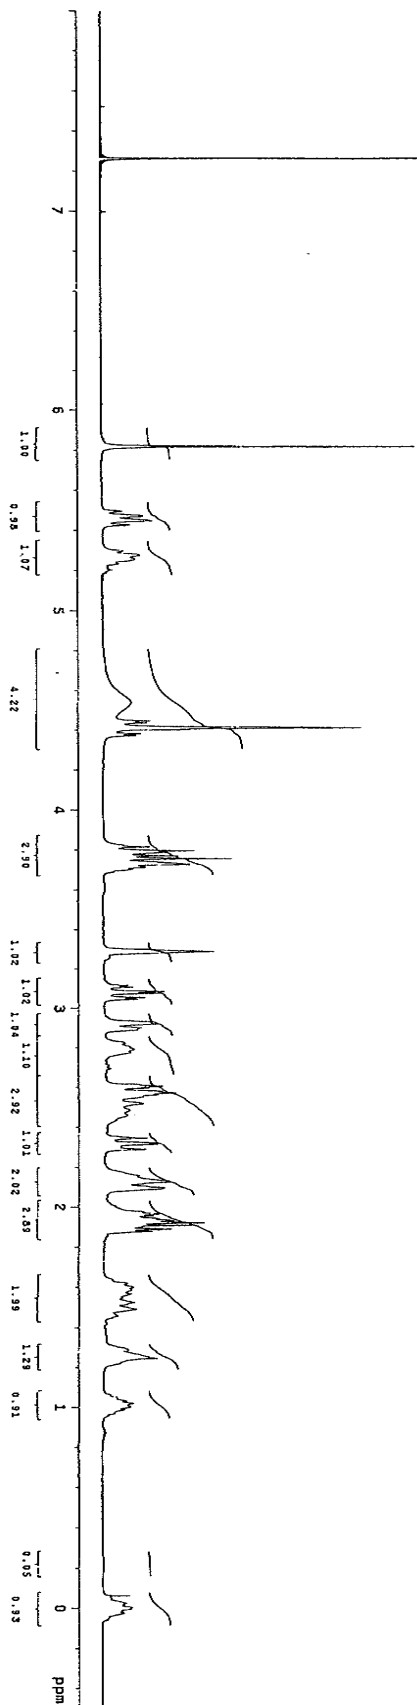

SAMPLE: MW-IV-148-F-1  
FILE: ssp  
PULSE SEQUENCE: zgpg30

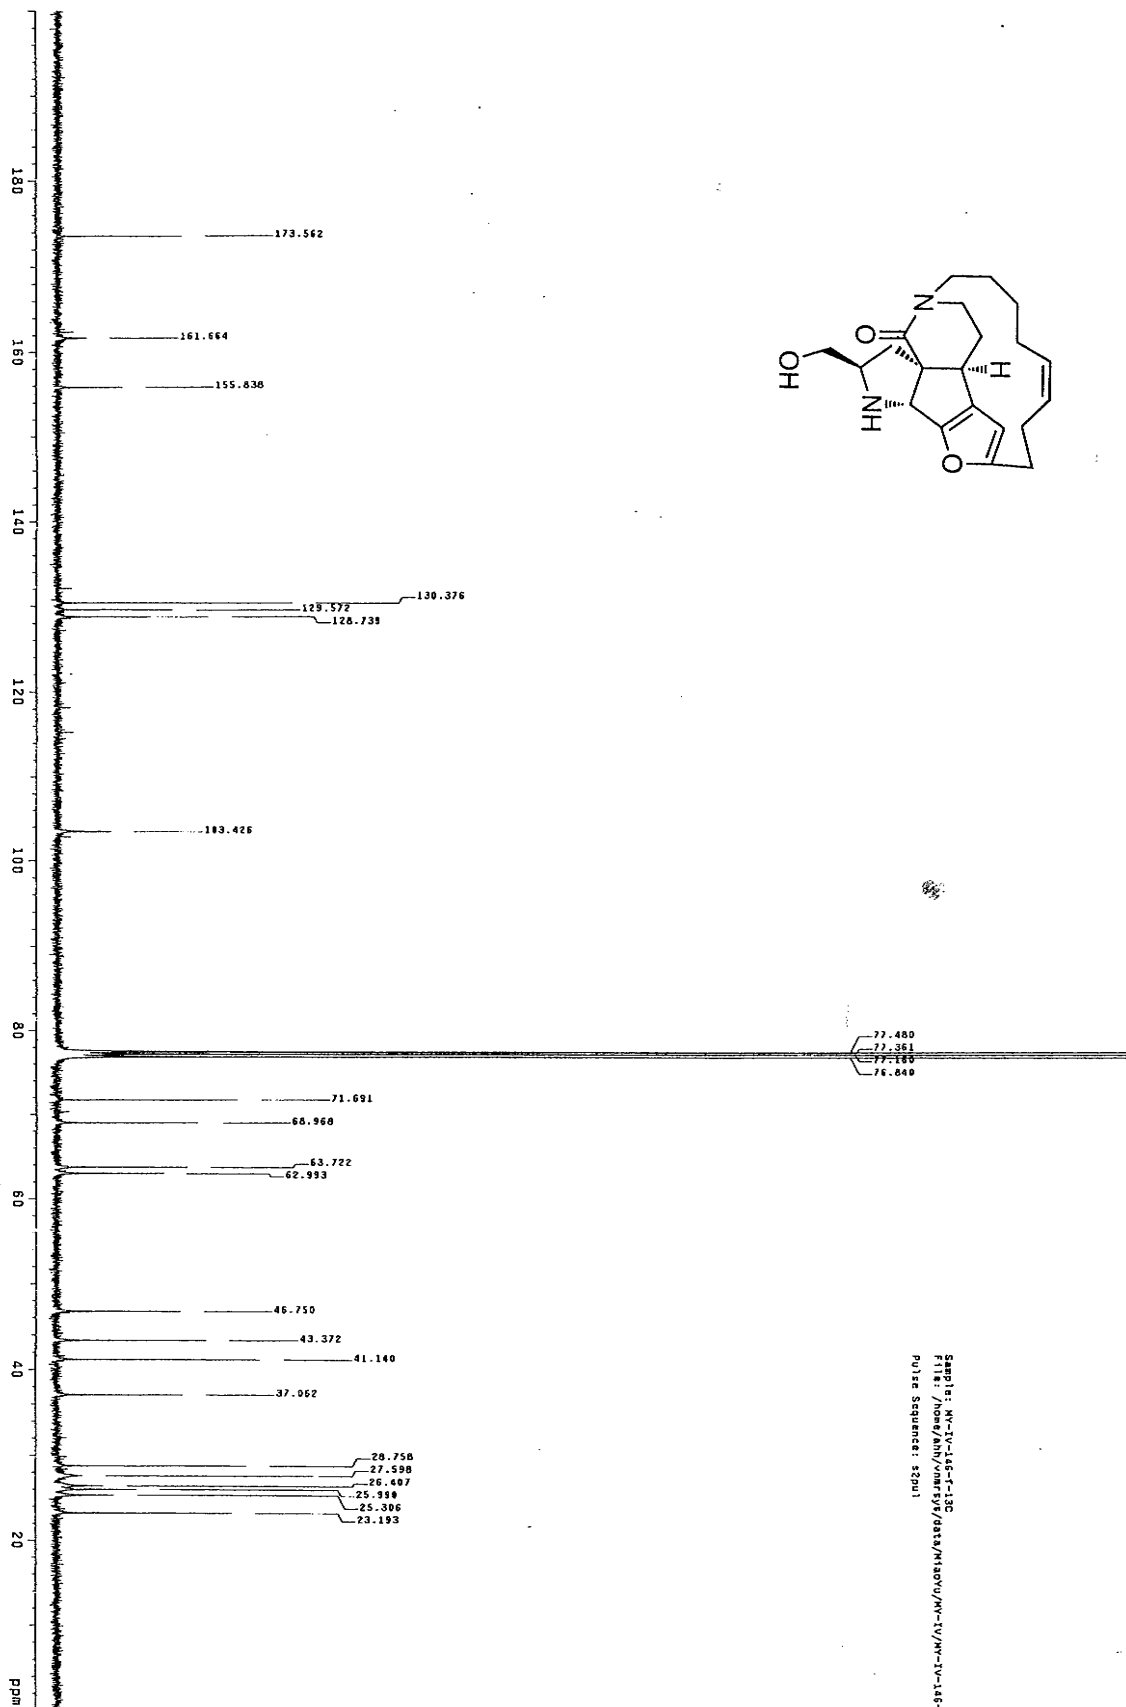

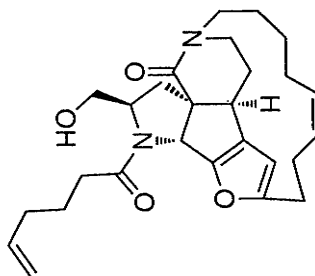

Sample: MV-150-F  
1101 cap  
Pulse Sequence: zgpg1

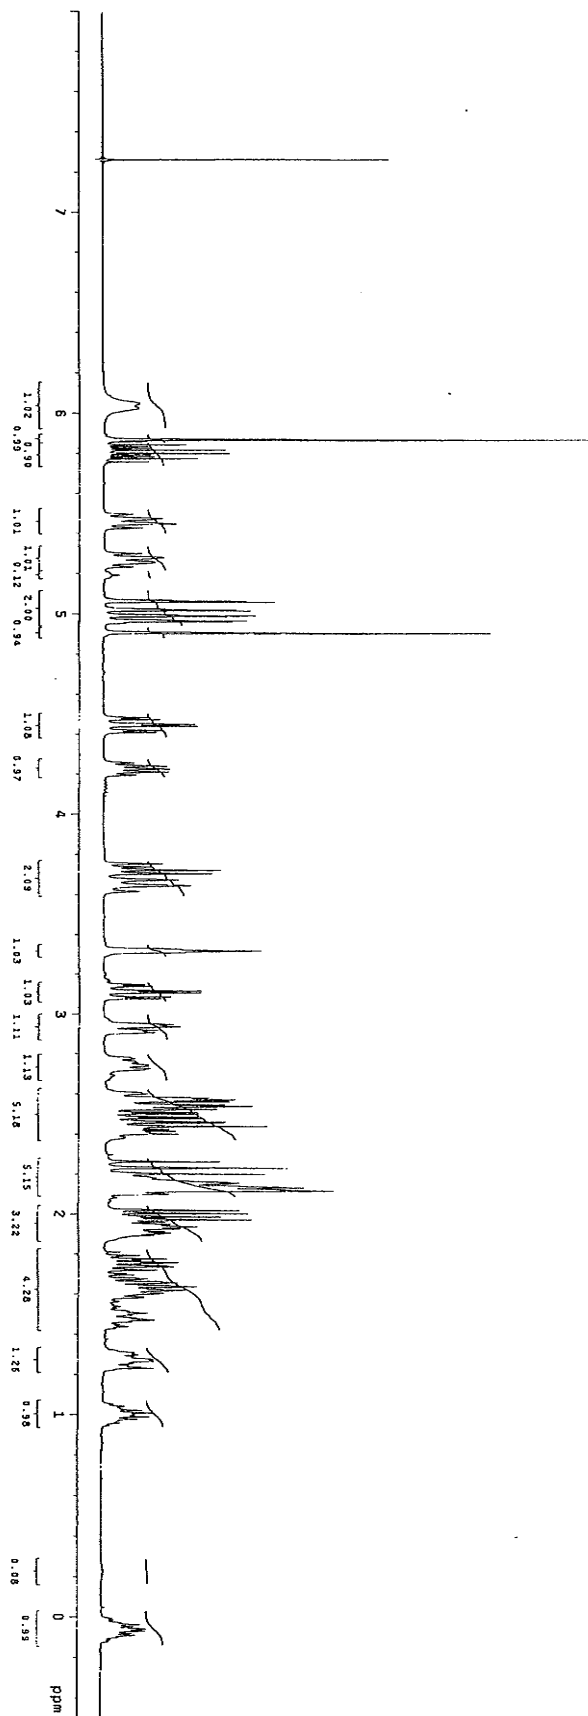



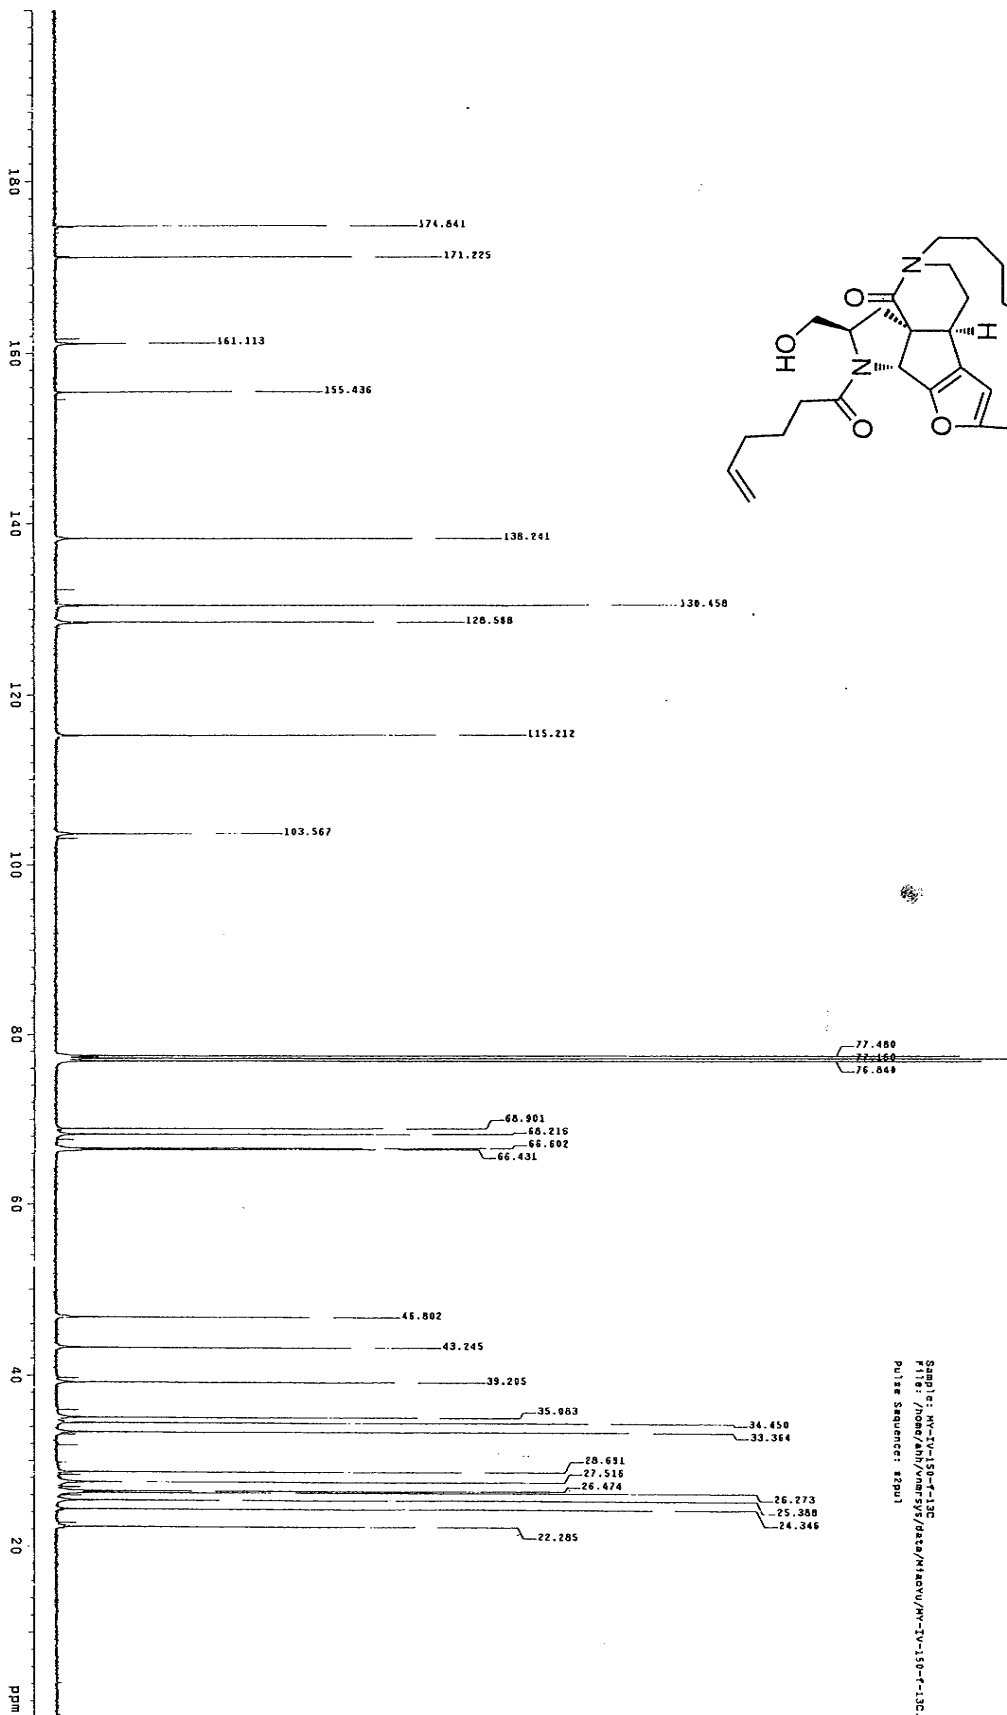



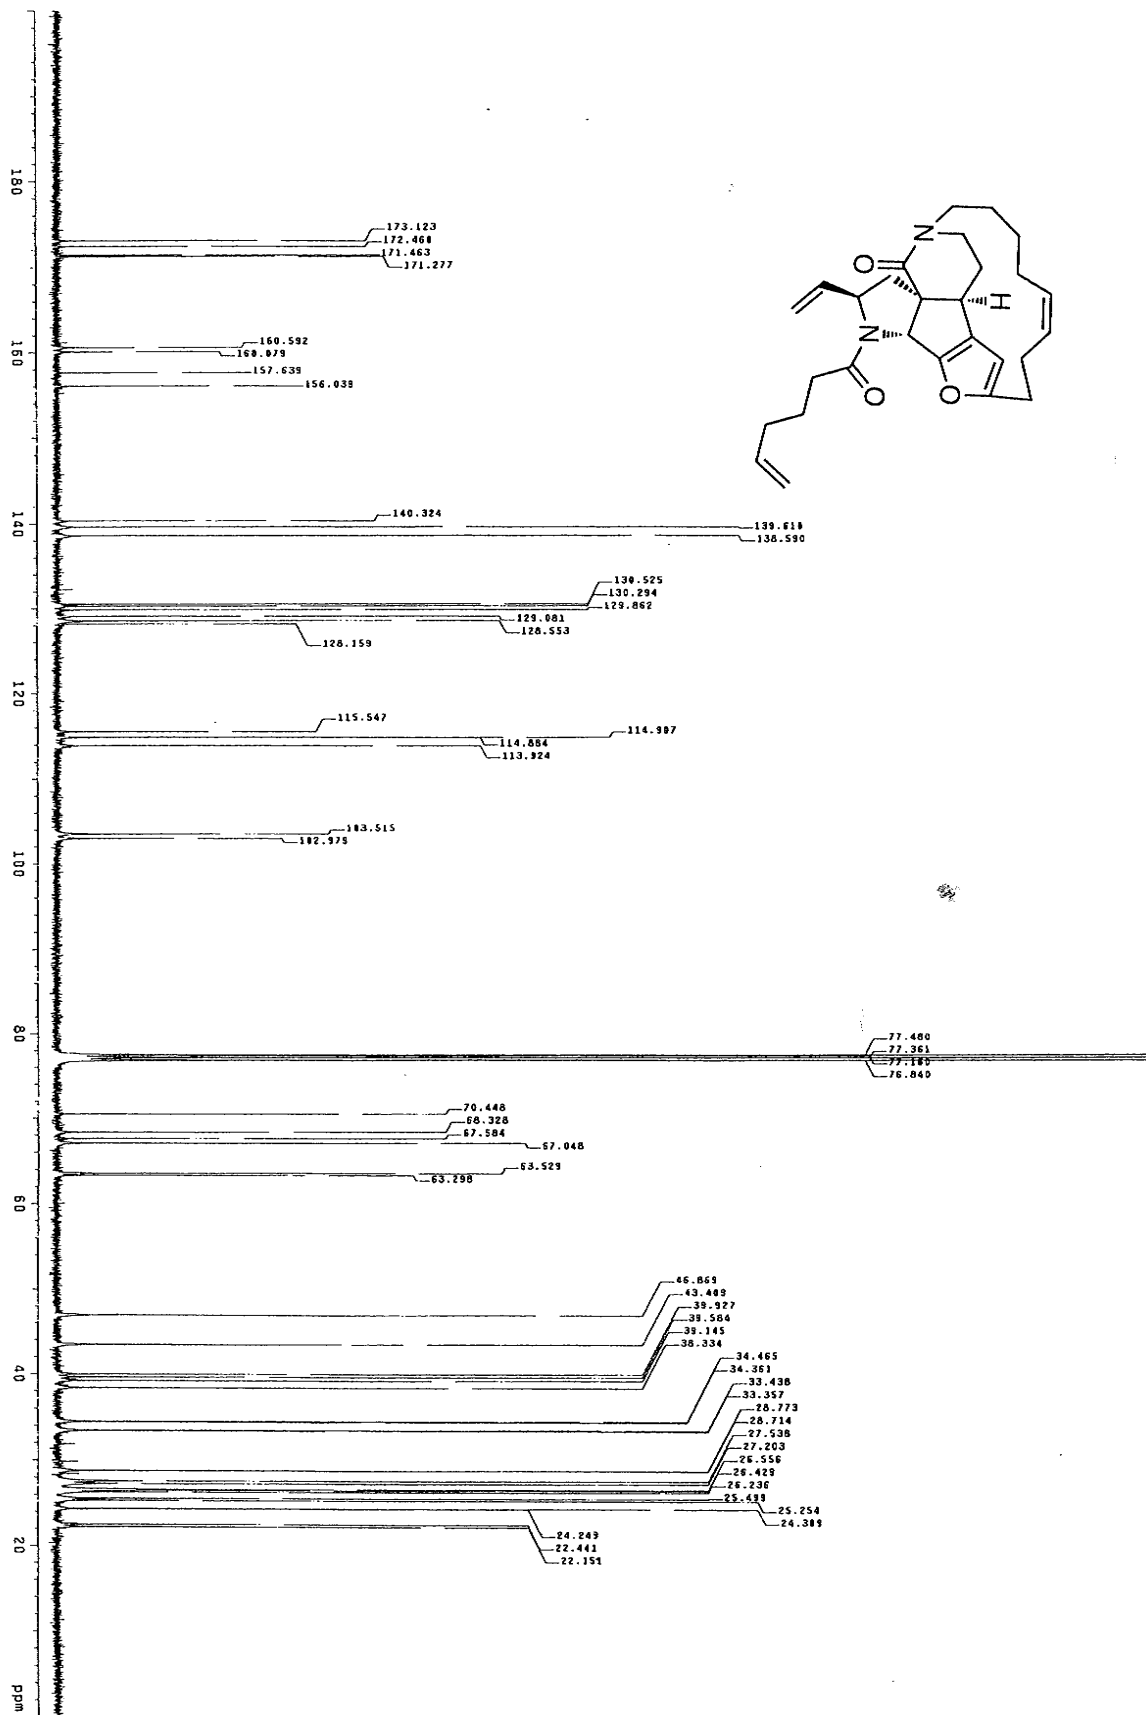



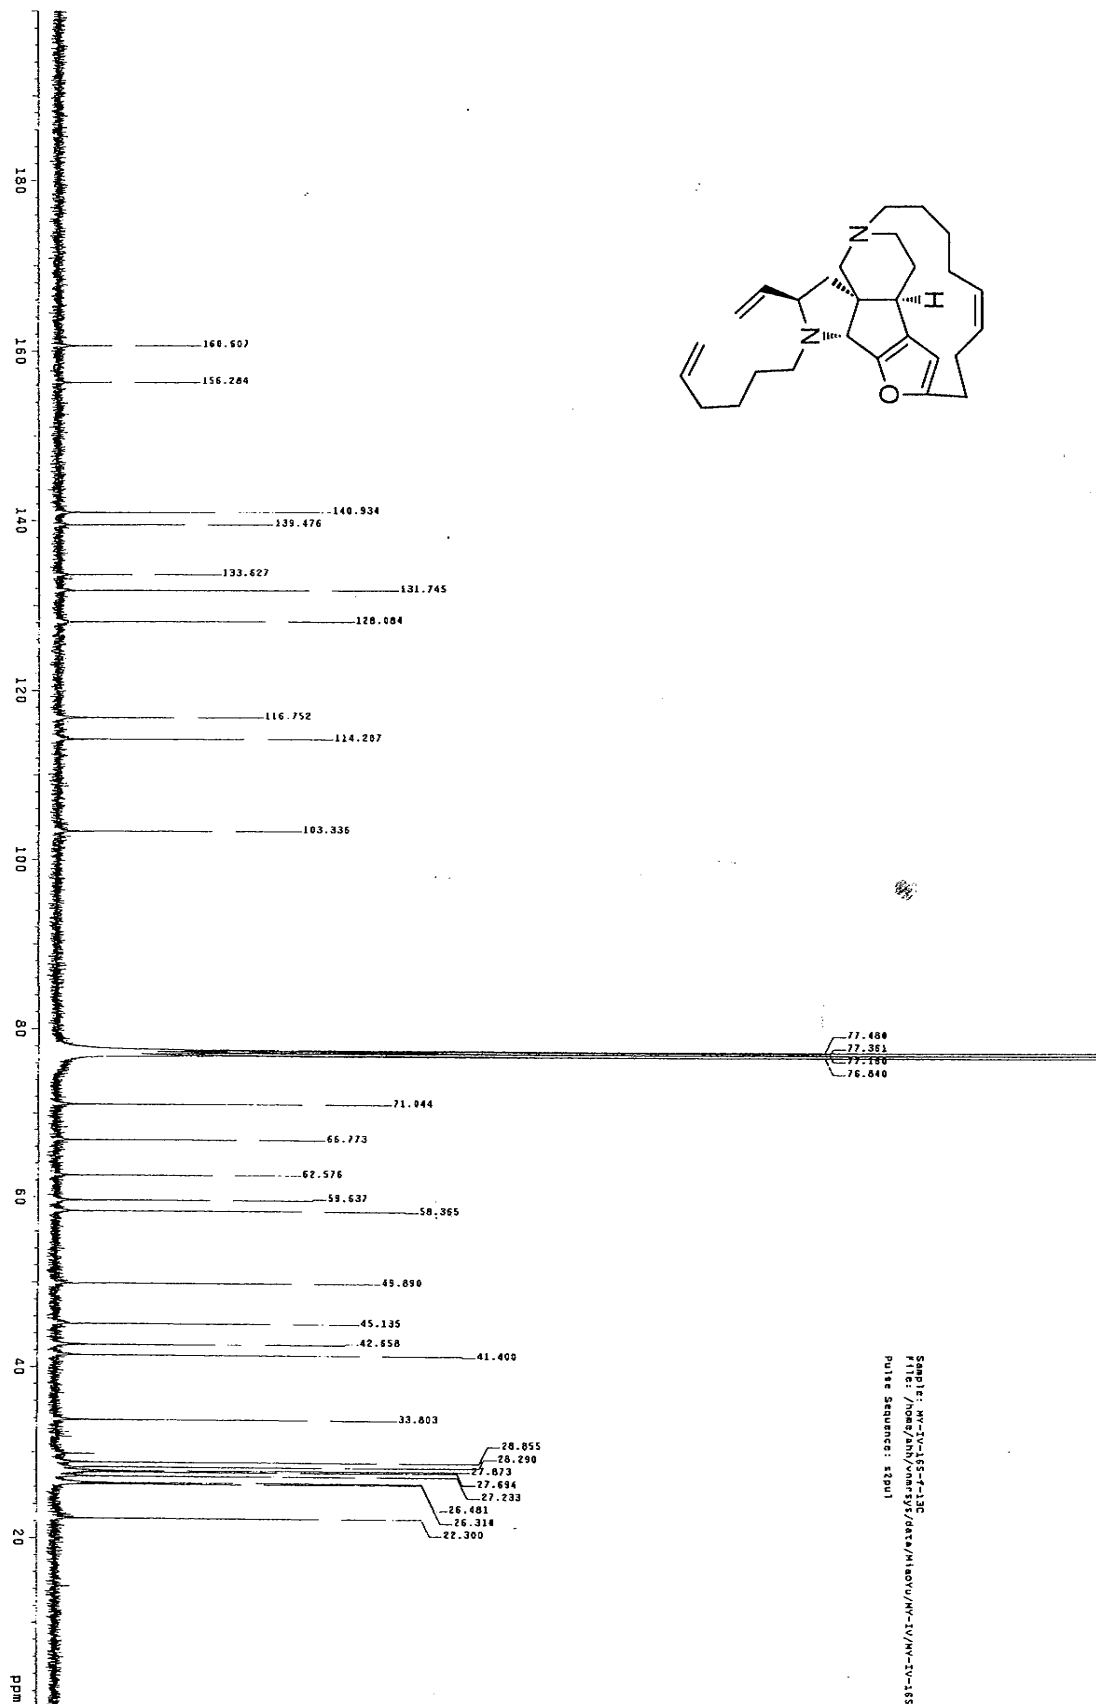

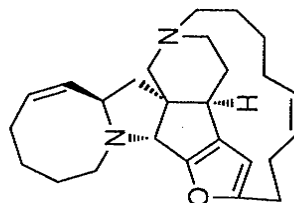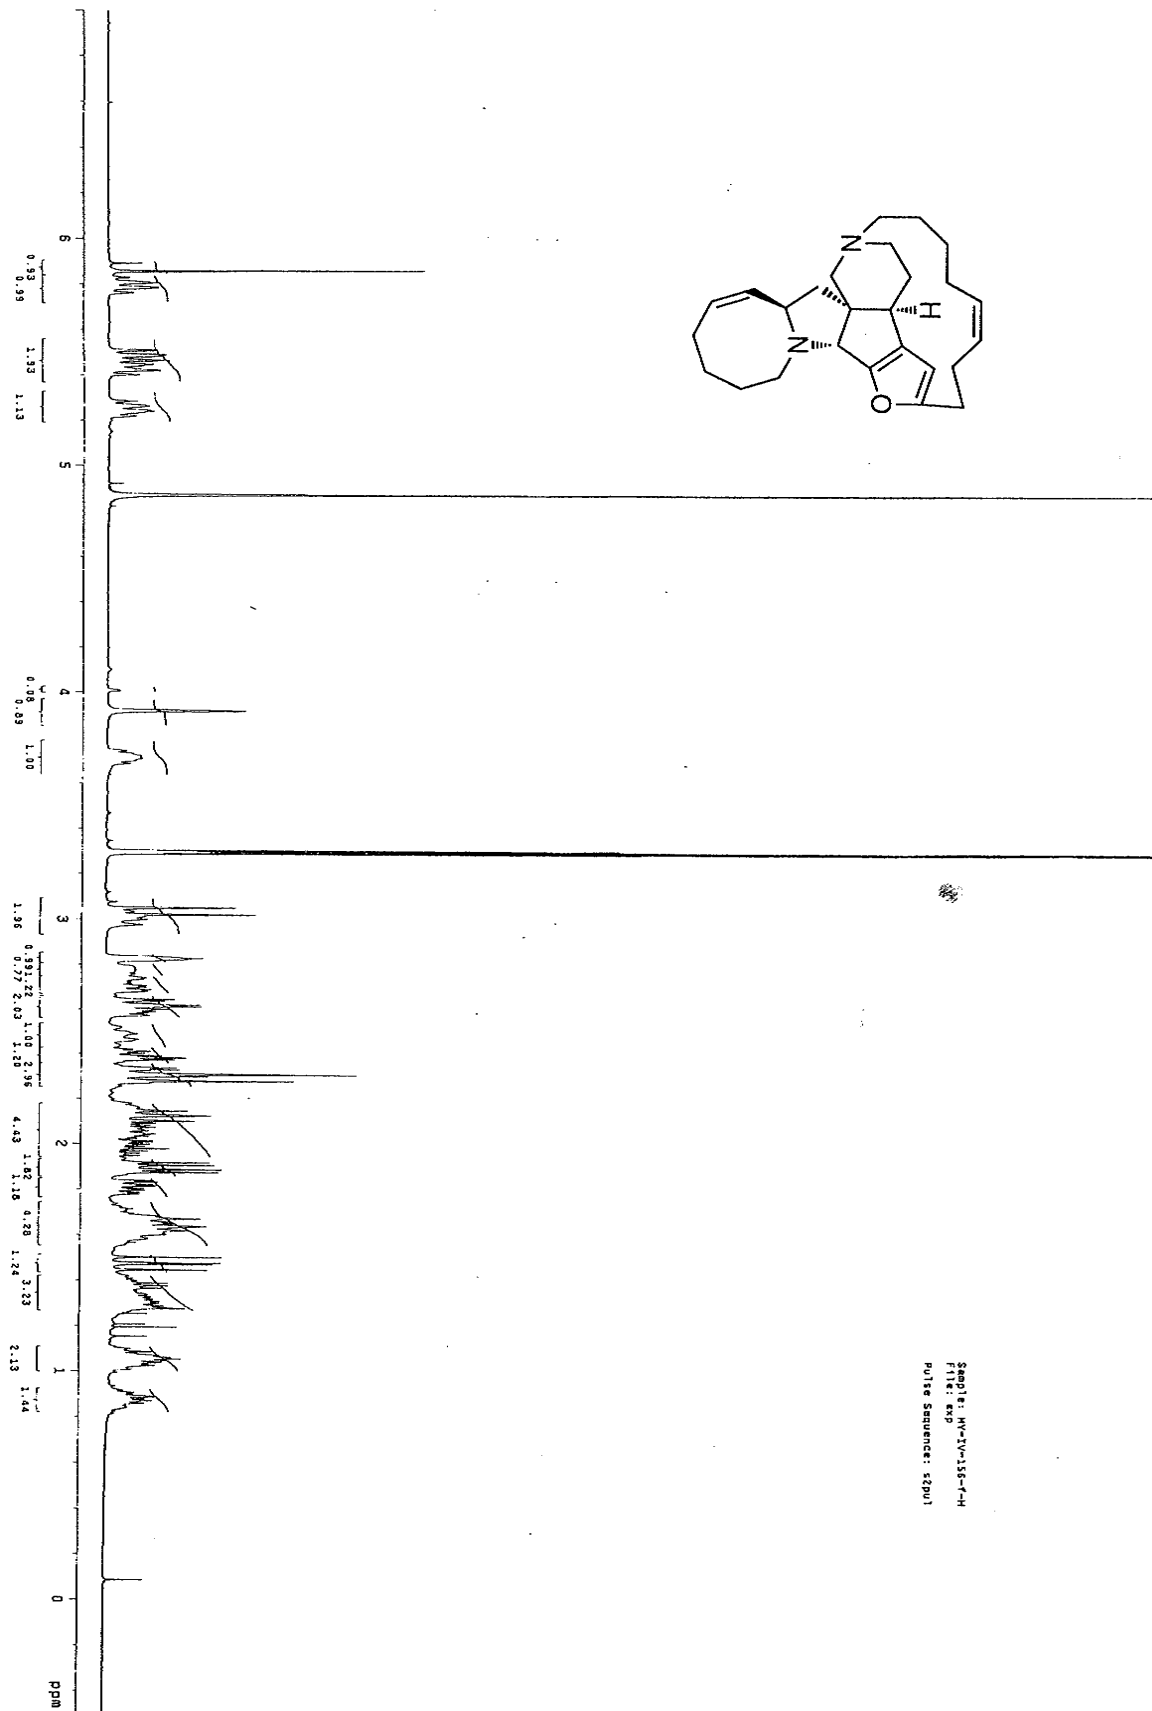

Sample: M-11-15-4-H  
File: exp  
Pulse sequence: zgpg30

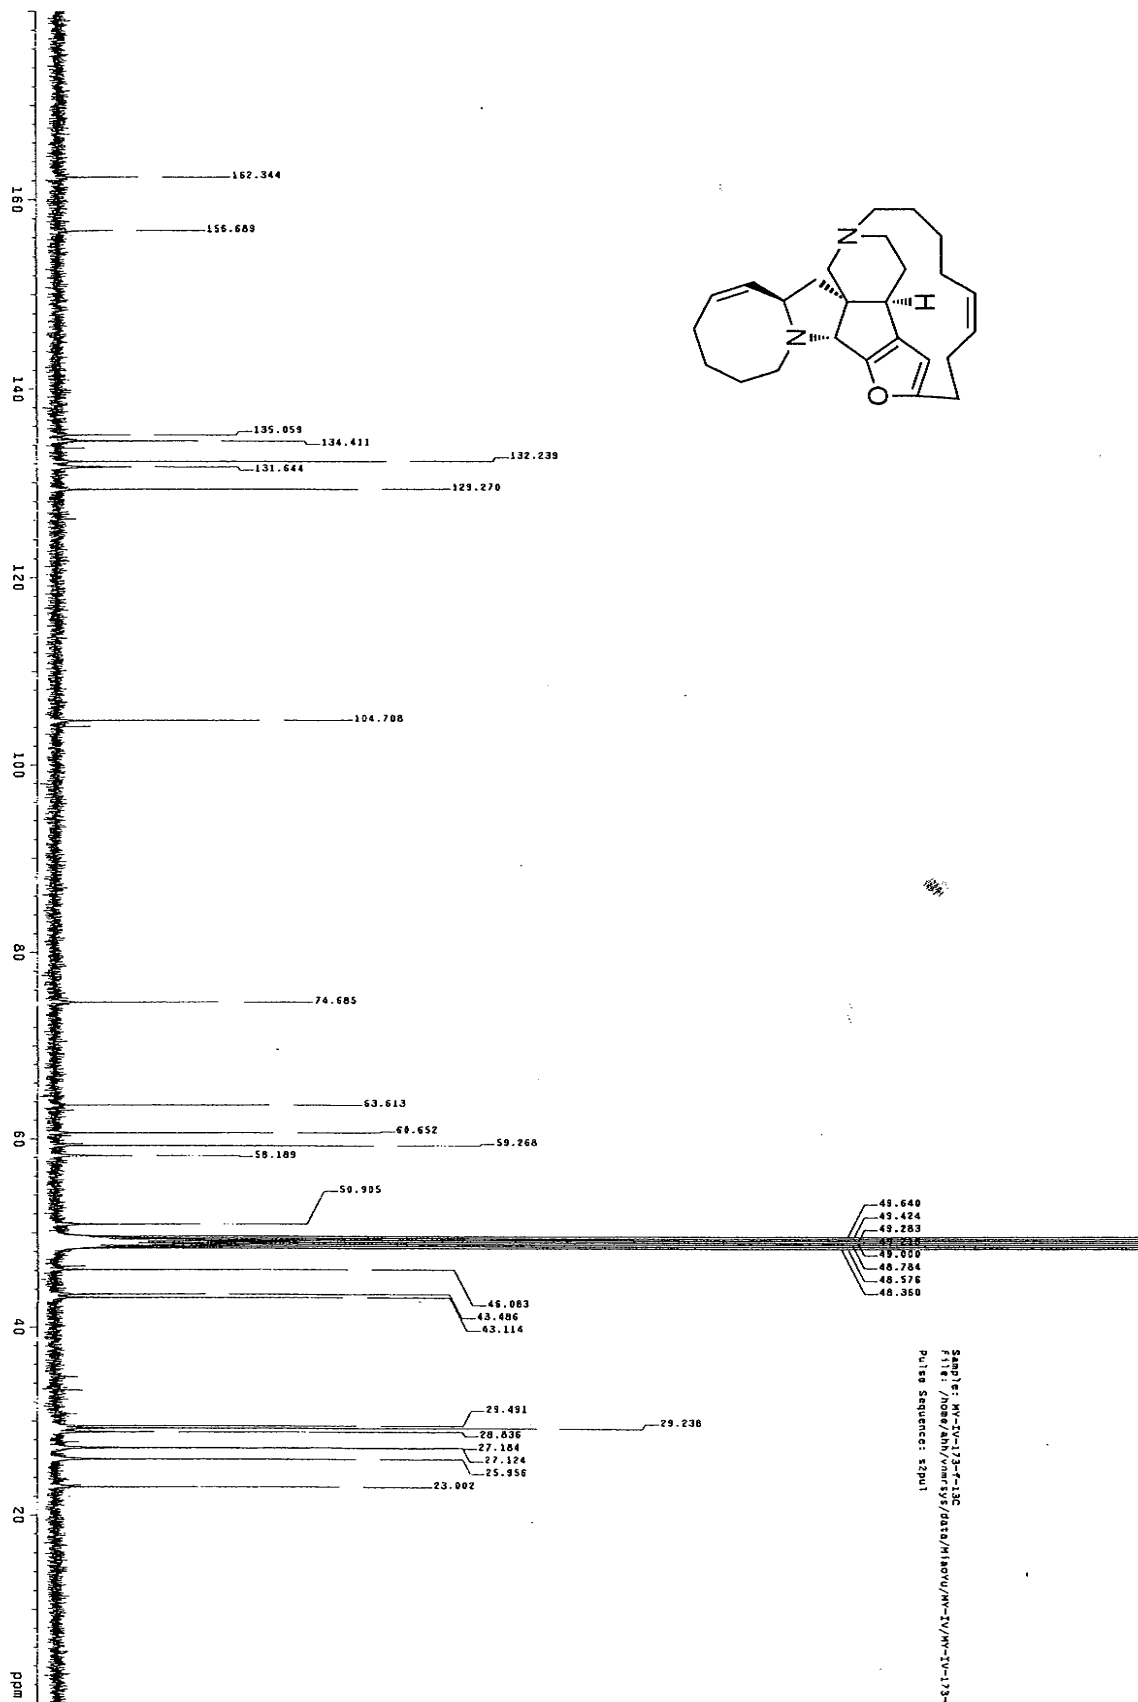

Supplement: NIHMS324798-supplement-1.pdf [file NIHMS324798-supplement-1.pdf]
